# Supplementary material for: Rhodium(iii)-catalyzed switchable C–H acylmethylation and annulation of 2,2′-bipyridine derivatives with sulfoxonium ylides
Source: Royal Society of Chemistry journal article supplement (doi:10.1039/d1ob00590a), 2021-01-01
Supplement: d1ob00590a1.pdf [file d1ob00590a1.pdf]

# Supporting Information

## Rhodium(III)-Catalyzed Switchable C–H Acylmethylation and Annulation of 2,2'-Bipyridine Derivatives with Sulfoxonium Ylides

Mengjia Chen, Haifang Meng, Fang Yang, Yani Wang, Chen Chen\* and Bolin Zhu\*

*Tianjin Key Laboratory of Structure and Performance for Functional Molecules, College of Chemistry, Tianjin Normal University, Tianjin 300387, P. R. China. E-mail: hxycc@tjnu.edu.cn, hxyzb1@tjnu.edu.cn.*

### Table of Contents

|                                                      |     |
|------------------------------------------------------|-----|
| General Information-----                             | S02 |
| Preparation of Starting Materials-----               | S02 |
| Characterization of Products-----                    | S06 |
| Control Experiment-----                              | S21 |
| Synthetic Transformations-----                       | S21 |
| References-----                                      | S24 |
| NMR Spectra-----                                     | S25 |
| Crystallography-----                                 | S84 |
| X-Ray Crystallographic Data of 3ab, 3ea and 4aa----- | S86 |

## General information:

The  $^1\text{H}$  NMR,  $^{19}\text{F}$  NMR, and  $^{13}\text{C}$  NMR were recorded with Bruker 400 MHz spectrometer instruments in  $\text{CDCl}_3$ . The chemical shifts ( $\delta$ ) of  $^1\text{H}$  NMR and  $^{13}\text{C}$  NMR were measured in ppm, referenced to residual  $^1\text{H}$  and  $^{13}\text{C}$  signals of nondeuterated  $\text{CDCl}_3$  ( $\delta = 7.26$  and  $77.00$ ) as internal standards. All solvents were obtained from commercial sources and were purified according to standard procedures. Purification of products was accomplished by flash chromatography using silica gel (200~300 mesh). Thin layer chromatography (TLC) was performed on Merck silica gel GF254 plates. Melting points were obtained on a Yanaco-241 apparatus and have been corrected with standards. HRMS were recorded on VG ZAB-HS mass spectrometer with ESI resource.

## Preparation of Starting Materials:

### Synthesis of **1a**<sup>[1]</sup>

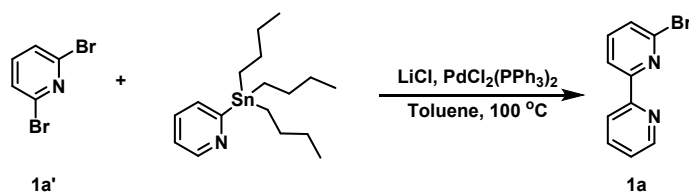

A toluene solution (35.0 mL) containing **1a'** (1.26 g, 5.3 mmol), 2-(tri-n-butylstannyl)pyridine (1.95 g, 5.3 mmol),  $\text{LiCl}$  (2.5 g, 53.0 mmol), and  $[\text{PdCl}_2(\text{PPh}_3)_2]$  (294.8 mg, 0.42 mmol) was deaerated by bubbling  $\text{N}_2$  through it. The mixture was then refluxed under  $\text{N}_2$  for 18 h, and an aqueous solution (10.0 mL) of  $\text{NaF}$  (2.2 g, 53.0 mmol) was added to the solution at room temperature. The resultant solution was further stirred at ambient temperature for 30 min. An insoluble solid was filtered off, and the filtrate was treated with a 5%  $\text{Na}_2\text{CO}_3$  aqueous solution in a separating funnel. The organic layer was dried with anhydrous sodium sulfate, and the solvents were evaporated to dryness under reduced pressure. The obtained yellow solid was dissolved in PE/EA (95:5, v/v), and purified on a silica gel column.

### Synthesis of **1b**<sup>[1]</sup>

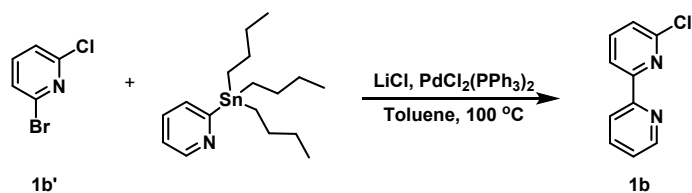

A toluene solution (35.0 mL) containing **1b'** (1.02 g, 5.3 mmol), 2-(tri-n-butylstannyl)pyridine (2.95 g, 8.0 mmol), LiCl (2.5 g, 53.0 mmol), and [PdCl<sub>2</sub>(PPh<sub>3</sub>)<sub>2</sub>] (294.8 mg, 0.42 mmol) was deaerated by bubbling N<sub>2</sub> through it. The mixture was then refluxed under N<sub>2</sub> for 18 h, and an aqueous solution (10.0 mL) of NaF (2.2 g, 53.0 mmol) was added to the solution at room temperature. The resultant solution was further stirred at ambient temperature for 30 min. An insoluble solid was filtered off, and the filtrate was treated with a 5% Na<sub>2</sub>CO<sub>3</sub> aqueous solution in a separating funnel. The organic layer was dried with anhydrous sodium sulfate, and the solvents were evaporated to dryness under reduced pressure. The obtained yellow solid was dissolved in PE/EA (95:5, v/v), and purified on a silica gel column.

#### Synthesis of **1c**<sup>[1]</sup>

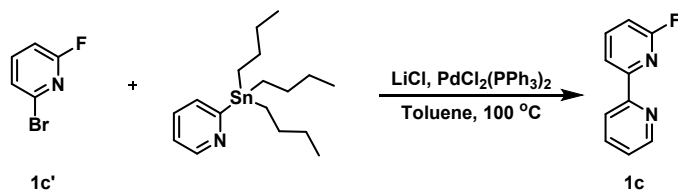

A toluene solution (35.0 mL) containing **1c'** (932.7 mg, 5.3 mmol), 2-(tri-n-butylstannyl)pyridine (2.95 g, 8.0 mmol), LiCl (2.5 g, 53.0 mmol), and [PdCl<sub>2</sub>(PPh<sub>3</sub>)<sub>2</sub>] (294.8 mg, 0.42 mmol) was deaerated by bubbling N<sub>2</sub> through it. The mixture was then refluxed under N<sub>2</sub> for 18 h, and an aqueous solution (10.0 mL) of NaF (2.2 g, 53.0 mmol) was added to the solution at room temperature. The resultant solution was further stirred at ambient temperature for 30 min. An insoluble solid was filtered off, and the filtrate was treated with a 5% Na<sub>2</sub>CO<sub>3</sub> aqueous solution in a separating funnel. The organic layer was dried with anhydrous sodium sulfate, and the solvents were evaporated to dryness under reduced pressure. The obtained white solid was dissolved in PE/EA (95:5, v/v), and purified on a silica gel column.

#### Synthesis of **1d**<sup>[1]</sup>

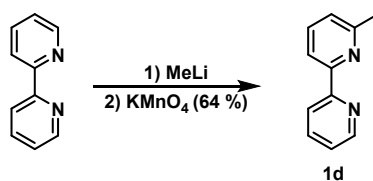

4.0 mL of 1.6 M methyl lithium in diethyl ether (67.5 mmol) was added dropwise to 40.0 mL of a diethyl ether solution containing 2,2'-bi-pyridine (1.0 g, 6.4 mmol) at 0°C. After complete addition (approximately 1 h), the resulting brown solution was gently refluxed for 3 h under N<sub>2</sub>. It was then allowed to cool to room temperature and water was added with stirring, resulting in a biphasic yellow solution. The aqueous layer was separated from the organic layer and extracted three times with diethyl ether. The combined organic layers were washed twice with brine followed by addition of anhydrous Na<sub>2</sub>SO<sub>4</sub> to remove residual water. The solution was then decanted into a round-bottom flask and the ether was removed by rotary evaporation. The resulting orange oil was oxidized with approximately 100.0 mL of a saturated KMnO<sub>4</sub>/acetone solution until formation of MnO<sub>2</sub> ceased. The MnO<sub>2</sub> was removed by vacuum filtration through celite. The filtrate was placed in a round-bottom flask and acetone was removed by rotary evaporation. The purification of the crude product by column chromatography (heptane/EtOAc: 1/1) give the desired product **1d**.

### Synthesis of **1e**<sup>[1]</sup>

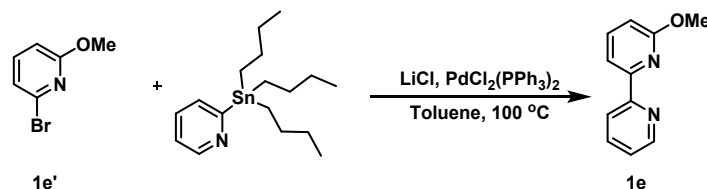

A toluene solution (35.0 mL) containing **1e'** (996.5 mg, 5.3 mmol), 2-(tri-*n*-butylstannyl)pyridine (2.9 g, 8.0 mmol), LiCl (2.5 g, 53.0 mmol), and [PdCl<sub>2</sub>(PPh<sub>3</sub>)<sub>2</sub>] (294.8 mg, 0.42 mmol) was deaerated by bubbling N<sub>2</sub> through it. The mixture was then refluxed under N<sub>2</sub> for 18 h, and an aqueous solution (10.0 mL) of NaF (2.2 g, 53.0 mmol) was added to the solution at room temperature. The resultant solution was further stirred at ambient temperature for 30 min. An insoluble solid was filtered off, and the filtrate was treated with a 5% Na<sub>2</sub>CO<sub>3</sub> aqueous solution in a separating funnel. The organic layer was dried with anhydrous sodium sulfate, and the solvents were evaporated to dryness under reduced pressure. The obtained oil was dissolved in PE/EA (95:5, v/v), and purified on a silica gel

column.

### Synthesis of 2

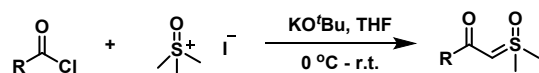

Ylides **2a-2q**<sup>[2]</sup> were prepared according to the reported procedures. To a stirred solution of potassium *tert*-butoxide (3.0 g, 27.2 mmol) in THF (30.0 mL) was added trimethylsulfoxonium iodide (5.0 g, 20.6 mmol) at room temperature. The resulting mixture is refluxed for 2 h. Then reaction mixture is cooled to 0 °C, followed by addition of acyl chlorides (7.0 mmol) in THF (5.0 mL). The reaction was allowed to room temperature and stirred for 3 h. Next, the solvent was evaporated and water (15.0 mL) and ethyl acetate (20.0 mL) were added to the resulting slurry. The layers were separated and the aqueous layer was washed with ethyl acetate (2 x 30 mL) and the organic layers were combined. The organic solution was dried over anhydrous sodium sulphate (Na<sub>2</sub>SO<sub>4</sub>), filtered over a sintered funnel, and evaporated to dryness. The crude product was purified by flash chromatography over silica gel using EtOAc/MeOH to afford the corresponding sulfoxonium ylides.

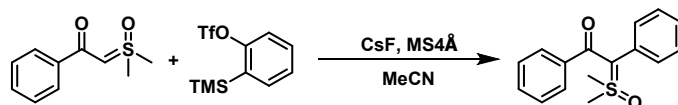

To a 3 mL glass vial containing a magnetic stirrer and fitted with a Teflon cap, the respective  $\beta$ -ketosulfoxonium ylide (1.0 equiv, 0.13 mmol), activated molecular sieves 4Å powder (25.0 mg), CsF (4.0 equiv, 77.4 mg, 0.51 mmol), and dry acetonitrile (1.0 mL) were added. Under vigorous stirring, the appropriate precursor of aryne (1.5 equiv, 0.19 mmol) was added in three portions (2.0 equiv in four portions for amino acid derivatives) at intervals of 1 hour (at 65 °C). After 3 hours, the organic solvent was removed into rotary evaporator and the crude product purified by flash chromatography, employing the basic silica gel and mixtures of 0.5 to 2 % of MeOH in CHCl<sub>3</sub> to give the product **2r**<sup>[3]</sup>.

### Synthesis of 3

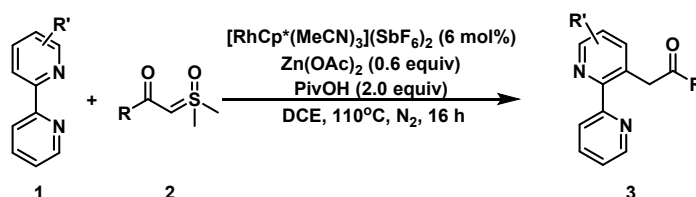

A sealed tube contained **1** (0.2 mmol), **2** (0.4 mmol), [Cp\**Rh*(MeCN)<sub>3</sub>](SbF<sub>6</sub>)<sub>2</sub> (10.0 mg, 0.012 mol), Zn(OAc)<sub>2</sub> (22.0 mg, 0.12 mmol) and PivOH (0.4 mmol, 2.0 equiv) was filled and

purged with nitrogen gas three times. Then DCE (4.0 mL) was added to the system via syringe under a nitrogen atmosphere and the reaction was allowed to stir at 110 °C for 16 h. The reaction solution was concentrated in vacuum and the residue was purified by column chromatography on silica gel to afford the desired pure product **3**.

### Synthesis of 4

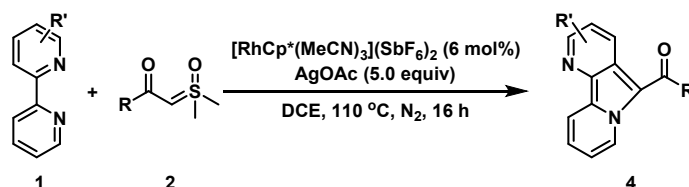

A sealed tube contained **1** (0.2 mmol), **2** (0.4 mmol),  $[\text{Cp}^*\text{Rh}(\text{MeCN})_3](\text{SbF}_6)_2$  (10.0 mg, 0.012 mol), and AgOAc (166.9 mg, 1.0 mmol) was filled and purged with nitrogen gas three times. Then DCE (4.0 mL) was added to the system via syringe under a nitrogen atmosphere and the reaction was allowed to stir at 110 °C for 16 h. The reaction solution was concentrated in vacuum and the residue was purified by column chromatography on silica gel to afford the desired pure product **4**.

### Characterization of Products:

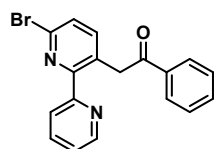

#### 2-(6-bromo-[2,2'-bipyridin]-3-yl)-1-phenylethanone (**3aa**)

White solid (58 mg, 83%); M.P.: 122-124 °C.  $^1\text{H NMR}$  (400 MHz,  $\text{CDCl}_3$ )  $\delta$  8.22 – 8.19 (m, 1H), 8.10 – 8.07 (m, 1H), 8.01 – 7.98 (m, 2H), 7.78 – 7.72 (m, 1H), 7.61 – 7.56 (m, 1H), 7.53 – 7.47 (m, 4H), 7.16 – 7.12 (m, 1H), 4.73 (s, 2H).  $^{13}\text{C NMR}$  (100 MHz,  $\text{CDCl}_3$ )  $\delta$  196.6, 156.2, 155.2, 147.5, 143.6, 139.6, 137.1, 136.9, 132.8, 129.2, 128.5, 128.1, 127.5, 123.9, 123.3, 43.3. **ESI-MS**: Calcd for  $\text{C}_{18}\text{H}_{13}\text{BrN}_2\text{O}$ :  $[\text{M}+\text{H}^+]$  353.0284, found 353.0288.

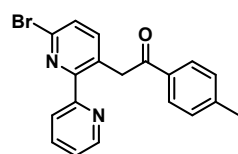

#### 2-(6-bromo-[2,2'-bipyridin]-3-yl)-1-(p-tolyl)ethanone (**3ab**)

White solid (60 mg, 82%); M.P.: 170-172 °C.  $^1\text{H NMR}$  (400 MHz,  $\text{CDCl}_3$ )  $\delta$  8.18 (d,  $J = 8.0$  Hz, 1H), 8.14 (d,  $J = 4.8$  Hz, 1H), 7.89 (d,  $J = 8.0$  Hz, 2H), 7.78 – 7.72 (m, 1H), 7.52 – 7.46 (m, 2H), 7.27 (d,  $J = 8.4$  Hz, 2H), 7.17 – 7.12 (m, 1H), 4.71 (s, 2H), 2.43 (s, 3H).  $^{13}\text{C NMR}$  (100 MHz,  $\text{CDCl}_3$ )  $\delta$  196.3, 156.3, 155.4, 147.6, 143.6, 143.5, 139.5, 136.8, 134.5, 129.4, 129.2, 128.3, 127.4, 124.0, 123.2, 43.1, 21.6. **ESI-MS:** Calcd for  $\text{C}_{19}\text{H}_{15}\text{BrN}_2\text{O}$ :  $[\text{M}+\text{H}^+]$  367.0441, found 367.0447.

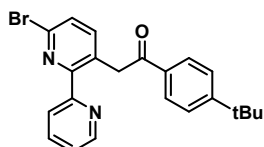

2-(6-bromo-[2,2'-bipyridin]-3-yl)-1-(4-(*tert*-butyl)phenyl)ethanone (**3ac**)

White solid (69 mg, 85%); M.P.: 125-127 °C.  $^1\text{H NMR}$  (400 MHz,  $\text{CDCl}_3$ )  $\delta$  8.20 (dd,  $J = 4.8, 0.8$  Hz, 1H), 8.17 (d,  $J = 8.0$  Hz, 1H), 7.92 (d,  $J = 8.4$  Hz, 2H), 7.79 – 7.73 (m, 1H), 7.50 – 7.46 (m, 4H), 7.19 – 7.14 (m, 1H), 4.74 (s, 2H), 1.36 (s, 9H).  $^{13}\text{C NMR}$  (100 MHz,  $\text{CDCl}_3$ )  $\delta$  197.8, 162.2, 157.6, 150.8, 147.3, 144.0, 137.6, 136.4, 132.4, 128.4, 128.1, 123.4, 122.6, 122.5, 110.5, 53.4, 53.3, 43.1. **ESI-MS:** Calcd for  $\text{C}_{22}\text{H}_{21}\text{BrN}_2\text{O}$ :  $[\text{M}+\text{H}^+]$  409.0910, found 409.0919.

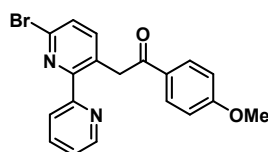

2-(6-bromo-[2,2'-bipyridin]-3-yl)-1-(4-methoxyphenyl)ethanone (**3ad**)

White solid (61 mg, 80%); M.P.: 133-136 °C.  $^1\text{H NMR}$  (400 MHz,  $\text{CDCl}_3$ )  $\delta$  8.19 (d,  $J = 4.8$  Hz, 1H), 8.16 (d,  $J = 8.0$  Hz, 1H), 7.97 (d,  $J = 8.8$  Hz, 2H), 7.78 – 7.72 (m, 1H), 7.52 – 7.46 (m, 2H), 7.15 (dd,  $J = 7.6, 4.8$  Hz, 1H), 6.95 (d,  $J = 8.8$  Hz, 2H), 4.69 (s, 2H), 3.88 (s, 3H).  $^{13}\text{C NMR}$  (100 MHz,  $\text{CDCl}_3$ )  $\delta$  195.3, 163.3, 156.4, 155.5, 147.6, 143.4, 136.8, 130.4, 130.0, 129.5, 127.4, 124.1, 123.2, 113.7, 55.4, 42.7. **ESI-MS:** Calcd for  $\text{C}_{19}\text{H}_{15}\text{BrN}_2\text{O}_2$ :  $[\text{M}+\text{H}^+]$  383.0390, found 383.0396.

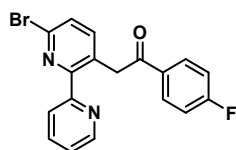

2-(6-bromo-[2,2'-bipyridin]-3-yl)-1-(4-fluorophenyl)ethanone (**3ae**)

Gray solid (67 mg, 90%); M.P.: 137-139 °C.  $^1\text{H NMR}$  (400 MHz,  $\text{CDCl}_3$ )  $\delta$  8.22 (d,  $J = 8.0$  Hz, 1H), 8.08 (d,  $J = 4.4$  Hz, 1H), 8.05 – 8.00 (m, 2H), 7.78 – 7.73 (m, 1H), 7.49 (s, 2H), 7.18 – 7.13 (m, 3H), 4.69 (s, 2H).  $^{13}\text{C NMR}$  (100 MHz,  $\text{CDCl}_3$ )  $\delta$  196.9, 162.9, 160.6, 156.2, 152.3, 147.5, 146.4 (d,  $J = 7.0$  Hz), 137.3, 136.8, 132.7, 128.5, 128.1, 123.7, 123.2, 109.0 (d,  $J = 39.0$  Hz), 43.0.  $^{19}\text{F NMR}$  (376 MHz,  $\text{CDCl}_3$ )  $\delta$  -105.67. **ESI-MS:** Calcd for  $\text{C}_{18}\text{H}_{12}\text{BrFN}_2\text{O}$ :  $[\text{M}+\text{H}^+]$  371.0190, found 371.0197.

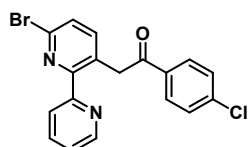

2-(6-bromo-[2,2'-bipyridin]-3-yl)-1-(4-chlorophenyl)ethanone (**3af**)

White solid (66 mg, 86%); M.P.: 147-148 °C.  $^1\text{H NMR}$  (400 MHz,  $\text{CDCl}_3$ )  $\delta$  8.24 (d,  $J = 8.0$  Hz, 1H), 8.05 (d,  $J = 4.0$  Hz, 1H), 7.96 – 7.93 (m, 2H), 7.78 – 7.73 (m, 1H), 7.50 – 7.44 (m, 4H), 7.17 – 7.13 (m, 1H), 4.67 (s, 2H).  $^{13}\text{C NMR}$  (100 MHz,  $\text{CDCl}_3$ )  $\delta$  195.4, 156.1, 155.0, 147.4, 143.6, 139.7, 139.1, 136.9, 135.5, 129.6, 128.9, 128.8, 127.5, 124.0, 123.4, 43.3. **ESI-MS:** Calcd for  $\text{C}_{18}\text{H}_{12}\text{BrClN}_2\text{O}$ :  $[\text{M}+\text{H}^+]$  386.9894, found 386.9898.

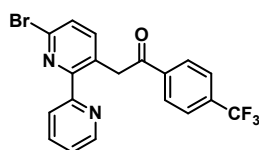

2-(6-bromo-[2,2'-bipyridin]-3-yl)-1-(4-(trifluoromethyl)phenyl)ethanone (**3ag**)

White solid (44 mg, 52%); M.P.: 161-163 °C.  $^1\text{H NMR}$  (400 MHz,  $\text{CDCl}_3$ )  $\delta$  8.30 – 8.26 (m, 1H), 8.11 (d,  $J = 8.0$  Hz, 2H), 7.98 – 7.95 (m, 1H), 7.79 – 7.73 (m, 3H), 7.51 (s, 2H), 7.16 – 7.12 (m, 1H), 4.70 (s, 2H).  $^{13}\text{C NMR}$  (100 MHz,  $\text{CDCl}_3$ )  $\delta$  195.5, 155.9, 154.8, 147.2, 143.7, 140.1, 139.8, 137.0, 134.1 (q,  $J = 33.0$  Hz), 128.7, 128.5, 127.6, 125.6, 124.0, 123.7 (q,  $J = 271.0$  Hz), 123.4, 43.7.  $^{19}\text{F NMR}$  (376 MHz,  $\text{CDCl}_3$ )  $\delta$  -62.97. **ESI-MS:** Calcd for  $\text{C}_{19}\text{H}_{12}\text{BrF}_3\text{N}_2\text{O}$ :  $[\text{M}+\text{H}^+]$  421.0158, found 421.0166.

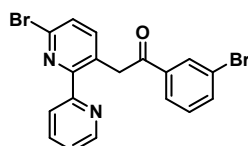

2-(6-bromo-[2,2'-bipyridin]-3-yl)-1-(3-bromophenyl)ethanone (**3ah**)

White solid (68 mg, 79%); M.P.: 152-154 °C.  $^1\text{H NMR}$  (400 MHz,  $\text{CDCl}_3$ )  $\delta$  8.24 (d,  $J = 8.0$  Hz, 1H), 8.13 (s, 1H), 8.05 (d,  $J = 4.8$  Hz, 1H), 7.92 (d,  $J = 7.6$  Hz, 1H), 7.78 – 7.69 (m, 2H),



7.49 (s, 2H), 7.40 – 7.35 (m, 1H), 7.17 – 7.13 (m, 1H), 4.66 (s, 2H). <sup>13</sup>C NMR (100 MHz, CDCl<sub>3</sub>) δ 195.1, 155.9, 154.8, 147.3, 143.6, 139.7, 139.0, 136.9, 135.6, 131.2, 130.1, 128.7, 127.5, 126.6, 123.9, 123.4, 122.8, 43.4. **ESI-MS:** Calcd for C<sub>18</sub>H<sub>12</sub>Br<sub>2</sub>N<sub>2</sub>O: [M+H<sup>+</sup>] 430.9389, found 430.9395.

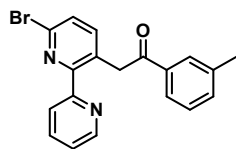

2-(6-bromo-[2,2'-bipyridin]-3-yl)-1-(m-tolyl)ethanone (**3ai**)

White solid (55 mg, 75%); M.P.: 112-114 °C. <sup>1</sup>H NMR (400 MHz, CDCl<sub>3</sub>) δ 8.19 (d, *J* = 8.0 Hz, 1H), 8.15 – 8.12 (m, 1H), 7.80 – 7.73 (m, 3H), 7.52 – 7.46 (m, 2H), 7.41 – 7.34 (m, 2H), 7.17 – 7.13 (m, 1H), 4.71 (s, 2H), 2.41 (s, 3H). <sup>13</sup>C NMR (100 MHz, CDCl<sub>3</sub>) δ 196.8, 156.3, 155.4, 147.5, 143.5, 139.5, 138.3, 137.1, 136.8, 133.6, 129.3, 128.7, 128.4, 127.4, 125.4, 124.0, 123.2, 43.3, 21.3. **ESI-MS:** Calcd for C<sub>19</sub>H<sub>15</sub>BrN<sub>2</sub>O: [M+H<sup>+</sup>] 367.0441, found 367.0450.

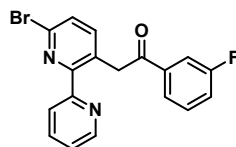

2-(6-bromo-[2,2'-bipyridin]-3-yl)-1-(3-fluorophenyl)ethanone (**3aj**)

White solid (52 mg, 70%); M.P.: 130-132 °C. <sup>1</sup>H NMR (400 MHz, CDCl<sub>3</sub>) δ 8.24 (d, *J* = 8.0 Hz, 1H), 8.04 (d, *J* = 4.4 Hz, 1H), 7.76 (dd, *J* = 18.8, 7.8 Hz, 2H), 7.67 (d, *J* = 9.2 Hz, 1H), 7.50 – 7.44 (m, 3H), 7.32 – 7.26 (m, 1H), 7.16 – 7.12 (m, 1H), 4.67 (s, 2H). <sup>13</sup>C NMR (100 MHz, CDCl<sub>3</sub>) δ 195.3, 164.1, 161.6, 156.1, 155.0, 147.4, 143.6, 139.7, 139.4 (d, *J* = 6.0 Hz), 136.9, 130.2 (d, *J* = 7.0 Hz), 128.8, 127.5, 123.8 (d, *J* = 3.0 Hz), 123.4, 119.7 (d, *J* = 22.0 Hz), 114.9 (d, *J* = 23.0 Hz), 43.5. <sup>19</sup>F NMR (376 MHz, CDCl<sub>3</sub>) δ -111.88. **ESI-MS:** Calcd for C<sub>18</sub>H<sub>12</sub>BrFN<sub>2</sub>O: [M+H<sup>+</sup>] 371.0190, found 371.0196.

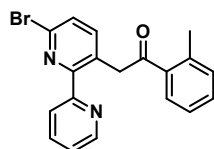

2-(6-bromo-[2,2'-bipyridin]-3-yl)-1-(o-tolyl)ethanone (**3ak**)

White solid (45 mg, 61%); M.P.: 120-121 °C. <sup>1</sup>H NMR (400 MHz, CDCl<sub>3</sub>) δ 8.15 (d, *J* = 8.0 Hz, 1H), 8.11 – 8.09 (m, 1H), 7.75 – 7.68 (m, 2H), 7.49 – 7.43 (m, 2H), 7.38 – 7.33 (m, 1H), 7.25 – 7.21 (m, 2H), 7.14 – 7.09 (m, 1H), 4.59 (s, 2H), 2.36 (s, 3H). <sup>13</sup>C NMR (100 MHz, CDCl<sub>3</sub>) δ 199.6, 156.4, 155.4, 147.4, 143.6, 139.5, 138.5, 137.9, 136.8, 131.9, 131.1, 129.4, 128.3, 127.4, 125.5, 124.1, 123.2, 46.1, 21.1. **ESI-MS:** Calcd for C<sub>19</sub>H<sub>15</sub>BrN<sub>2</sub>O: [M+H<sup>+</sup>] 367.0441, found 367.0443.

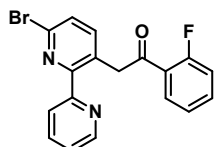

2-(6-bromo-[2,2'-bipyridin]-3-yl)-1-(2-fluorophenyl)ethan-1-one (**3al**)

Yellow oil (53 mg, 71%); <sup>1</sup>H NMR (400 MHz, CDCl<sub>3</sub>) δ 8.22 (d, *J* = 8.0 Hz, 1H), 8.02 – 7.99 (m, 1H), 7.85 – 7.80 (m, 1H), 7.76 – 7.71 (m, 1H), 7.55 – 7.47 (m, 3H), 7.28 – 7.23 (m, 1H), 7.19 – 7.10 (m, 2H), 4.63 (d, *J* = 2.4 Hz, 2H). <sup>13</sup>C NMR (100 MHz, CDCl<sub>3</sub>) δ 194.9, 162.7, 160.2, 156.0, 155.1, 147.2, 143.7, 139.5, 136.7, 134.0 (d, *J* = 9.0 Hz), 130.9 (d, *J* = 3.0 Hz), 129.0, 127.4, 126.2 (d, *J* = 13.0 Hz), 123.8, 123.2, 116.5 (d, *J* = 24.0 Hz), 48.06. <sup>19</sup>F NMR (376 MHz, CDCl<sub>3</sub>) δ -109.76. **ESI-MS:** Calcd for C<sub>18</sub>H<sub>12</sub>BrFN<sub>2</sub>O: [M+H<sup>+</sup>] 371.0190, found 371.0186.

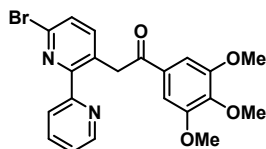

2-(6-bromo-[2,2'-bipyridin]-3-yl)-1-(3,4,5-trimethoxyphenyl)ethanone (**3am**)

White solid (52 mg, 59%); M.P.: 157-159 °C. <sup>1</sup>H NMR (400 MHz, CDCl<sub>3</sub>) δ 8.23 (d, *J* = 4.0 Hz, 1H), 8.18 (d, *J* = 8.0 Hz, 1H), 7.79 – 7.74 (m, 1H), 7.50 – 7.45 (m, 2H), 7.27 (s, 2H), 7.20 – 7.16 (m, 1H), 4.72 (s, 2H), 3.92 (s, 3H), 3.87 (s, 6H). <sup>13</sup>C NMR (100 MHz, CDCl<sub>3</sub>) δ 195.6, 156.4, 155.1, 153.0, 147.5, 143.2, 142.4, 139.5, 136.9, 132.2, 129.2, 127.5, 124.1, 123.3, 105.8, 60.8, 56.3, 42.9. **ESI-MS:** Calcd for C<sub>21</sub>H<sub>19</sub>BrN<sub>2</sub>O<sub>4</sub>: [M+H<sup>+</sup>] 443.0601, found 443.0604.

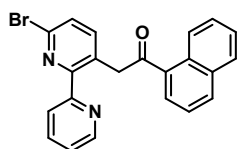

2-(6-bromo-[2,2'-bipyridin]-3-yl)-1-(naphthalen-1-yl)ethanone (**3an**)

Colorless oil (64 mg, 80%); <sup>1</sup>H NMR (400 MHz, CDCl<sub>3</sub>) δ 8.48 – 8.45 (m, 1H), 8.21 (d, *J* = 8.0 Hz, 1H), 8.02 – 7.97 (m, 2H), 7.90 – 7.88 (m, 2H), 7.75 – 7.69 (m, 1H), 7.58 – 7.49 (m, 5H), 7.07 – 7.03 (m, 1H), 4.77 (s, 2H). <sup>13</sup>C NMR (100 MHz, CDCl<sub>3</sub>) δ 199.6, 156.3, 155.5, 147.6, 143.7, 139.6, 136.8, 136.1, 133.9, 132.4, 130.2, 129.2, 128.2, 127.6, 127.5, 127.0, 126.4, 126.1, 124.2, 124.0, 123.2, 46.7. **ESI-MS:** Calcd for C<sub>22</sub>H<sub>15</sub>BrN<sub>2</sub>O: [M+H<sup>+</sup>] 403.0441, found 403.0448.

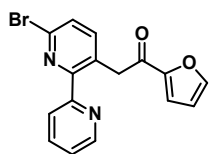

2-(6-bromo-[2,2'-bipyridin]-3-yl)-1-(furan-2-yl)ethanone (**3ao**)

Gray solid (51 mg, 74%); M.P.: 112-114 °C. <sup>1</sup>H NMR (400 MHz, CDCl<sub>3</sub>) δ 8.19 (d, *J* = 4.4 Hz, 1H), 8.15 (d, *J* = 8.0 Hz, 1H), 7.78 – 7.73 (m, 1H), 7.59 – 7.57 (m, 1H), 7.50 (dd, *J* = 20.0, 8.0 Hz, 2H), 7.21 – 7.16 (m, 2H), 6.55 (dd, *J* = 3.6, 1.6 Hz, 1H), 4.56 (s, 2H). <sup>13</sup>C NMR (100 MHz, CDCl<sub>3</sub>) δ 185.6, 156.2, 155.5, 152.6, 147.5, 146.0, 143.5, 139.6, 136.8, 128.3, 127.4, 124.0, 123.3, 116.7, 112.2, 42.8. **ESI-MS:** Calcd for C<sub>16</sub>H<sub>11</sub>BrN<sub>2</sub>O<sub>2</sub>: [M+H<sup>+</sup>] 343.0077, found 343.0078.

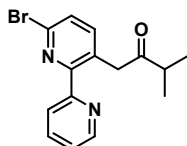

1-(6-bromo-[2,2'-bipyridin]-3-yl)-3-methylbutan-2-one (**3ap**)

White solid (32 mg, 50%); M.P.: 120-122 °C. <sup>1</sup>H NMR (400 MHz, CDCl<sub>3</sub>) δ 8.53 (d, *J* = 4.8 Hz, 1H), 8.14 (d, *J* = 8.0 Hz, 1H), 7.83 – 7.78 (m, 1H), 7.44 (dd, *J* = 20.8, 8.0 Hz, 2H), 7.30 – 7.27 (m, 1H), 4.21 (s, 2H), 2.84 – 2.77 (m, 1H), 1.11 (d, *J* = 7.2 Hz, 6H). <sup>13</sup>C NMR (100 MHz, CDCl<sub>3</sub>) δ 210.3, 156.7, 155.7, 147.5, 143.3, 139.4, 136.9, 129.0, 127.4, 124.3, 123.3, 45.0, 40.6, 18.2. **ESI-MS:** Calcd for C<sub>15</sub>H<sub>15</sub>BrN<sub>2</sub>O: [M+H<sup>+</sup>] 319.0441, found 319.0448.

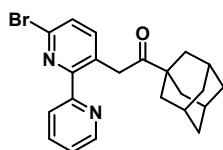

1-((1s,3s)-adamantan-1-yl)-2-(6-bromo-[2,2'-bipyridin]-3-yl)ethan-1-one (**3aq**)

White solid (63 mg, 77%); M.P.: 129-131 °C. **<sup>1</sup>H NMR** (400 MHz, CDCl<sub>3</sub>) δ 8.56 – 8.53 (m, 1H), 8.04 (d, *J* = 8.0 Hz, 1H), 7.81 – 7.75 (m, 1H), 7.43 (d, *J* = 8.0 Hz, 1H), 7.33 (d, *J* = 8.0 Hz, 1H), 7.28 – 7.23 (m, 1H), 4.31 (s, 2H), 2.03 (s, 3H), 1.81 (d, *J* = 2.8 Hz, 6H), 1.71 (dd, *J* = 27.6, 12.0 Hz, 6H). **<sup>13</sup>C NMR** (100 MHz, CDCl<sub>3</sub>) δ 211.5, 157.1, 156.2, 147.7, 143.2, 139.2, 136.8, 129.4, 127.2, 124.5, 123.1, 46.5, 40.8, 38.5, 36.5, 28.0. **ESI-MS**: Calcd for C<sub>22</sub>H<sub>23</sub>BrN<sub>2</sub>O: [M+H<sup>+</sup>] 410.0994, found 410.1001.

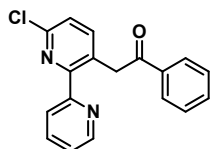

2-(6-chloro-[2,2'-bipyridin]-3-yl)-1-phenylethan-1-one (**3ba**)

White solid (54 mg, 88%); M.P.: 101-102 °C. **<sup>1</sup>H NMR** (400 MHz, CDCl<sub>3</sub>) δ 8.20 (d, *J* = 8.0 Hz, 1H), 8.09 (dd, *J* = 4.8, 0.8 Hz, 1H), 8.01 – 7.98 (m, 2H), 7.78 – 7.72 (m, 1H), 7.63 – 7.56 (m, 2H), 7.51 – 7.46 (m, 2H), 7.35 (d, *J* = 8.0 Hz, 1H), 7.16 – 7.12 (m, 1H), 4.74 (s, 2H). **<sup>13</sup>C NMR** (100 MHz, CDCl<sub>3</sub>) δ 196.7, 156.3, 154.7, 149.1, 147.5, 143.9, 137.2, 136.9, 132.8, 128.8, 128.5, 128.1, 123.9, 123.7, 123.2, 43.2. **ESI-MS**: Calcd for C<sub>18</sub>H<sub>13</sub>ClN<sub>2</sub>O: [M+H<sup>+</sup>] 309.0789, found 309.0798.

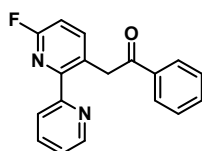

2-(6-fluoro-[2,2'-bipyridin]-3-yl)-1-phenylethan-1-one (**3ca**)

White solid (50 mg, 85%); M.P.: 129-131 °C. **<sup>1</sup>H NMR** (400 MHz, CDCl<sub>3</sub>) δ 8.19 (d, *J* = 8.0 Hz, 1H), 8.08 (d, *J* = 4.4 Hz, 1H), 8.03 – 8.00 (m, 2H), 7.78 – 7.72 (m, 2H), 7.62 – 7.57 (m, 1H), 7.49 (t, *J* = 7.6 Hz, 2H), 7.16 – 7.11 (m, 1H), 6.97 (dd, *J* = 8.0, 3.6 Hz, 1H), 4.76 (s, 2H). **<sup>13</sup>C NMR** (100 MHz, CDCl<sub>3</sub>) δ 195.1, 166.8, 164.3, 156.2, 155.1, 147.4, 143.6, 139.7, 136.9, 133.6 (d, *J* = 3.0 Hz), 130.7 (d, *J* = 9.0 Hz), 129.0, 127.5, 124.0, 115.6 (d, *J* = 21.0 Hz), 43.2. **<sup>19</sup>F NMR** (376 MHz, CDCl<sub>3</sub>) δ -70.17. **ESI-MS**: Calcd for C<sub>18</sub>H<sub>13</sub>FN<sub>2</sub>O: [M+H<sup>+</sup>] 293.1085, found 293.1094.

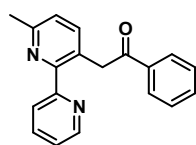

2-(6-methyl-[2,2'-bipyridin]-3-yl)-1-phenylethan-1-one (**3da**)

Colorless oil (48 mg, 83%);  $^1\text{H NMR}$  (400 MHz,  $\text{CDCl}_3$ )  $\delta$  8.19 – 8.16 (m, 1H), 8.10 (d,  $J = 8.0$  Hz, 1H), 7.98 – 7.95 (m, 2H), 7.77 – 7.71 (m, 1H), 7.58 – 7.53 (m, 2H), 7.48 – 7.43 (m, 2H), 7.18 (d,  $J = 8.0$  Hz, 1H), 7.15 – 7.10 (m, 1H), 4.67 (s, 2H), 2.63 (s, 3H).  $^{13}\text{C NMR}$  (100 MHz,  $\text{CDCl}_3$ )  $\delta$  197.4, 158.2, 156.5, 154.3, 147.6, 141.0, 137.3, 136.7, 132.7, 128.5, 128.2, 126.5, 123.9, 122.9, 122.6, 43.2, 24.3. **ESI-MS**: Calcd for  $\text{C}_{19}\text{H}_{16}\text{N}_2\text{O}$ :  $[\text{M}+\text{H}^+]$  289.1335, found 289.1335.

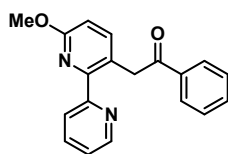

2-(6-methoxy-[2,2'-bipyridin]-3-yl)-1-phenylethan-1-one (**3ea**)

White solid (50 mg, 82%); M.P.: 128-130 °C.  $^1\text{H NMR}$  (400 MHz,  $\text{CDCl}_3$ )  $\delta$  8.26 (d,  $J = 8.0$  Hz, 1H), 8.09 (d,  $J = 4.4$  Hz, 1H), 8.03 – 8.00 (m, 2H), 7.76 – 7.70 (m, 1H), 7.59 – 7.52 (m, 2H), 7.50 – 7.45 (m, 2H), 7.12 – 7.08 (m, 1H), 6.80 (d,  $J = 8.4$  Hz, 1H), 4.71 (s, 2H), 4.02 (s, 3H).  $^{13}\text{C NMR}$  (100 MHz,  $\text{CDCl}_3$ )  $\delta$  197.8, 162.2, 157.6, 150.8, 147.3, 144.0, 137.6, 136.4, 132.4, 128.4, 128.1, 123.4, 122.6, 122.5, 110.5, 53.3, 43.1. **ESI-MS**: Calcd for  $\text{C}_{19}\text{H}_{16}\text{N}_2\text{O}_2$ :  $[\text{M}+\text{H}^+]$  305.1285, found 305.1283.

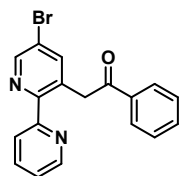

2-(5-bromo-[2,2'-bipyridin]-3-yl)-1-phenylethan-1-one (**3fa**)

White solid (18 mg, 25%); M.P.: 102-103 °C.  $^1\text{H NMR}$  (400 MHz,  $\text{CDCl}_3$ )  $\delta$  8.69 (d,  $J = 2.4$  Hz, 1H), 8.16 (d,  $J = 8.0$  Hz, 1H), 8.08 – 8.06 (m, 1H), 8.01 – 7.98 (m, 2H), 7.82 (d,  $J = 2.0$  Hz, 1H), 7.78 – 7.72 (m, 1H), 7.62 – 7.57 (m, 1H), 7.52 – 7.47 (m, 2H), 7.16 – 7.11 (m, 1H), 4.72 (s, 2H).  $^{13}\text{C NMR}$  (100 MHz,  $\text{CDCl}_3$ )  $\delta$  196.4, 157.0, 153.2, 148.7, 147.5, 143.2, 137.2, 136.8, 132.8, 131.8, 128.6, 128.2, 123.6, 123.0, 120.2, 43.7. **ESI-MS**: Calcd for  $\text{C}_{18}\text{H}_{13}\text{BrN}_2\text{O}$ :  $[\text{M}+\text{H}^+]$  353.0284, found 353.0290.

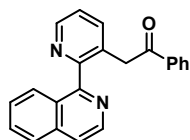

2-(2-(isoquinolin-1-yl)pyridin-3-yl)-1-phenylethan-1-one (**3ga**)

Colorless oil (34 mg, 52%); <sup>1</sup>H NMR (400 MHz, CDCl<sub>3</sub>) δ 8.63 (dd, *J* = 4.8, 1.6 Hz, 1H), 8.36 (d, *J* = 6.0 Hz, 1H), 7.86 (d, *J* = 8.4 Hz, 1H), 7.76 (d, *J* = 8.0 Hz, 2H), 7.64 – 7.55 (m, 4H), 7.49 – 7.45 (m, 1H), 7.43 – 7.35 (m, 2H), 7.25 – 7.20 (m, 2H), 4.32 (s, 2H). <sup>13</sup>C NMR (100 MHz, CDCl<sub>3</sub>) δ 196.7, 158.1, 156.6, 147.5, 141.3, 139.7, 136.9, 136.4, 133.0, 130.6, 130.3, 128.4, 128.1, 127.6, 127.4, 127.3, 126.7, 123.3, 120.9, 41.9. **ESI-MS**: Calcd for C<sub>22</sub>H<sub>16</sub>N<sub>2</sub>O: [M+H<sup>+</sup>] 325.1335, found 325.1339.

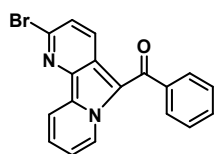

(2-bromopyrido[2,3-*a*]indolizin-5-yl)(phenyl)methanone (**4aa**)

Yellow solid (52 mg, 73%); M.P.: 129-130 °C. <sup>1</sup>H NMR (400 MHz, CDCl<sub>3</sub>) δ 10.50 (d, *J* = 6.8 Hz, 1H), 8.53 (d, *J* = 8.0 Hz, 1H), 7.65 (d, *J* = 7.2 Hz, 2H), 7.63 – 7.57 (m, 2H), 7.55 – 7.50 (m, 2H), 7.47 (t, *J* = 6.8 Hz, 1H), 7.27 – 7.24 (m, 1H), 6.97 (d, *J* = 8.8 Hz, 1H). <sup>13</sup>C NMR (100 MHz, CDCl<sub>3</sub>) δ 183.5, 141.5, 136.5, 135.7, 132.9, 130.8, 129.4, 128.8, 128.7, 128.1, 126.9, 126.0, 124.2, 120.1, 118.1, 111.4. **ESI-MS**: Calcd for C<sub>18</sub>H<sub>11</sub>BrN<sub>2</sub>O: [M+H<sup>+</sup>] 351.0128, found 351.0128.

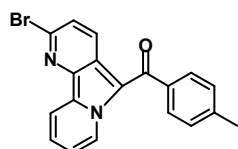

(2-bromopyrido[2,3-*a*]indolizin-5-yl)(*p*-tolyl)methanone (**4ab**)

Yellow solid (51 mg, 70%); M.P.: 166-169 °C. <sup>1</sup>H NMR (400 MHz, CDCl<sub>3</sub>) δ 10.48 (d, *J* = 7.2 Hz, 1H), 8.56 – 8.53 (m, 1H), 7.62 – 7.56 (m, 3H), 7.48 – 7.44 (m, 1H), 7.33 – 7.27 (m, 3H), 7.12 (d, *J* = 8.8 Hz, 1H), 2.48 (s, 3H). <sup>13</sup>C NMR (100 MHz, CDCl<sub>3</sub>) δ 183.7, 141.3, 138.7, 136.4, 135.7, 132.8, 129.7, 129.3, 128.7, 128.4, 126.8, 125.7, 124.2, 119.9, 118.1, 111.6, 21.6. **ESI-MS**: Calcd for C<sub>19</sub>H<sub>13</sub>BrN<sub>2</sub>O: [M+H<sup>+</sup>] 365.0284, found 365.0285.

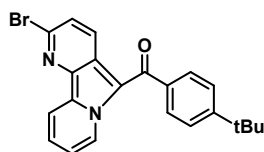

(2-bromopyrido[2,3-*a*]indolizin-5-yl)(4-(*tert*-butyl)phenyl)methanone (**4ac**)

Yellow solid (61 mg, 75%); M.P.: 178-179 °C. <sup>1</sup>H NMR (400 MHz, CDCl<sub>3</sub>) δ 10.48 (d, *J* = 6.8 Hz, 1H), 8.55 (d, *J* = 8.8 Hz, 1H), 7.63 – 7.57 (m, 3H), 7.53 (d, *J* = 8.0 Hz, 2H), 7.45 (t, *J* = 6.8 Hz, 1H), 7.30 (d, *J* = 8.8 Hz, 1H), 7.12 (d, *J* = 8.8 Hz, 1H), 1.40 (s, 9H). <sup>13</sup>C NMR (100 MHz, CDCl<sub>3</sub>) δ 183.7, 154.5, 138.6, 136.4, 135.6, 132.7, 129.6, 128.7, 128.2, 126.8, 125.7, 125.5, 124.1, 119.9, 118.1, 111.6, 35.0, 31.24. **ESI-MS:** Calcd for C<sub>22</sub>H<sub>19</sub>BrN<sub>2</sub>O: [M+H<sup>+</sup>] 407.0754, found 407.0759.

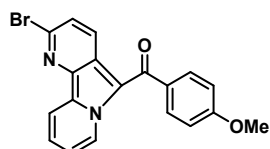

(2-bromopyrido[2,3-*a*]indolizin-5-yl)(4-methoxyphenyl)methanone (**4ad**)

Yellow solid (55 mg, 73%); M.P.: 218-219 °C. <sup>1</sup>H NMR (400 MHz, CDCl<sub>3</sub>) δ 10.42 (d, *J* = 7.2 Hz, 1H), 8.56 (d, *J* = 8.4 Hz, 1H), 7.70 (d, *J* = 8.8 Hz, 2H), 7.60 (t, *J* = 7.6 Hz, 1H), 7.48 – 7.44 (m, 1H), 7.34 – 7.26 (m, 2H), 7.05 (d, *J* = 8.8 Hz, 2H), 3.95 (s, 3H). <sup>13</sup>C NMR (100 MHz, CDCl<sub>3</sub>) δ 183.1, 162.0, 136.3, 135.5, 133.8, 132.5, 130.6, 129.6, 128.6, 126.7, 125.4, 123.9, 119.8, 118.1, 113.9, 111.6, 55.5. **ESI-MS:** Calcd for C<sub>19</sub>H<sub>13</sub>BrN<sub>2</sub>O<sub>2</sub>: [M+H<sup>+</sup>] 381.0233, found 381.0236.

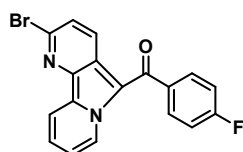

(2-bromopyrido[2,3-*a*]indolizin-5-yl)(4-fluorophenyl)methanone (**4ae**)

Yellow solid (56 mg, 77%); M.P.: 184-187 °C. <sup>1</sup>H NMR (400 MHz, CDCl<sub>3</sub>) δ 10.52 (d, *J* = 7.2 Hz, 1H), 8.60 (d, *J* = 8.4 Hz, 1H), 7.81 – 7.77 (m, 2H), 7.73 – 7.67 (m, 1H), 7.57 – 7.53 (m, 1H), 7.38 (d, *J* = 8.8 Hz, 1H), 7.34 – 7.29 (m, 2H), 7.16 (d, *J* = 8.8 Hz, 1H). <sup>13</sup>C NMR (100 MHz, CDCl<sub>3</sub>) δ 182.1, 165.5, 163.0, 137.6, 136.5, 135.7, 133.0, 130.6 (d, *J* = 8.0 Hz), 129.0 (d, *J* = 36.0 Hz), 127.0, 126.1, 124.0, 120.1, 118.1, 115.8 (d, *J* = 22.0 Hz), 111.2. <sup>19</sup>F NMR (376 MHz, CDCl<sub>3</sub>) δ -108.42. **ESI-MS:** Calcd for C<sub>18</sub>H<sub>10</sub>BrFN<sub>2</sub>O: [M+H<sup>+</sup>] 369.0033, found 369.0036.

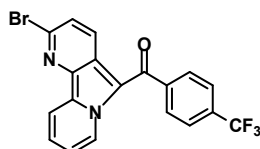

(2-bromopyrido[2,3-*a*]indolizin-5-yl)(4-(trifluoromethyl)phenyl)methanone (**4ag**)

Yellow solid (33 mg, 40%); M.P.: 190-192 °C. <sup>1</sup>H NMR (400 MHz, CDCl<sub>3</sub>) δ 10.55 – 10.51 (m, 1H), 8.57 – 8.54 (m, 1H), 7.82 – 7.76 (m, 4H), 7.70 – 7.64 (m, 1H), 7.53 – 7.49 (m, 1H), 7.30 (d, *J* = 8.8 Hz, 1H), 6.92 (d, *J* = 9.2 Hz, 1H). <sup>13</sup>C NMR (100 MHz, CDCl<sub>3</sub>) δ 181.5, 144.8, 136.8, 136.2, 133.6, 132.5 (q, *J* = 33.0 Hz), 129.1, 128.9, 128.5, 127.4, 126.9, 125.8, 123.8 (q, *J* = 271.0 Hz), 124.2, 120.5, 118.2, 111.1. <sup>19</sup>F NMR (376 MHz, CDCl<sub>3</sub>) δ -62.65. **ESI-MS:** Calcd for C<sub>19</sub>H<sub>10</sub>BrF<sub>3</sub>N<sub>2</sub>O: [M+H<sup>+</sup>] 419.0001, found 419.0001.

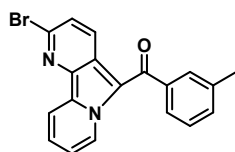

(2-bromopyrido[2,3-*a*]indolizin-5-yl)(4-methoxyphenyl)methanone (**4ai**)

Yellow solid (51 mg, 70%); M.P.: 175-176 °C. <sup>1</sup>H NMR (400 MHz, CDCl<sub>3</sub>) δ 10.52 (d, *J* = 7.2 Hz, 1H), 8.58 – 8.54 (m, 1H), 7.65 – 7.60 (m, 1H), 7.51 – 7.40 (m, 5H), 7.31 – 7.27 (m, 1H), 7.03 (d, *J* = 8.8 Hz, 1H), 2.46 (s, 3H). <sup>13</sup>C NMR (100 MHz, CDCl<sub>3</sub>) δ 183.8, 141.6, 138.6, 136.5, 135.7, 132.9, 131.5, 129.6, 128.9, 128.6, 128.5, 126.9, 125.9, 125.2, 124.3, 120.1, 118.1, 111.5, 21.4. **ESI-MS:** Calcd for C<sub>19</sub>H<sub>13</sub>BrN<sub>2</sub>O: [M+H<sup>+</sup>] 365.0284, found 365.0292.

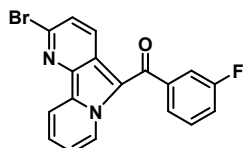

(2-bromopyrido[2,3-*a*]indolizin-5-yl)(3-fluorophenyl)methanone (**4aj**)

Yellow solid (48 mg, 66%); M.P.: 208-210 °C. <sup>1</sup>H NMR (400 MHz, CDCl<sub>3</sub>) δ 10.51 (d, *J* = 7.2 Hz, 1H), 8.55 (d, *J* = 8.4 Hz, 1H), 7.67 – 7.62 (m, 1H), 7.54 – 7.47 (m, 2H), 7.44 – 7.41 (m, 1H), 7.39 – 7.35 (m, 1H), 7.32 – 7.26 (m, 2H), 7.00 (d, *J* = 8.8 Hz, 1H). <sup>13</sup>C NMR (100 MHz, CDCl<sub>3</sub>) δ 181.6 (d, *J* = 2.0 Hz), 164.0, 161.5, 143.7, 143.6, 136.7, 136.0, 130.5 (d, *J* = 8.0 Hz), 129.1 (d, *J* = 5.0 Hz), 127.2, 126.5, 124.3, 123.8 (d, *J* = 3.0 Hz), 120.3, 118.2, 117.7 (d, *J* = 21.0 Hz), 115.2 (d, *J* = 22.0 Hz), 111.1. <sup>19</sup>F NMR (376 MHz, CDCl<sub>3</sub>) δ -111.38. **ESI-MS:** Calcd for C<sub>18</sub>H<sub>10</sub>BrFN<sub>2</sub>O: [M+H<sup>+</sup>] 369.0033, found 369.0038.



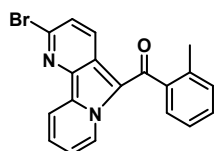

(2-bromopyrido[2,3-*a*]indolizin-5-yl)(*o*-tolyl)methanone (**4ak**)

Yellow solid (56 mg, 76%); M.P.: 220-222 °C. **<sup>1</sup>H NMR** (400 MHz, CDCl<sub>3</sub>) δ 10.72 (d, *J* = 6.8 Hz, 1H), 8.57 (d, *J* = 8.4 Hz, 1H), 7.69 – 7.64 (m, 1H), 7.54 – 7.51 (m, 1H), 7.46 – 7.42 (m, 1H), 7.37 – 7.31 (m, 3H), 7.23 (d, *J* = 8.8 Hz, 1H), 6.45 (d, *J* = 8.8 Hz, 1H), 2.27 (s, 3H). **<sup>13</sup>C NMR** (100 MHz, CDCl<sub>3</sub>) δ 184.0, 141.4, 136.6, 136.1, 134.8, 133.3, 130.9, 129.5, 129.2, 128.9, 127.5, 126.8, 126.5, 126.2, 124.5, 120.3, 118.1, 111.7, 19.0. **ESI-MS**: Calcd for C<sub>19</sub>H<sub>13</sub>BrN<sub>2</sub>O: [M+H<sup>+</sup>] 364.0211, found 364.0218.

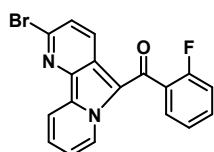

(2-bromopyrido[2,3-*a*]indolizin-5-yl)(2-fluorophenyl)methanone (**4al**)

Yellow solid (67 mg, 91%); M.P.: 215-216 °C. **<sup>1</sup>H NMR** (400 MHz, CDCl<sub>3</sub>) δ 10.70 (d, *J* = 6.8 Hz, 1H), 8.60 (d, *J* = 8.4 Hz, 1H), 7.74 – 7.69 (m, 1H), 7.61 – 7.53 (m, 3H), 7.39 – 7.28 (m, 3H), 6.85 (d, *J* = 8.8 Hz, 1H). **<sup>13</sup>C NMR** (100 MHz, CDCl<sub>3</sub>) δ 177.6, 160.3, 157.9, 136.8, 136.4, 133.6, 131.8 (d, *J* = 8.0 Hz), 130.0 (d, *J* = 17.0 Hz), 129.4 (d, *J* = 3.0 Hz), 128.6, 127.6, 127.0, 124.6 (d, *J* = 39.0 Hz), 120.5, 118.2, 116.6, 116.4 (d, *J* = 21.0 Hz), 112.0. **<sup>19</sup>F NMR** (376 MHz, CDCl<sub>3</sub>) δ -115.96. **ESI-MS**: Calcd for C<sub>18</sub>H<sub>10</sub>BrFN<sub>2</sub>O: [M+H<sup>+</sup>] 367.9961, found 367.9966.

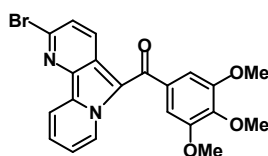

(2-bromopyrido[2,3-*a*]indolizin-5-yl)(3,4,5-trimethoxyphenyl)methanone (**4am**)

Yellow solid (53 mg, 60%); M.P.: 221-222 °C. **<sup>1</sup>H NMR** (400 MHz, CDCl<sub>3</sub>) δ 10.47 – 10.44 (m, 1H), 8.57 (d, *J* = 8.0 Hz, 1H), 7.65 – 7.60 (m, 1H), 7.51 – 7.46 (m, 1H), 7.34 (d, *J* = 8.8 Hz, 1H), 7.22 (d, *J* = 8.8 Hz, 1H), 6.93 (s, 2H), 3.96 (s, 3H), 3.84 (s, 6H). **<sup>13</sup>C NMR** (100 MHz, CDCl<sub>3</sub>) δ 182.8, 153.4, 140.3, 136.7, 136.6, 135.8, 133.1, 129.7, 128.8, 126.9, 126.0, 124.2, 120.1, 118.2, 111.2, 105.5, 61.0, 56.2. **ESI-MS**: Calcd for C<sub>21</sub>H<sub>17</sub>BrN<sub>2</sub>O<sub>4</sub>: [M+H<sup>+</sup>] 441.0444, found 441.0447.

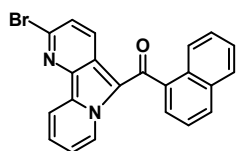

(2-bromopyrido[2,3-*a*]indolizin-5-yl)(naphthalen-1-yl)methanone (**4an**)

Yellow solid (69 mg, 86%); M.P.: 222-224 °C. <sup>1</sup>H NMR (400 MHz, CDCl<sub>3</sub>) δ 10.81 (d, *J* = 7.2 Hz, 1H), 8.57 – 8.52 (m, 1H), 8.04 – 8.00 (m, 1H), 7.95 – 7.92 (m, 2H), 7.67 – 7.62 (m, 1H), 7.60 – 7.47 (m, 4H), 7.42 – 7.37 (m, 1H), 7.03 (dd, *J* = 8.8, 4.4 Hz, 1H), 6.25 (dd, *J* = 8.8, 0.8 Hz, 1H). <sup>13</sup>C NMR (100 MHz, CDCl<sub>3</sub>) δ 183.0, 139.1, 136.5, 136.1, 133.6, 133.3, 130.2, 129.8, 129.3, 129.0, 128.2, 127.2, 126.9, 126.6, 126.4, 125.2, 125.1, 125.0, 124.3, 120.4, 118.0, 112.2. **ESI-MS**: Calcd for C<sub>22</sub>H<sub>13</sub>BrN<sub>2</sub>O: [M+H<sup>+</sup>] 401.0284, found 401.0293.

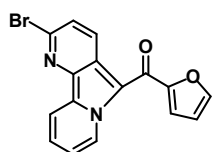

(2-bromopyrido[2,3-*a*]indolizin-5-yl)(furan-2-yl)methanone (**4ao**)

Yellow solid (56 mg, 82%); M.P.: 197-199 °C. <sup>1</sup>H NMR (400 MHz, CDCl<sub>3</sub>) δ 10.31 (d, *J* = 7.2 Hz, 1H), 8.55 (d, *J* = 8.4 Hz, 1H), 7.80 (d, *J* = 8.8 Hz, 1H), 7.68 (dd, *J* = 1.6, 0.8 Hz, 1H), 7.61 – 7.56 (m, 1H), 7.49 – 7.41 (m, 2H), 7.20 – 7.18 (m, 1H), 6.68 – 6.66 (m, 1H). <sup>13</sup>C NMR (100 MHz, CDCl<sub>3</sub>) δ 170.3, 153.2, 144.8, 136.6, 135.8, 133.0, 129.7, 128.6, 127.0, 125.8, 123.4, 119.9, 118.2, 116.3, 112.2, 111.6. **ESI-MS**: Calcd for C<sub>16</sub>H<sub>9</sub>BrN<sub>2</sub>O<sub>2</sub>: [M+H<sup>+</sup>] 340.9920, found 340.9927.

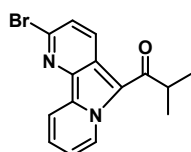

1-(2-bromopyrido[2,3-*a*]indolizin-5-yl)-2-methylpropan-1-one (**4ap**)

Yellow solid (41 mg, 64%); M.P.: 127-130 °C. <sup>1</sup>H NMR (400 MHz, CDCl<sub>3</sub>) δ 10.67 (d, *J* = 7.2 Hz, 1H), 8.54 (d, *J* = 8.4 Hz, 1H), 8.17 (d, *J* = 8.8 Hz, 1H), 7.61 (d, *J* = 8.8 Hz, 1H), 7.58 – 7.53 (m, 1H), 7.44 – 7.39 (m, 1H), 3.59 – 3.51 (m, 1H), 1.36 (d, *J* = 6.8 Hz, 6H). <sup>13</sup>C NMR (100 MHz, CDCl<sub>3</sub>) δ 192.2, 135.9, 135.8, 132.5, 129.2, 129.0, 127.4, 125.4, 122.1, 120.1, 118.0, 110.9, 37.5, 19.2. **ESI-MS**: Calcd for C<sub>15</sub>H<sub>13</sub>BrN<sub>2</sub>O: [M+H<sup>+</sup>] 317.0284, found 317.0284.

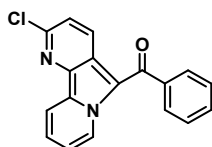

(2-chloropyrido[2,3-*a*]indolizin-5-yl)(phenyl)methanone (**4ba**)

Yellow solid (49 mg, 80%); M.P.: 156-158 °C. **<sup>1</sup>H NMR** (400 MHz, CDCl<sub>3</sub>) δ 10.50 (d, *J* = 6.8 Hz, 1H), 8.51 (d, *J* = 8.4 Hz, 1H), 7.66 – 7.56 (m, 4H), 7.54 – 7.50 (m, 2H), 7.48 – 7.43 (m, 1H), 7.10 (dd, *J* = 24.8, 8.8 Hz, 2H). **<sup>13</sup>C NMR** (100 MHz, CDCl<sub>3</sub>) δ 183.4, 146.0, 141.5, 134.9, 132.9, 130.7, 129.8, 128.8, 128.7, 128.1, 125.9, 124.0, 123.6, 120.0, 118.0, 111.4. **ESI-MS**: Calcd for C<sub>18</sub>H<sub>11</sub>ClN<sub>2</sub>O: [M+H<sup>+</sup>] 307.0633, found 307.0642.

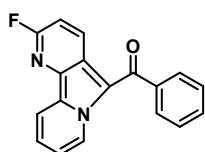

(2-fluoropyrido[2,3-*a*]indolizin-5-yl)(phenyl)methanone (**4ca**)

Yellow solid (41 mg, 70%); M.P.: 139-142 °C. **<sup>1</sup>H NMR** (400 MHz, CDCl<sub>3</sub>) δ 10.58 (d, *J* = 7.2 Hz, 1H), 8.50 (d, *J* = 8.4 Hz, 1H), 7.73 – 7.70 (m, 2H), 7.66 – 7.57 (m, 4H), 7.53 – 7.48 (m, 1H), 7.32 – 7.27 (m, 1H), 6.92 (dd, *J* = 9.2, 1.6 Hz, 1H). **<sup>13</sup>C NMR** (100 MHz, CDCl<sub>3</sub>) δ 182.1, 165.5, 163.0, 137.6, 136.5, 135.7, 133.0, 130.6 (d, *J* = 8.0 Hz), 129.0 (d, *J* = 36.0 Hz), 127.0, 126.1, 124.0, 120.1, 118.1, 115.8 (d, *J* = 22.0 Hz), 111.2. **<sup>19</sup>F NMR** (376 MHz, CDCl<sub>3</sub>) δ -70.16. **ESI-MS**: Calcd for C<sub>18</sub>H<sub>11</sub>FN<sub>2</sub>O: [M+H<sup>+</sup>] 291.0928, found 291.0932.

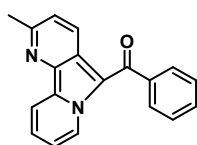

(2-methylpyrido[2,3-*a*]indolizin-5-yl)(phenyl)methanone (**4da**)

Yellow solid (44 mg, 77%); M.P.: 173-175 °C. **<sup>1</sup>H NMR** (400 MHz, CDCl<sub>3</sub>) δ 10.58 (d, *J* = 7.2 Hz, 1H), 8.59 – 8.55 (m, 1H), 7.68 – 7.65 (m, 2H), 7.60 – 7.55 (m, 2H), 7.54 – 7.49 (m, 2H), 7.46 – 7.41 (m, 1H), 7.08 – 7.01 (m, 2H), 2.69 (s, 3H). **<sup>13</sup>C NMR** (100 MHz, CDCl<sub>3</sub>) δ 183.1, 154.3, 142.1, 135.8, 134.0, 130.4, 129.0, 128.6, 128.1, 127.4, 125.5, 124.2, 123.7, 119.5, 117.8, 111.5, 24.6. **ESI-MS**: Calcd for C<sub>19</sub>H<sub>14</sub>N<sub>2</sub>O: [M+H<sup>+</sup>] 287.1179, found 287.1186.

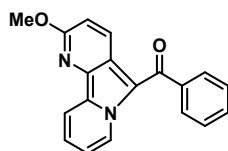

(2-methoxypyrido[2,3-*a*]indolizin-5-yl)(phenyl)methanone (**4ea**)

Yellow solid (42 mg, 70%); **M.P.:** 189-190 °C. **<sup>1</sup>H NMR** (400 MHz, CDCl<sub>3</sub>) δ 10.47 (d, *J* = 7.2 Hz, 1H), 8.37 (d, *J* = 8.8 Hz, 1H), 7.68 – 7.64 (m, 2H), 7.59 – 7.45 (m, 4H), 7.35 – 7.30 (m, 1H), 7.02 (d, *J* = 9.2 Hz, 1H), 6.70 (d, *J* = 9.2 Hz, 1H), 4.05 (s, 3H). **<sup>13</sup>C NMR** (100 MHz, CDCl<sub>3</sub>) δ 182.9, 160.8, 142.1, 133.0, 132.9, 130.5, 130.4, 128.7, 128.5, 128.2, 124.5, 122.2, 118.5, 117.7, 114.2, 111.9, 53.3. **ESI-MS:** Calcd for C<sub>19</sub>H<sub>14</sub>N<sub>2</sub>O<sub>2</sub>: [M+H<sup>+</sup>] 303.1128, found 303.1135.

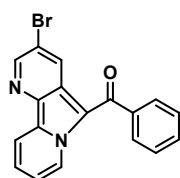

(3-bromopyrido[2,3-*a*]indolizin-5-yl)(phenyl)methanone (**4fa**)

Yellow solid (16 mg, 22%); **M.P.:** 206-208 °C. **<sup>1</sup>H NMR** (400 MHz, CDCl<sub>3</sub>) δ 10.58 (d, *J* = 7.2 Hz, 1H), 8.57 – 8.55 (m, 2H), 7.69 – 7.62 (m, 4H), 7.58 – 7.50 (m, 3H), 7.25 (d, *J* = 2.0 Hz, 1H). **<sup>13</sup>C NMR** (100 MHz, CDCl<sub>3</sub>) δ 183.6, 146.2, 141.4, 134.1, 131.0, 129.2, 128.8, 128.7, 128.0, 126.7, 126.5, 120.2, 120.0, 117.9, 110.8. **ESI-MS:** Calcd for C<sub>18</sub>H<sub>11</sub>BrN<sub>2</sub>O: [M+H<sup>+</sup>] 351.0128, found 351.0128.

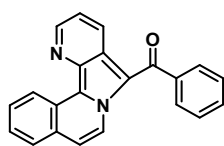

phenyl(pyrido[2',3':3,4]pyrrolo[2,1-*a*]isoquinolin-8-yl)methanone (**4ga**)

Yellow solid (15 mg, 24%); **M.P.:** 176-178 °C. **<sup>1</sup>H NMR** (400 MHz, CDCl<sub>3</sub>) δ 10.22 (d, *J* = 7.6 Hz, 1H), 9.99 – 9.96 (m, 1H), 8.73 (dd, *J* = 4.0, 1.6 Hz, 1H), 7.91 (d, *J* = 7.6 Hz, 1H), 7.86 – 7.81 (m, 1H), 7.76 – 7.69 (m, 3H), 7.64 – 7.59 (m, 2H), 7.57 – 7.52 (m, 2H), 7.25 – 7.21 (m, 1H), 7.18 – 7.14 (m, 1H). **<sup>13</sup>C NMR** (100 MHz, CDCl<sub>3</sub>) δ 184.3, 146.4, 142.0, 137.7, 130.9, 129.2, 128.6, 128.6, 127.8, 126.7, 126.2, 125.8, 125.7, 125.5, 121.6, 118.6, 112.8. **ESI-MS:** Calcd for C<sub>22</sub>H<sub>14</sub>N<sub>2</sub>O: [M+H<sup>+</sup>] 323.1179, found 323.1185.

## Control Experiment

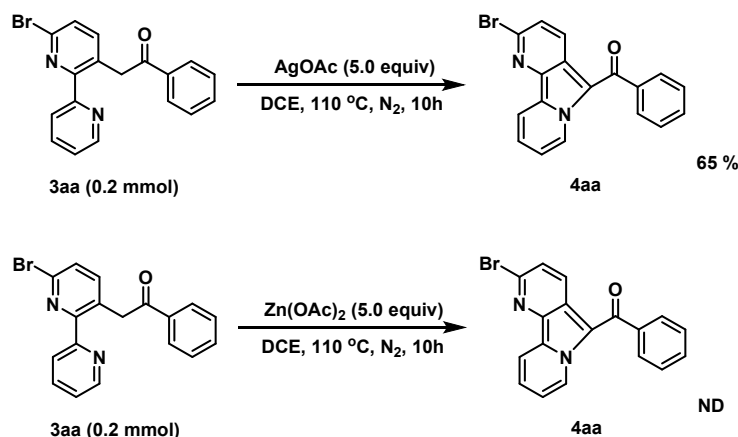

A sealed tube contained **3aa** (70.6 mg, 0.2 mmol), AgOAc (166.91 mg, 1.0 mmol) was filled and purged with nitrogen gas three times. Then DCE (4.0 mL) was added to the system via syringe under a nitrogen atmosphere and the reaction was allowed to stir at 110 °C for 10 h. The reaction solution was concentrated in vacuum and the residue was purified by column chromatography on silica gel to afford the desired pure product **4aa** (46 mg, 65%) as a yellow solid, next replace the added AgOAc with Zn(OAc)<sub>2</sub> (183.48 mg, 1.0 mmol), and the product **4aa** was not detected.

## Synthetic Transformations:

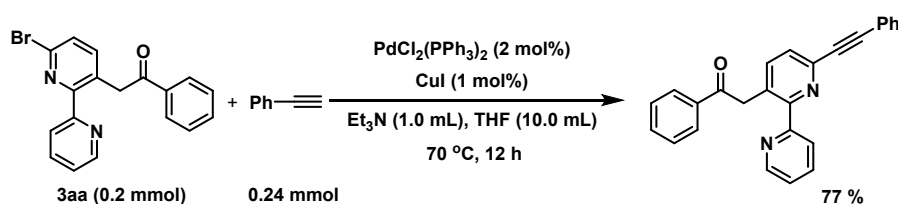

A mixture of **3aa** (70.6 mg, 0.2 mmol), phenylacetylene (24.5 mg, 0.24 mmol), PdCl<sub>2</sub>(PPh<sub>3</sub>)<sub>2</sub> (2.8 mg, 2 mmol%), Et<sub>3</sub>N (2.0 mL) and CuI (0.5 mg, 1 mmol%) in THF (10.0 mL) was heated at 70 °C overnight. The mixture was cooled to r.t., and the solvent was removed at reduced pressure. The residue was purified by silica gel chromatography to give **5** (58 mg, 77%) as a yellow solid.

M.P.: 121-122 °C. <sup>1</sup>H NMR (400 MHz, CDCl<sub>3</sub>) δ 8.21 (d, *J* = 8.0 Hz, 1H), 8.14 – 8.12 (m, 1H), 7.99 – 7.96 (m, 2H), 7.78 – 7.73 (m, 1H), 7.66 – 7.61 (m, 3H), 7.59 – 7.54 (m, 2H), 7.49 – 7.44 (m, 2H), 7.39 – 7.34 (m, 3H), 7.16 – 7.11 (m, 1H), 4.73 (s, 2H). <sup>13</sup>C NMR (100 MHz,

CDCl<sub>3</sub>)  $\delta$  196.8, 157.2, 155.2, 147.4, 141.4, 141.1, 137.1, 136.8, 132.7, 132.0, 129.4, 128.8, 128.5, 128.3, 128.1, 126.6, 124.1, 123.0, 122.3, 88.8, 88.7, 43.6. **ESI-MS**: Calcd for C<sub>26</sub>H<sub>18</sub>N<sub>2</sub>O: [M+H<sup>+</sup>] 375.1492, found 375.1491.

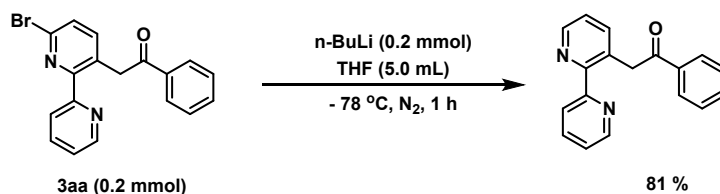

A 50.0 mL 3-neck flask was charged with **3aa** (70.6 mg, 0.2 mmol) in 5.0 mL THF under N<sub>2</sub>, and cooled to -78 °C with a acetone/liquid N<sub>2</sub> slush bath. A n-butyl lithium solution (0.3 mL, 0.4 mmol) was added dropwise to the slurry which changed color from white to orange. The temperature was then raised to -78 °C and within one hour it became an orange solution. Then in sequence, 5.0 mL methanol and then 2.0 mL H<sub>2</sub>O were added to the solution. The THF and methanol were removed by rotary evaporation and a yellow solid was isolated by vacuum filtration of the aqueous supernatant. The residue was purified by silica gel chromatography to give **6** (44 mg, 81%) as a white solid.

M.P.: 74-76 °C. **<sup>1</sup>H NMR** (400 MHz, CDCl<sub>3</sub>)  $\delta$  8.65 (dd,  $J$  = 4.8, 1.6 Hz, 1H), 8.15 – 8.11 (m, 2H), 8.01 – 7.97 (m, 2H), 7.78 – 7.72 (m, 1H), 7.78 – 7.65 (m, 1H), 7.59 – 7.54 (m, 1H), 7.50 – 7.45 (m, 2H), 7.32 (dd,  $J$  = 7.6, 4.8 Hz, 1H), 7.15 – 7.11 (m, 1H), 4.72 (s, 2H). **<sup>13</sup>C NMR** (100 MHz, CDCl<sub>3</sub>)  $\delta$  197.1, 157.9, 154.9, 147.8, 147.5, 140.9, 137.3, 136.7, 132.6, 129.9, 128.5, 128.2, 123.7, 123.1, 122.7, 43.8. **ESI-MS**: Calcd for C<sub>18</sub>H<sub>14</sub>N<sub>2</sub>O: [M+H<sup>+</sup>] 275.1179, found 275.1188.

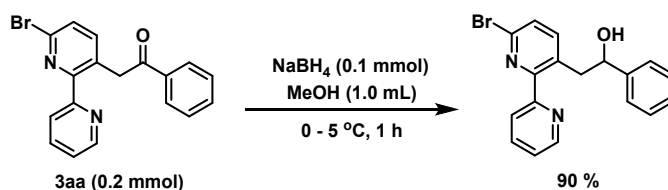

In a two-necked round bottomed flask **3aa** (70.6 mg, 0.2 mmol) was dissolved in methanol (1.0 mL) under a nitrogen atmosphere at ice-water temperature. Next, sodium borohydride (3.8 mg, 0.1 mmol) was added portionwise with stirring at a rate sufficient enough to maintain the reaction temperature at 0 – 5 °C. The reaction mixture was stirred for 1 h. Next, brine (1.0 mL) was added and the resultant suspension was stirred at room temperature for 10 min. The reaction mixture was diluted by the addition of AcOEt (5.0 mL) and distilled

water (3.0 mL), and the layers were separated. The aqueous layer was extracted with AcOEt. The combined organic layers were washed with brine and dried over MgSO<sub>4</sub>. Next, the solvent was evaporated to dryness leaving a crude product, the residue was purified by column chromatography to give **7** (64 mg, 90%) as a colorless oil.

**<sup>1</sup>H NMR** (400 MHz, CDCl<sub>3</sub>) δ 8.69 (d, *J* = 4.8 Hz, 1H), 8.05 (d, *J* = 8.0 Hz, 1H), 7.92 (t, *J* = 8.0 Hz, 1H), 7.45 – 7.41 (m, 4H), 7.37 (t, *J* = 7.6 Hz, 2H), 7.32 – 7.27 (m, 2H), 5.13 – 5.09 (m, 1H), 3.15 (d, *J* = 2.8 Hz, 1H), 3.14 (s, 1H). **<sup>13</sup>C NMR** (100 MHz, CDCl<sub>3</sub>) δ 156.3, 155.6, 146.7, 145.4, 142.2, 139.1, 138.2, 132.4, 128.3, 127.7, 127.1, 125.7, 125.6, 123.8, 74.6, 41.2. **ESI-MS**: Calcd for C<sub>18</sub>H<sub>15</sub>BrN<sub>2</sub>O: [M+H<sup>+</sup>] 355.0441, found 355.0442.

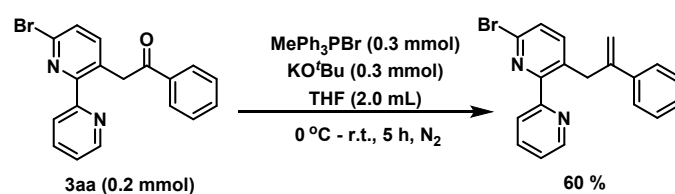

A mixture of MePPh<sub>3</sub>Br (107.2 mg, 0.3 mmol) and KO<sup>t</sup>Bu (33.7 mg, 0.3 mmol) in THF (2.0 mL) was stirred at room temperature for 1 h. Then **3aa** (70.6 mg, 0.2 mmol) was added dropwise to the reaction mixture at 0 °C. The reaction was stirred at room temperature until the starting material was disappeared. After that the solvents were evaporated under reduced pressure. The residue was purified by column chromatography to give **8** (42 mg, 60%) as a colorless oil.

**<sup>1</sup>H NMR** (400 MHz, CDCl<sub>3</sub>) δ 8.58 – 8.56 (m, 1H), 7.77 – 7.71 (m, 2H), 7.43 (d, *J* = 8.4 Hz, 1H), 7.30 (d, *J* = 8.0 Hz, 1H), 7.26 – 7.18 (m, 4H), 7.17 – 7.13 (m, 2H), 5.34 (s, 1H), 4.81 (d, *J* = 1.2 Hz, 1H), 4.14 (s, 2H). **<sup>13</sup>C NMR** (100 MHz, CDCl<sub>3</sub>) δ 157.3, 156.8, 148.4, 146.2, 141.3, 140.2, 138.9, 136.8, 133.4, 128.3, 127.6, 127.5, 126.1, 124.5, 123.2, 114.9, 37.4. **ESI-MS**: Calcd for C<sub>19</sub>H<sub>15</sub>BrN<sub>2</sub>: [M+H<sup>+</sup>] 351.0491, found 351.0493.

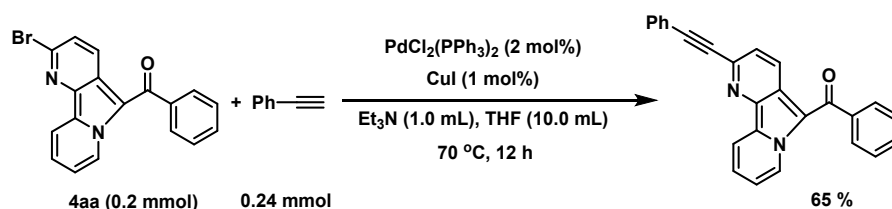

A mixture of **4aa** (70.2 mg, 0.2 mmol), phenylacetylene (24.5 mg, 0.24 mmol), PdCl<sub>2</sub>(PPh<sub>3</sub>)<sub>2</sub> (2.8 mg, 2 mmol%), Et<sub>3</sub>N (2.0 mL) and CuI (0.5 mg, 1 mmol%) in THF (10.0 mL) was heated at 70 °C overnight. The mixture was cooled to r.t., and the solvent was

removed at reduced pressure. The residue was purified by silica gel chromatography to give **9** (48 mg, 65%) as a yellow solid.

M.P.: 226-227 °C. <sup>1</sup>H NMR (400 MHz, CDCl<sub>3</sub>) δ 10.56 (d, *J* = 6.8 Hz, 1H), 8.69 (d, *J* = 8.4 Hz, 1H), 7.70 – 7.67 (m, 2H), 7.64 – 7.46 (m, 7H), 7.39 – 7.34 (m, 4H), 7.11 (d, *J* = 8.8 Hz, 1H). <sup>13</sup>C NMR (100 MHz, CDCl<sub>3</sub>) δ 183.6, 141.8, 138.2, 136.2, 134.0, 132.1, 130.8, 129.2, 128.9, 128.7, 128.4, 128.2, 126.9, 126.5, 126.4, 124.6, 122.4, 120.3, 118.4, 111.9, 89.6, 89.4. **ESI-MS**: Calcd for C<sub>26</sub>H<sub>16</sub>N<sub>2</sub>O: [M+H<sup>+</sup>] 373.1335, found 373.1341.

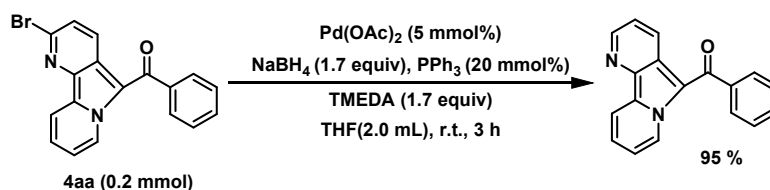

A mixture of the **3aa** (35.1 mg, 0.1 mmol) in anhydrous THF (2.0 mL) was degassed by bubbling argon for few minutes. Then, Pd(OAc)<sub>2</sub> (1.1 mg, 0.005 mmol), PPh<sub>3</sub> (5.3 mg, 0.02 mmol), TMEDA (19.9 mg, 0.17 mmol) and finally NaBH<sub>4</sub> (6.4 mg, 0.17 mmol) were introduced in sequence. The mixture was stirred at room temperature under argon for 1 h. The residue was taken up in brine and extracted with ethyl acetate. The organic phase was separated, dried (Na<sub>2</sub>SO<sub>4</sub>), the solvent was evaporated and the residue was purified by column chromatography to give **10** (25 mg, 90%) as a yellow solid.

M.P.: 137-139 °C. <sup>1</sup>H NMR (400 MHz, CDCl<sub>3</sub>) δ 10.60 (d, *J* = 7.2 Hz, 1H), 8.58 – 8.55 (m, 2H), 7.67 – 7.64 (m, 2H), 7.60 – 7.44 (m, 5H), 7.17 – 7.10 (m, 2H). <sup>13</sup>C NMR (100 MHz, CDCl<sub>3</sub>) δ 183.3, 145.4, 141.9, 136.1, 134.3, 130.4, 129.0, 128.6, 128.0, 127.0, 125.9, 125.8, 122.7, 119.9, 117.8, 111.4. **ESI-MS**: Calcd for C<sub>18</sub>H<sub>12</sub>N<sub>2</sub>O: [M+H<sup>+</sup>] 273.1022, found 273.1025.

## References:

- [1] S. Wu, Z. Wang, Y. Bao, C. Chen, K. Liu, and B. Zhu, *Chem. Commun.*, 2020, **56**, 4408–4411.
- [2] Y. Xu, X. Zhou, G. Zheng and X. Li, *Org. Lett.*, 2017, **19**, 5256–5259.
- [3] A. G. Talero, B. S. Martins and A. C. B. Burtoloso, *Org. Lett.*, 2018, **20**, 7206–7211.



## NMR Spectra

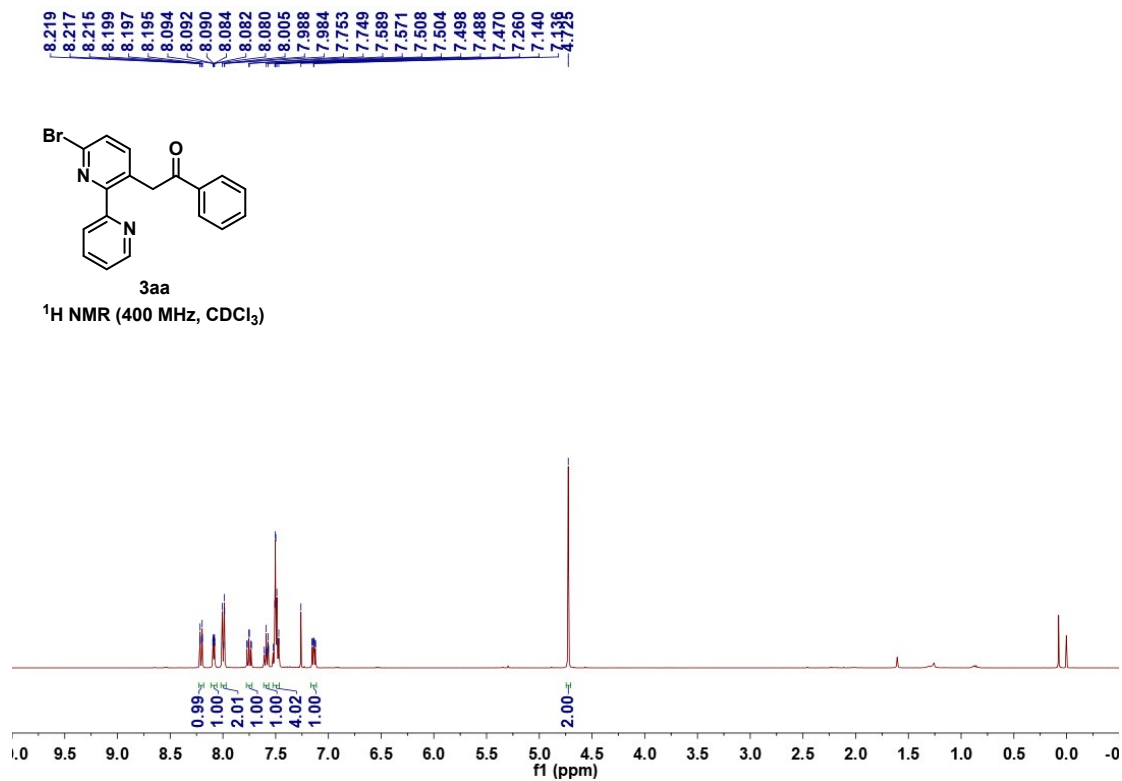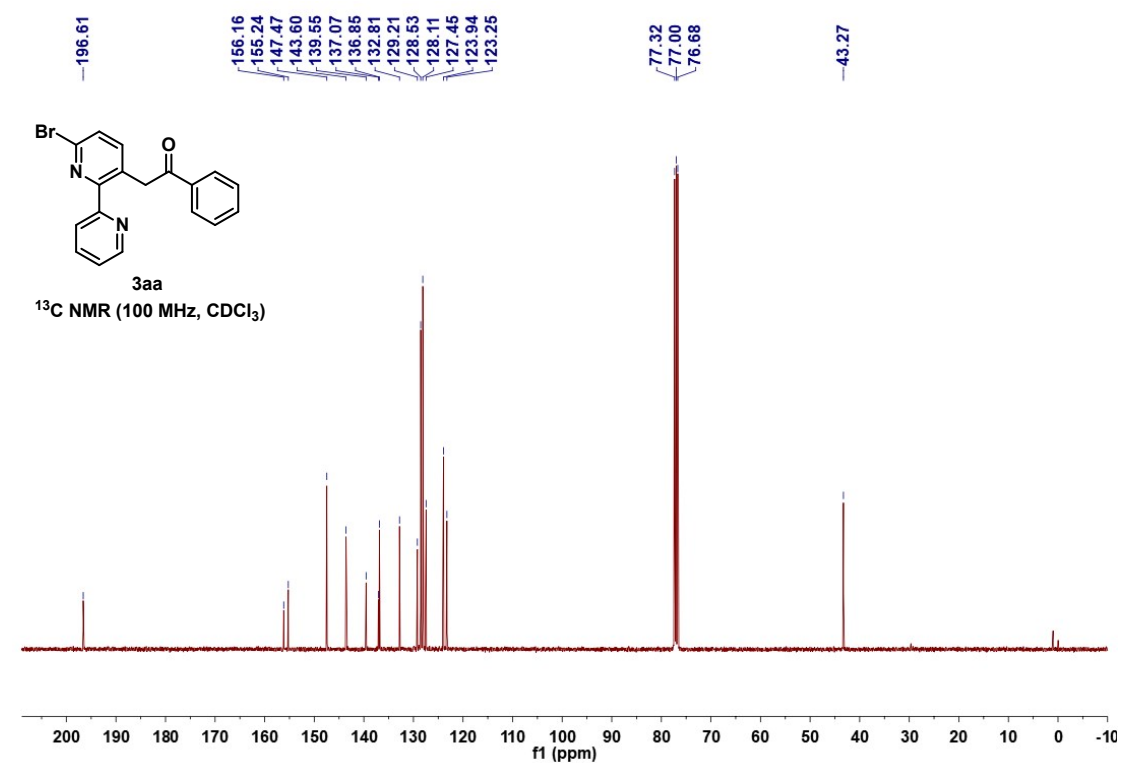

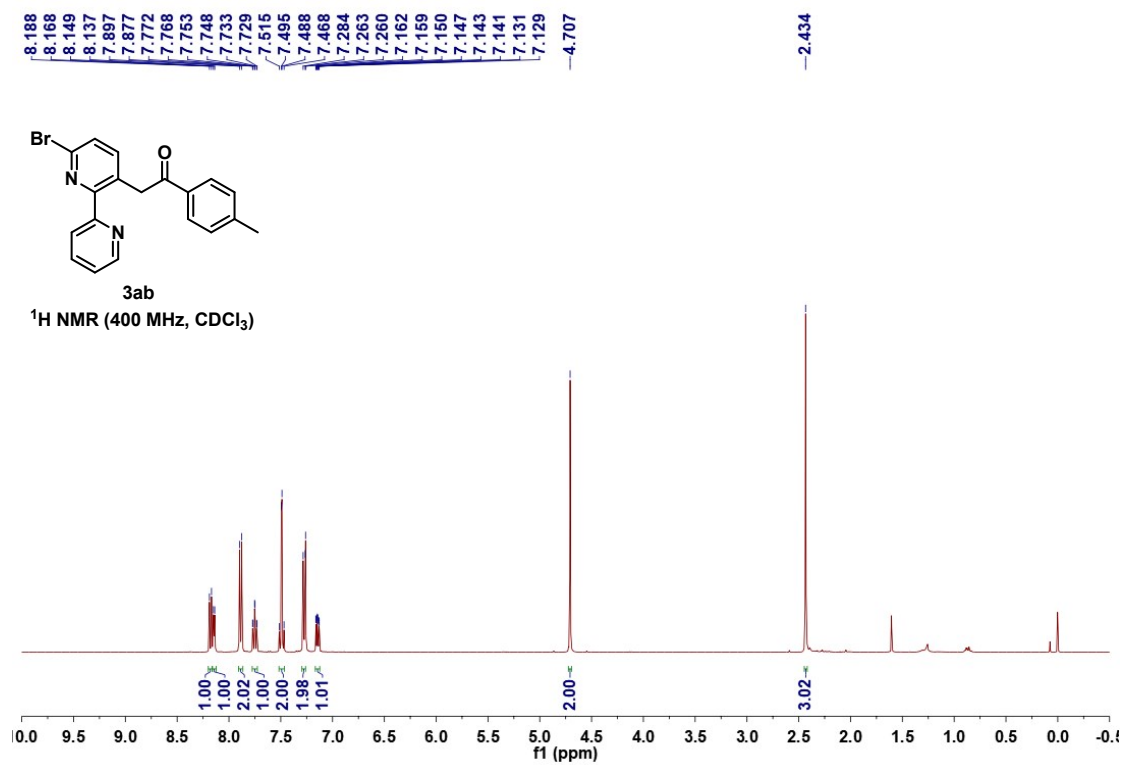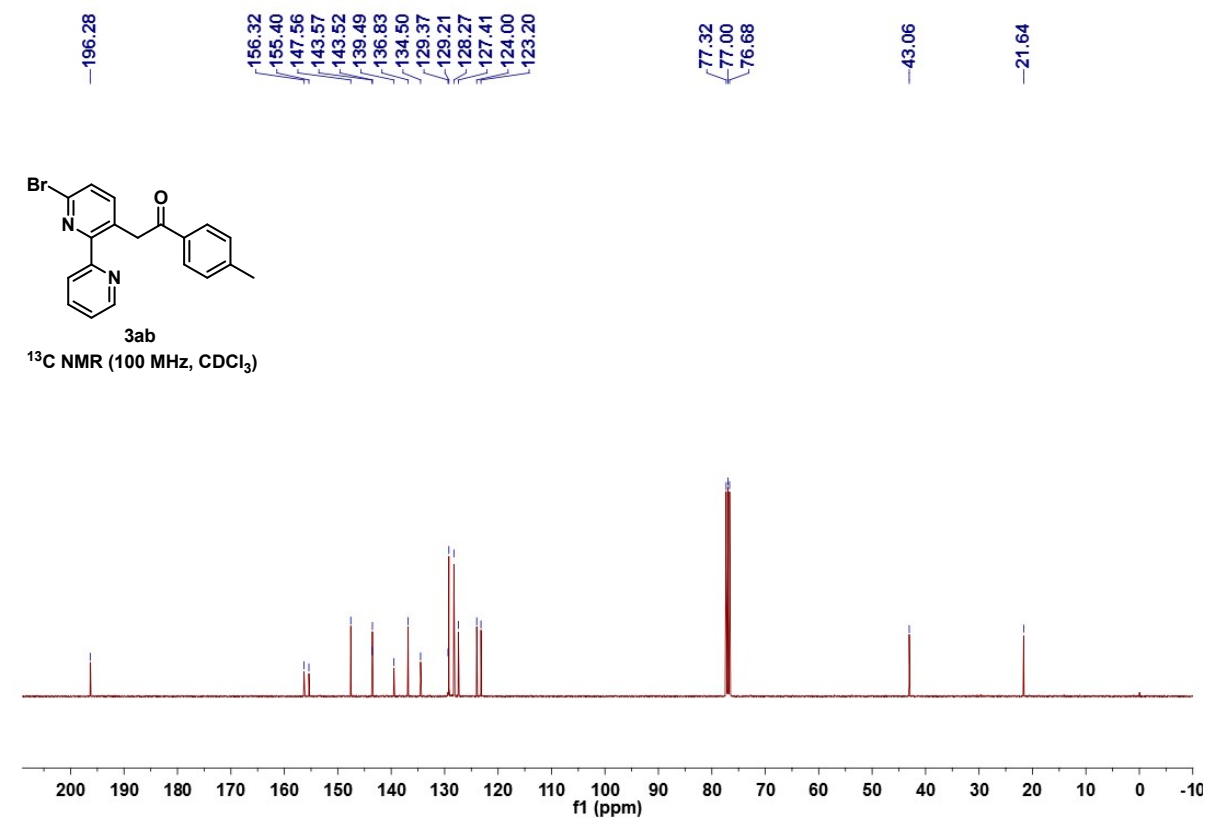

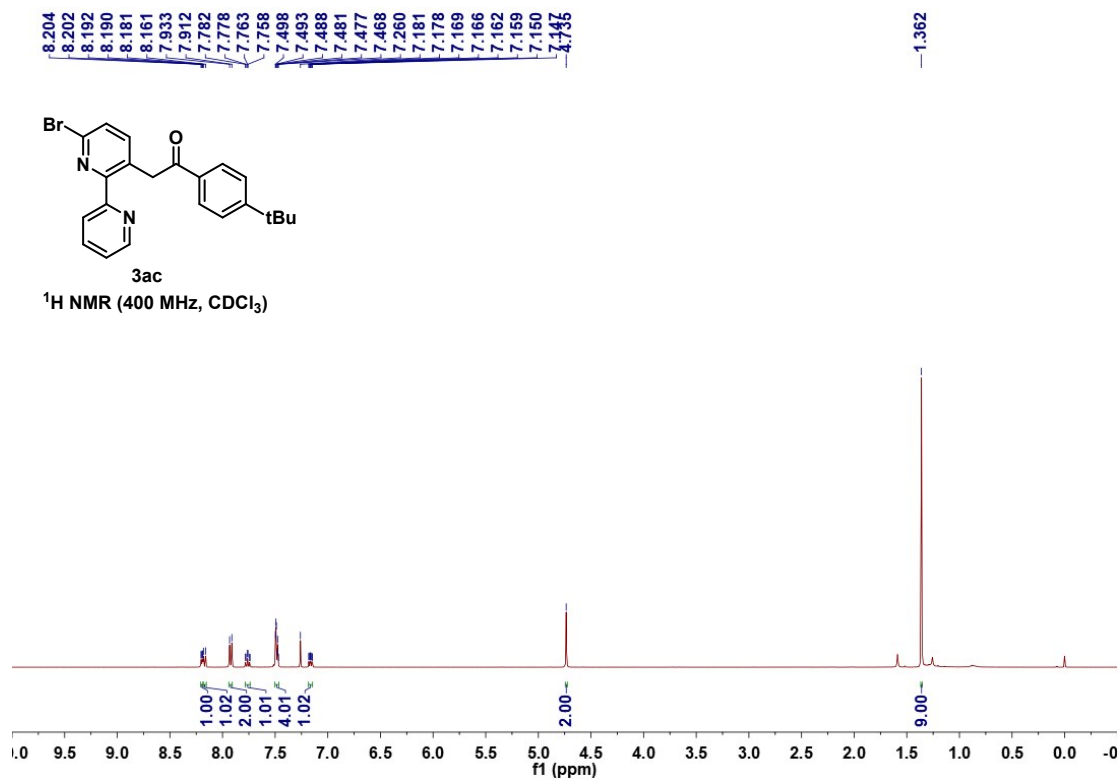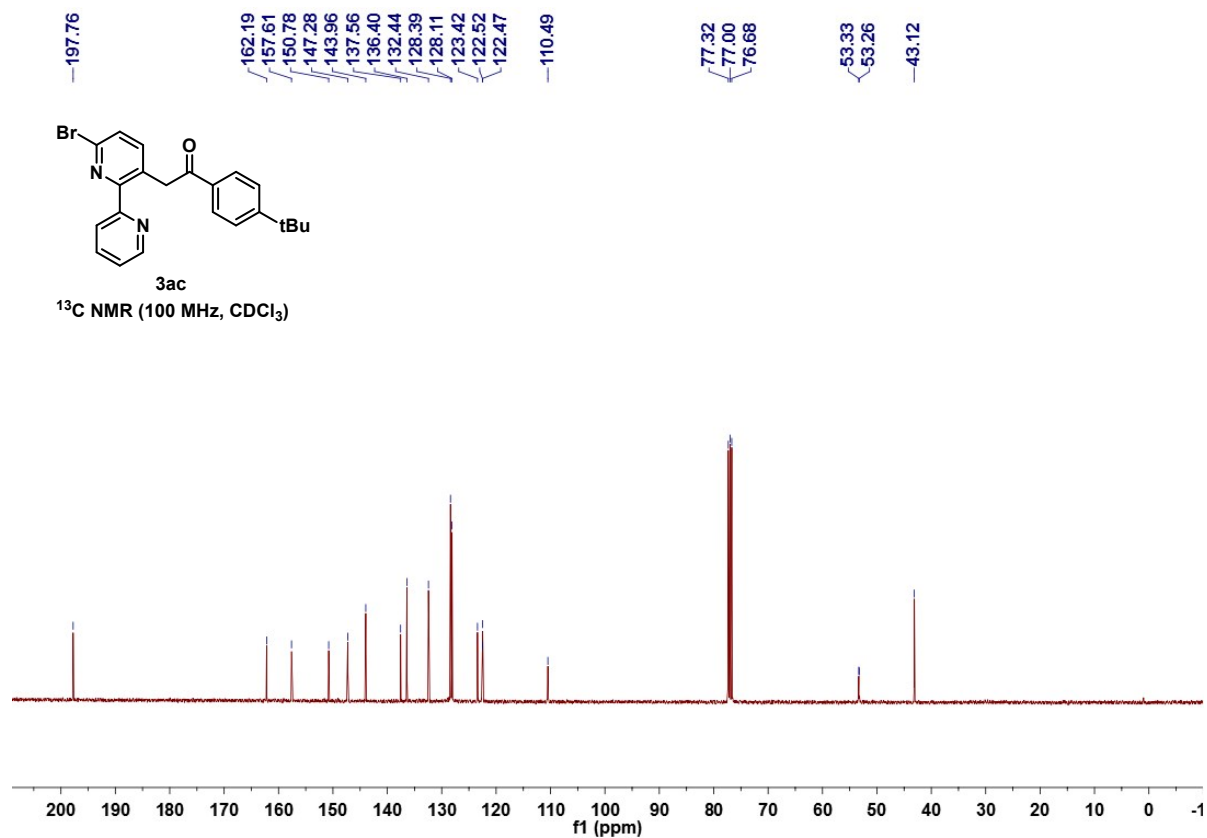



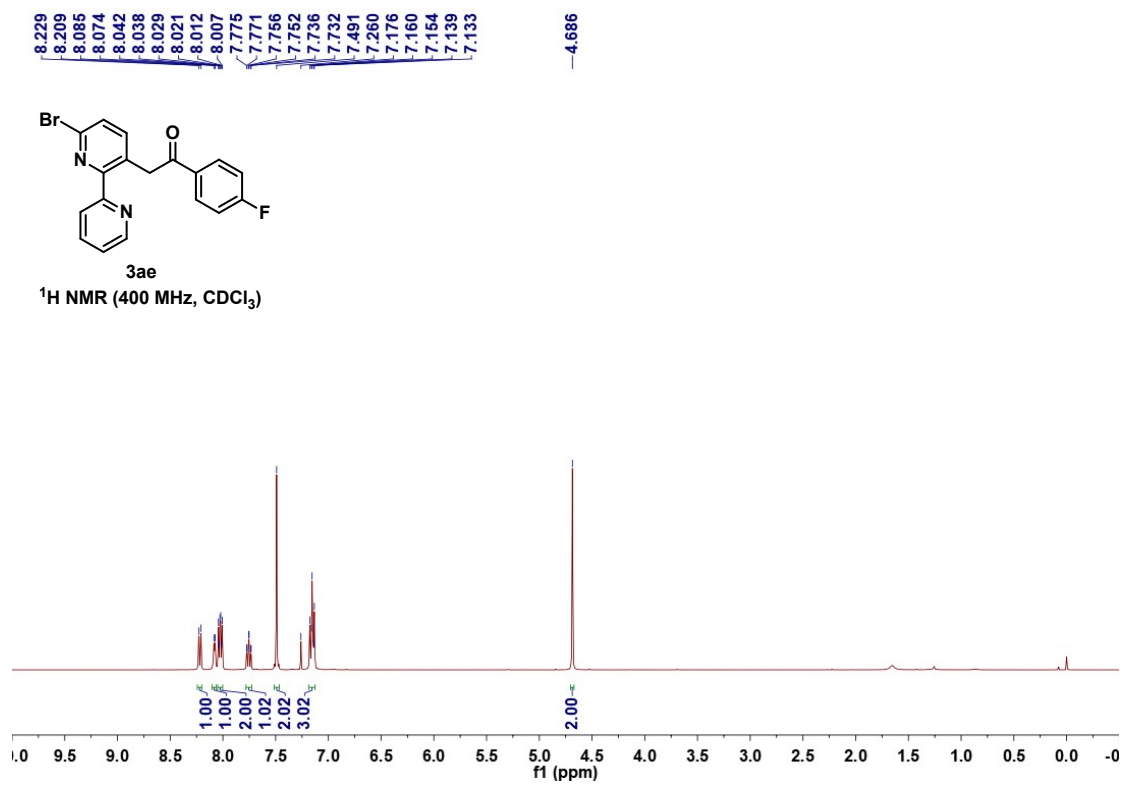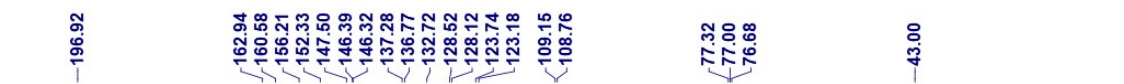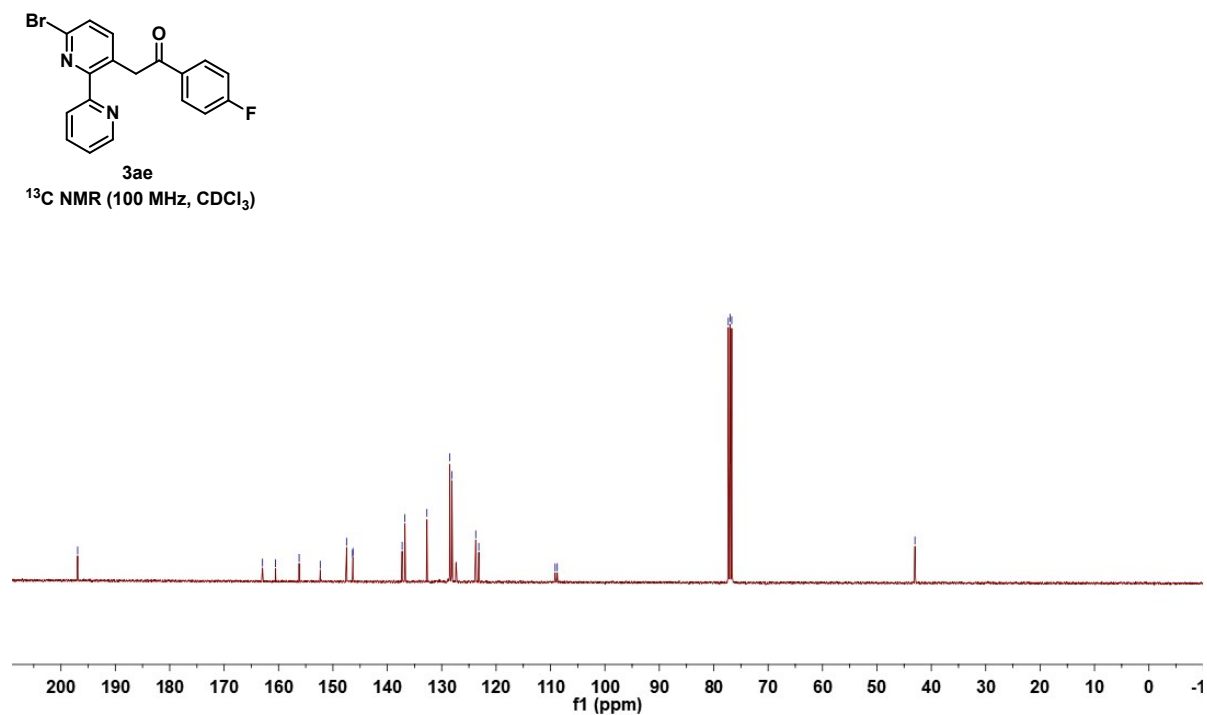

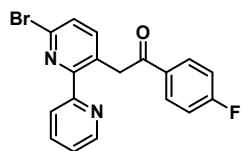

3ae

$^{19}\text{F}$  NMR (376 MHz,  $\text{CDCl}_3$ )

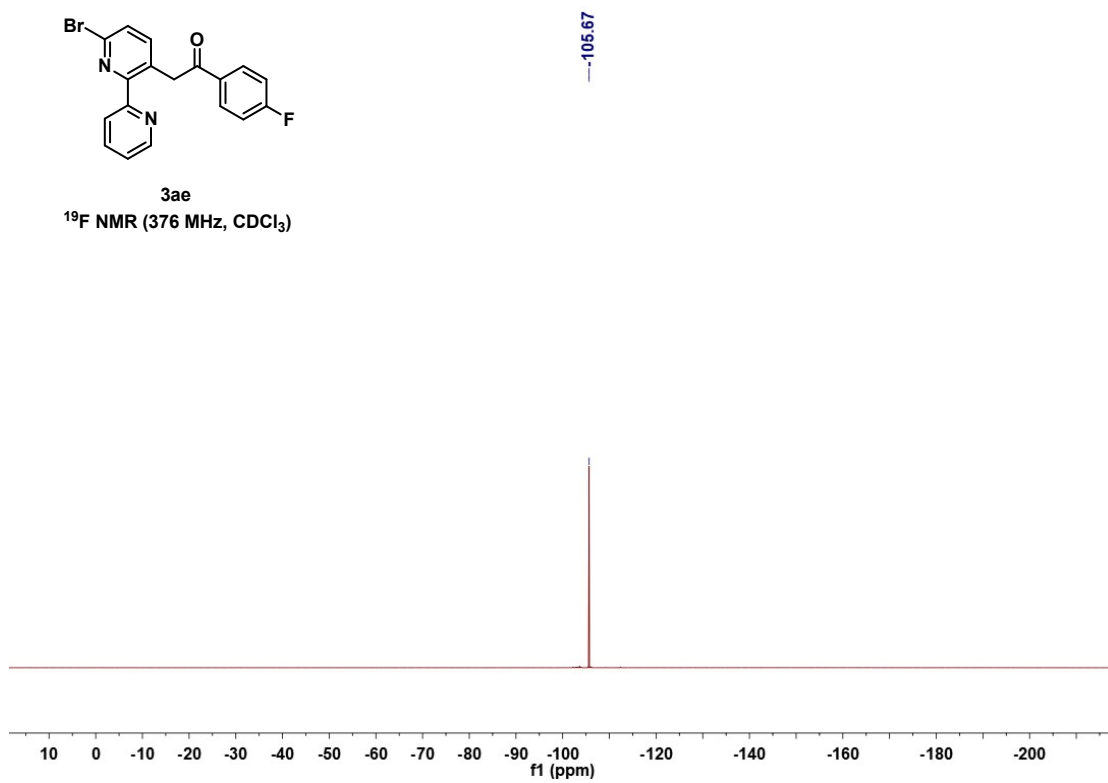

8.245  
8.225  
8.056  
8.046  
7.953  
7.949  
7.936  
7.932  
7.778  
7.773  
7.758  
7.754  
7.739  
7.734  
7.494  
7.475  
7.470  
7.458  
7.453  
7.260  
7.164  
7.161  
7.152  
7.149  
7.145  
7.143  
7.133  
4.671

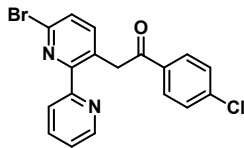

3af

<sup>1</sup>H NMR (400 MHz, CDCl<sub>3</sub>)

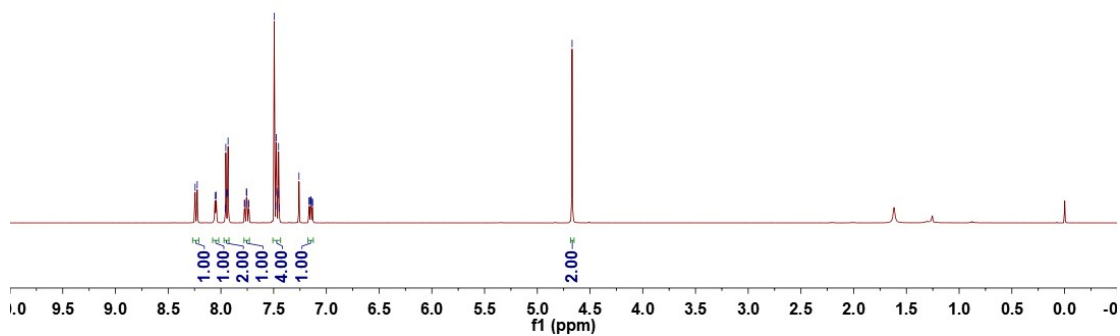

195.39

156.07  
154.99  
147.37  
143.61  
139.69  
139.14  
136.93  
135.51  
129.58  
128.91  
128.86  
127.52  
123.98  
123.35

77.32  
77.00  
76.68

43.33

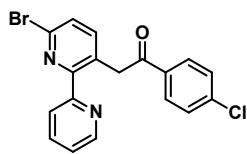

3af

<sup>13</sup>C NMR (100 MHz, CDCl<sub>3</sub>)

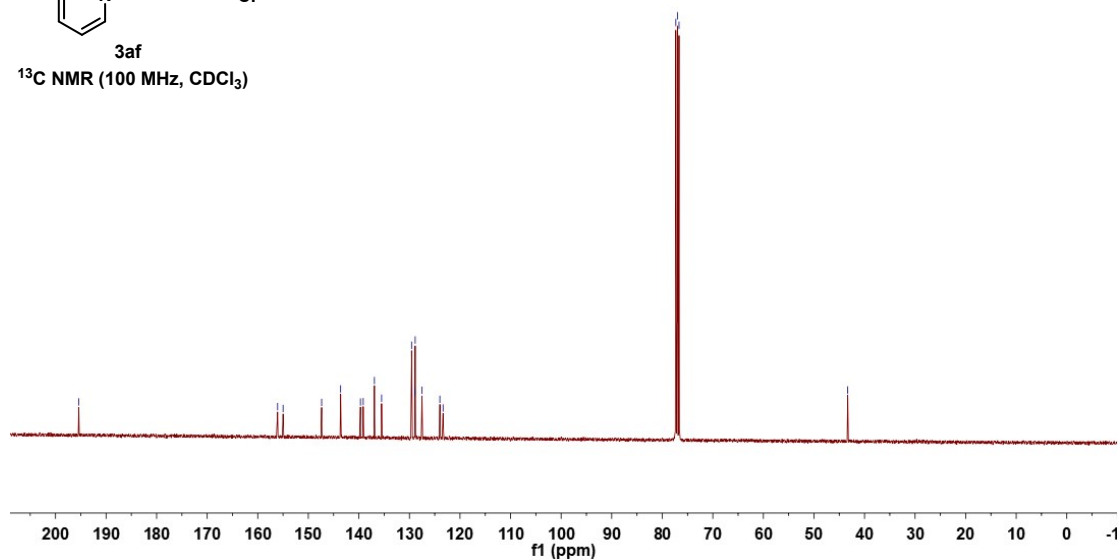

8.290  
8.287  
8.285  
8.269  
8.267  
8.265  
8.123  
8.103  
7.970  
7.968  
7.966  
7.964  
7.958  
7.956  
7.954  
7.952  
7.950  
7.780  
7.776  
7.760  
7.741  
7.708  
7.260  
7.157  
7.154  
7.145  
7.142  
7.138  
7.136  
4.786

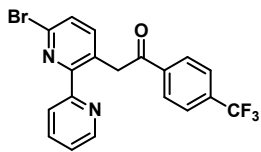

3ag

<sup>1</sup>H NMR (400 MHz, CDCl<sub>3</sub>)

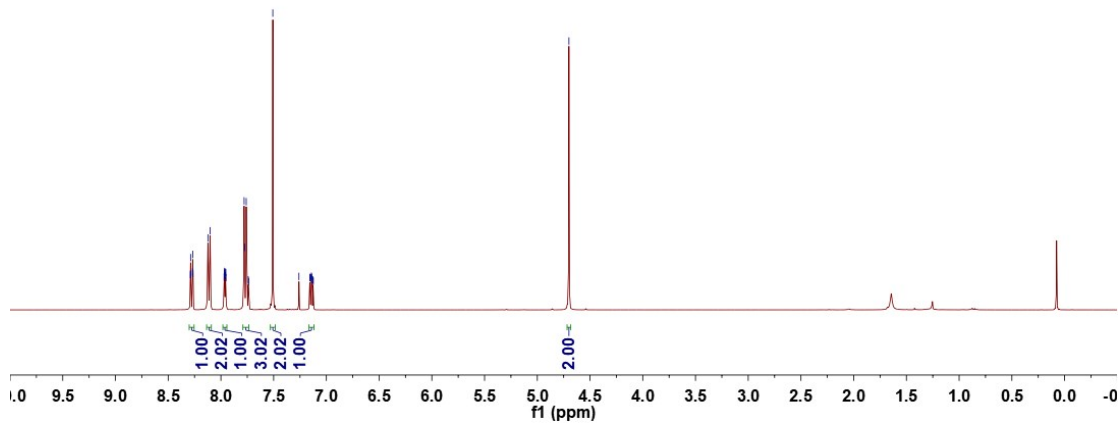

195.46  
155.94  
154.75  
147.21  
143.65  
140.08  
139.79  
136.95  
134.54  
134.21  
133.89  
133.56  
128.65  
128.45  
127.73  
127.57  
125.60  
125.02  
123.97  
123.42  
122.31  
119.60

77.32  
77.00  
76.68

43.74

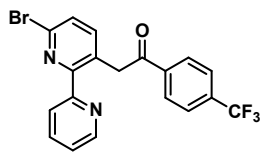

3ag

<sup>13</sup>C NMR (100 MHz, CDCl<sub>3</sub>)

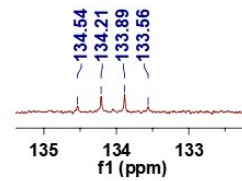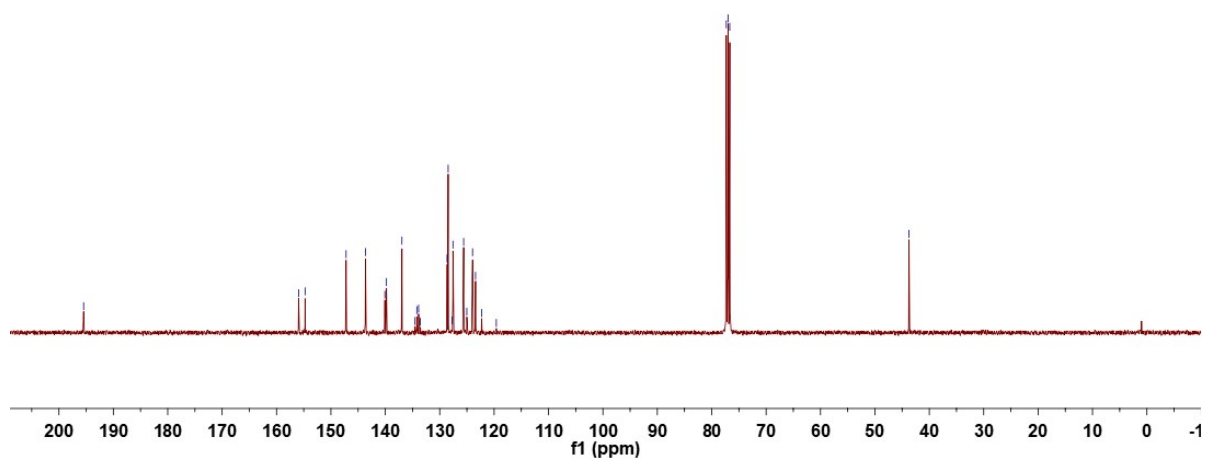



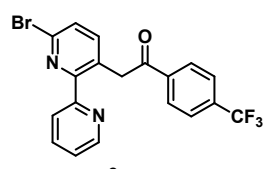

3ag  
<sup>19</sup>F NMR (376 MHz, CDCl<sub>3</sub>)

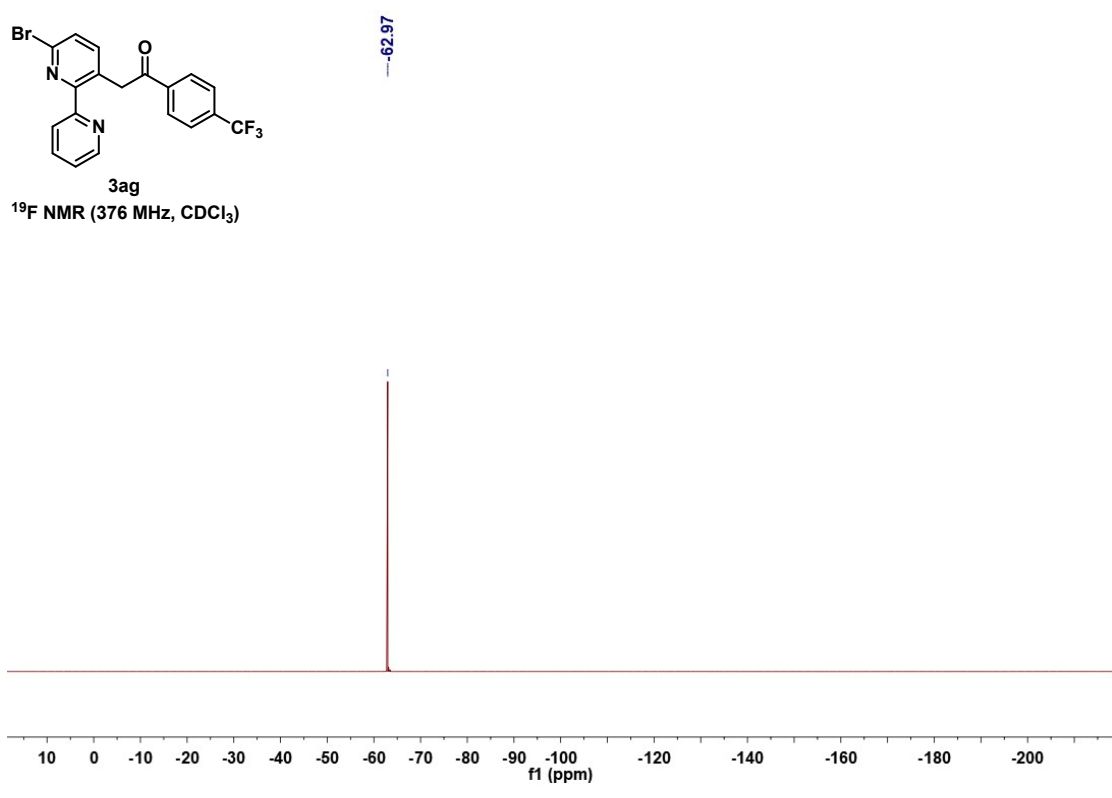

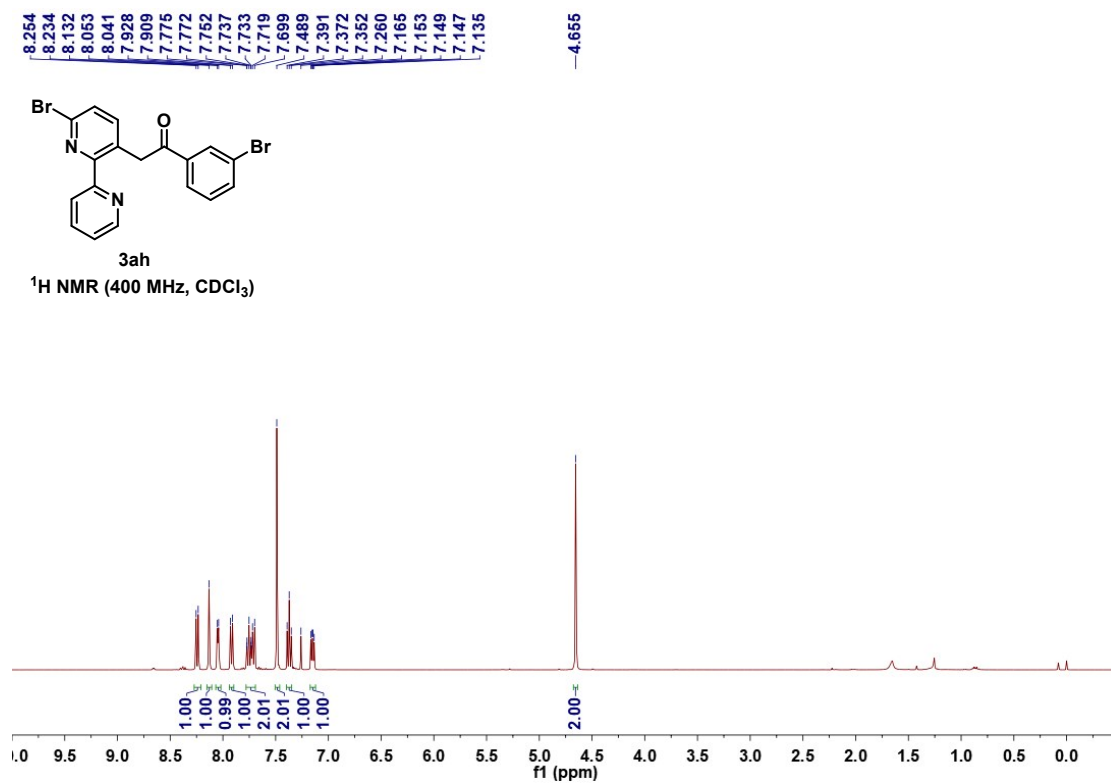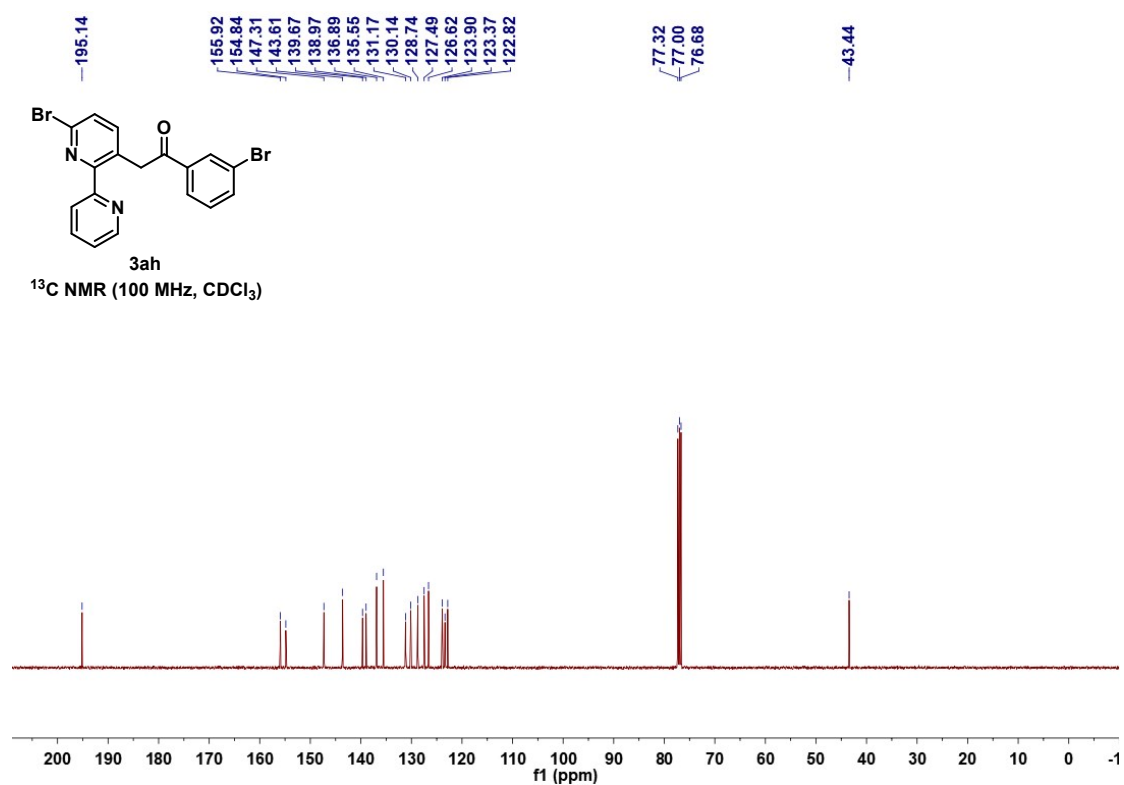

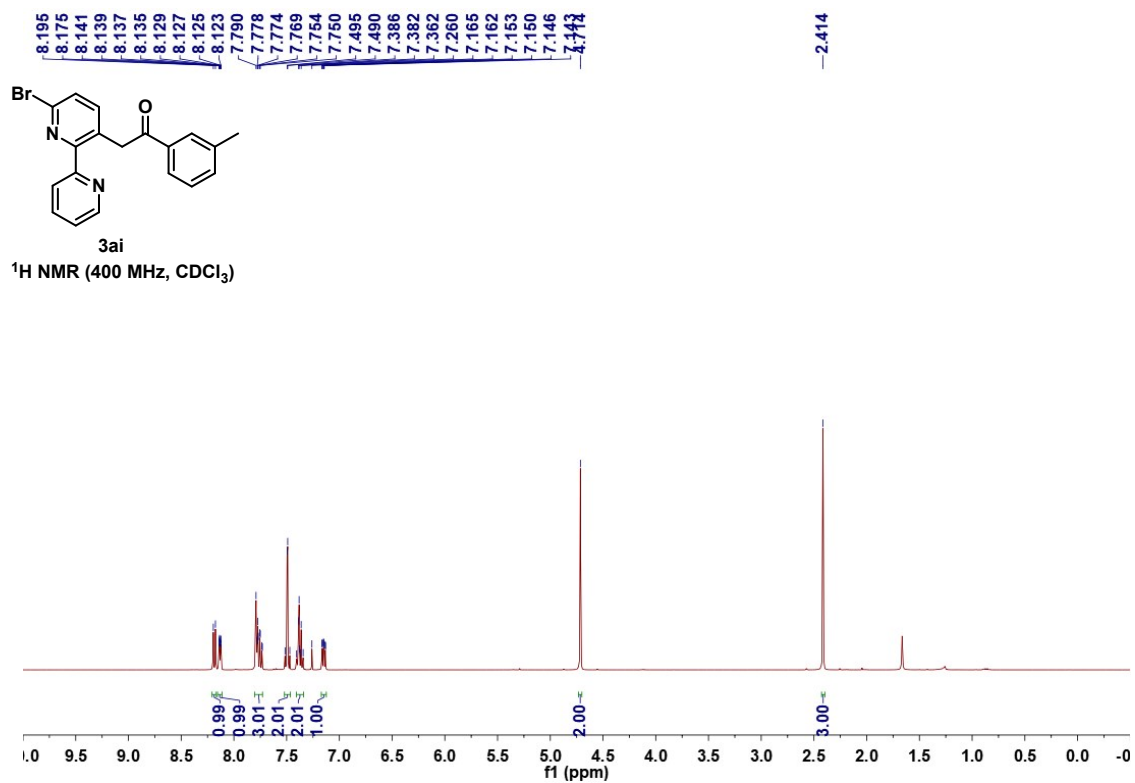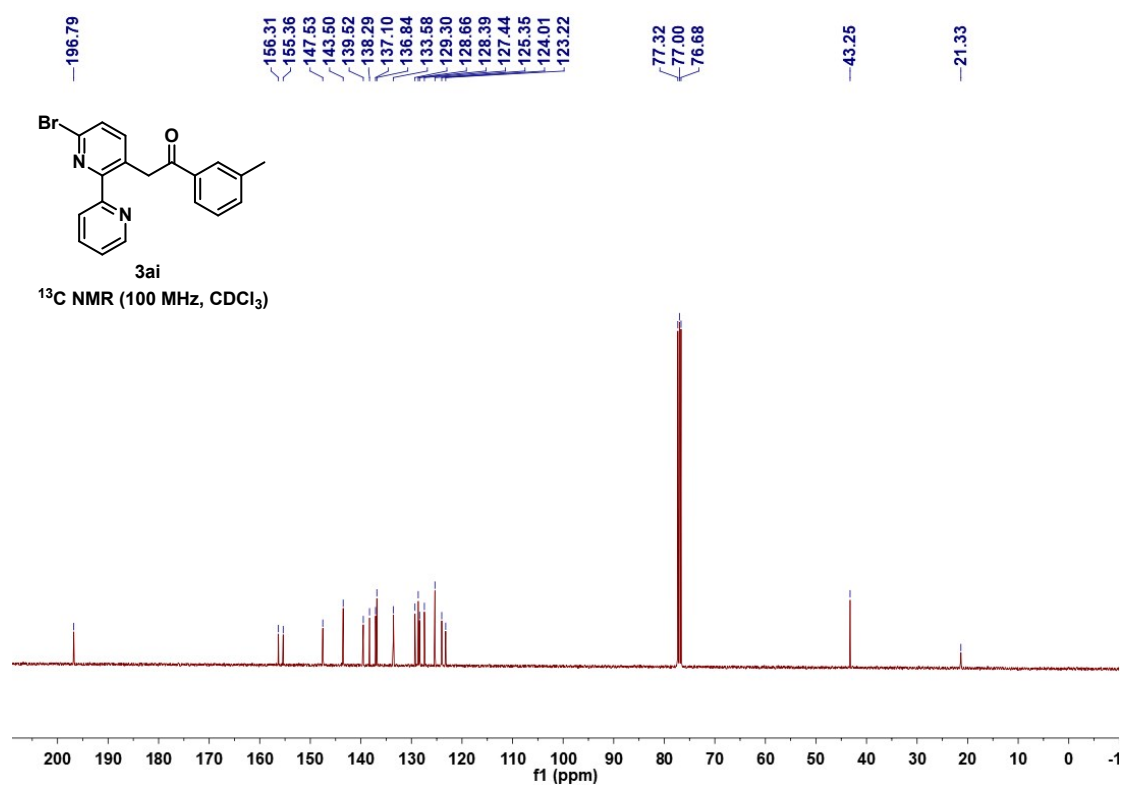

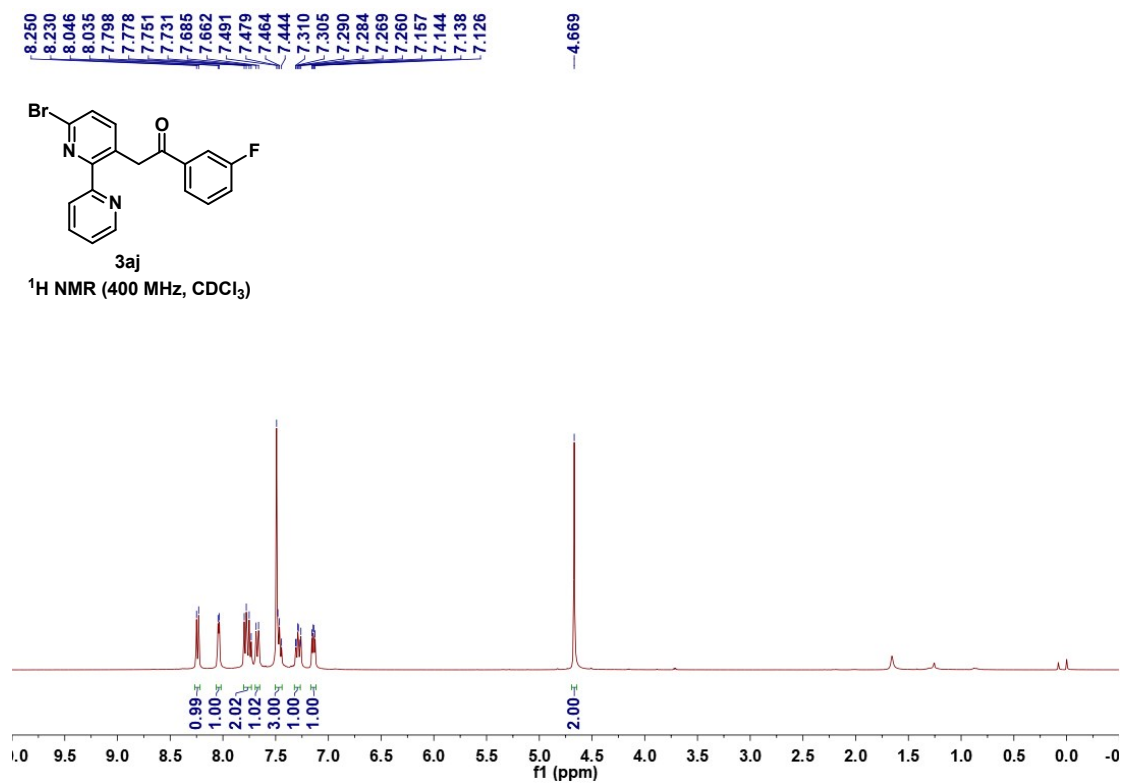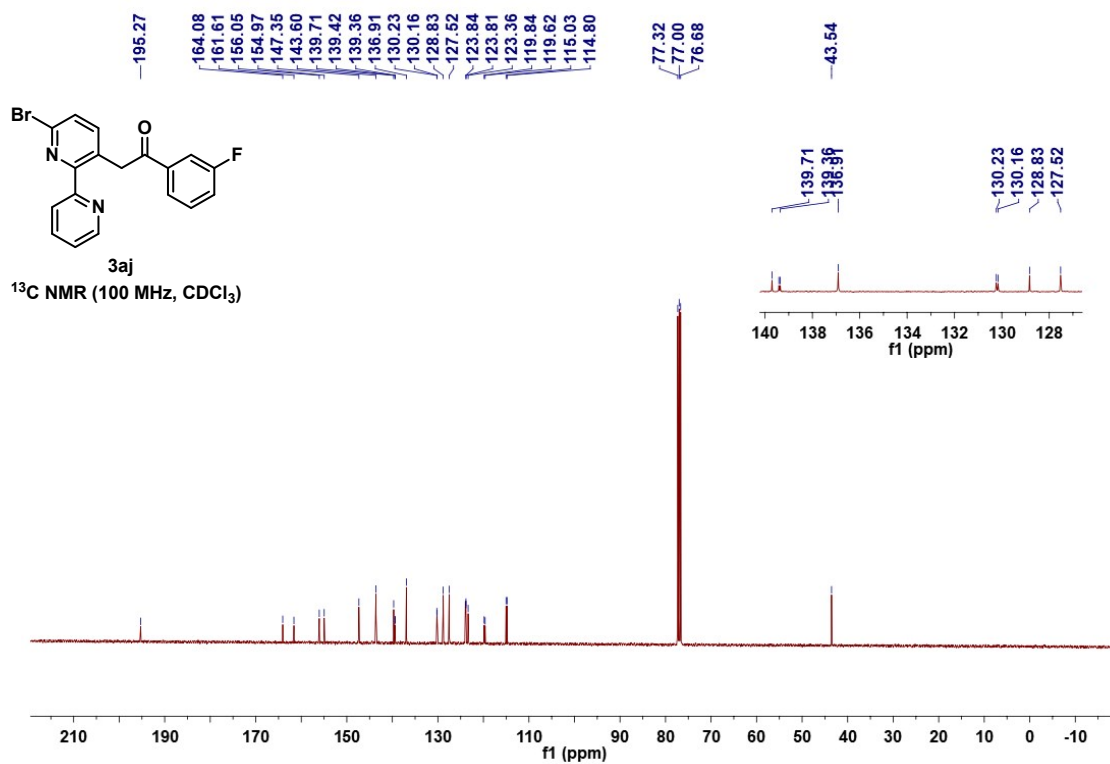

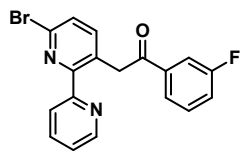

3aj

<sup>19</sup>F NMR (376 MHz, CDCl<sub>3</sub>)

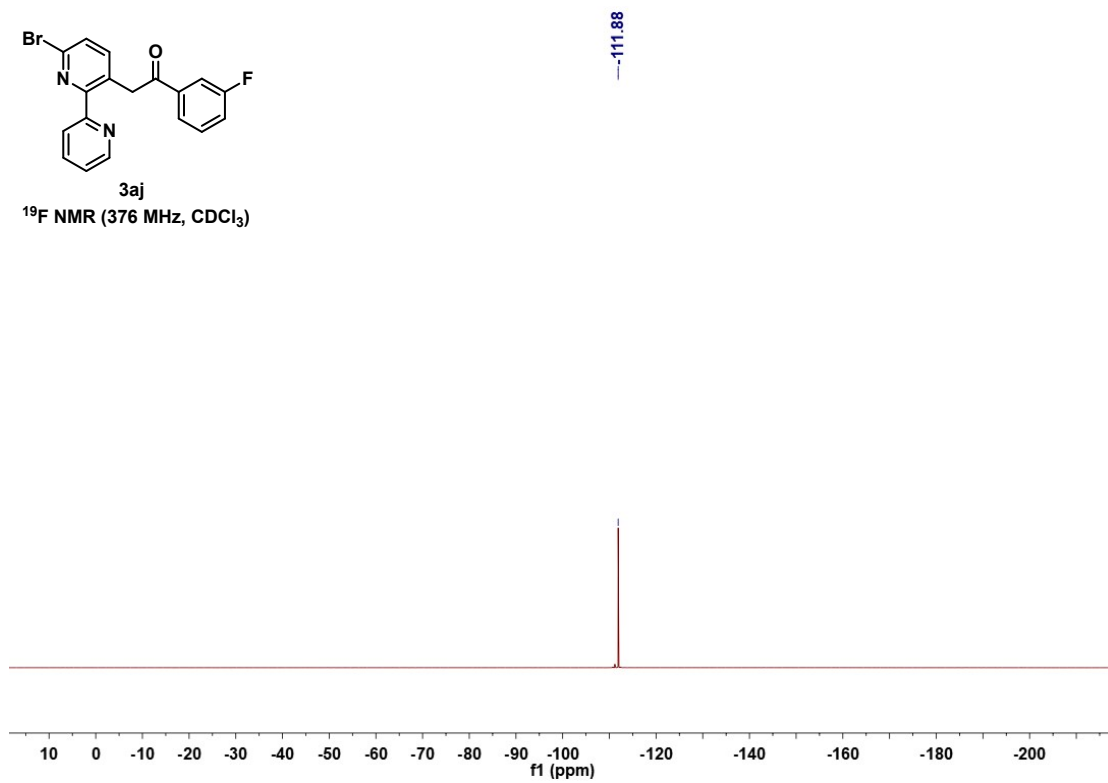

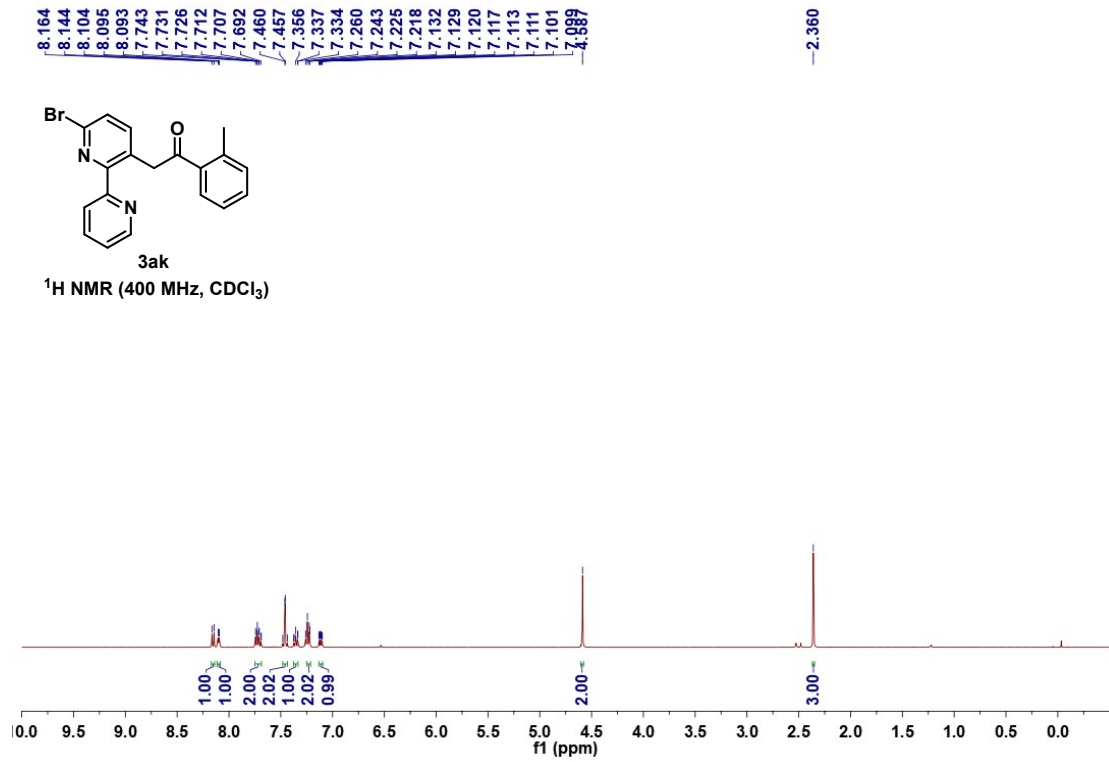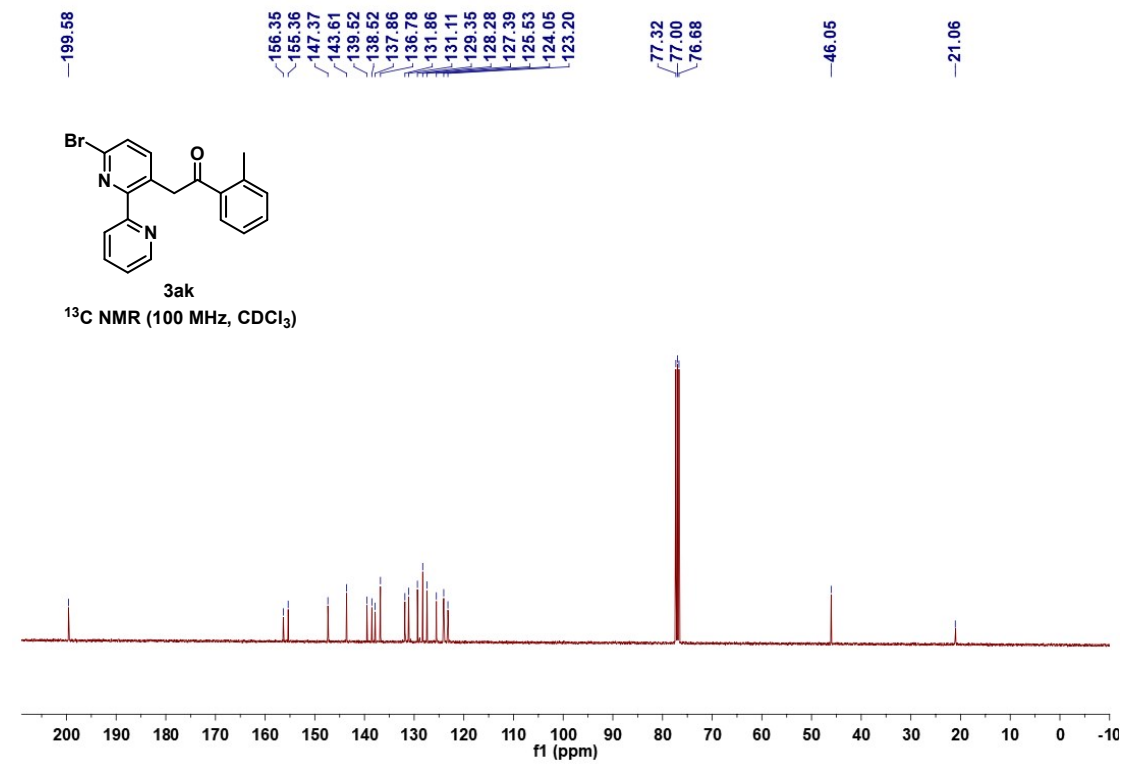

8.227  
8.207  
8.011  
8.001  
7.999  
7.828  
7.824  
7.738  
7.734  
7.531  
7.520  
7.511  
7.493  
7.473  
7.273  
7.271  
7.254  
7.253  
7.186  
7.169  
7.157  
7.138  
7.136  
7.126  
7.123  
7.119  
7.115  
4.635  
4.626

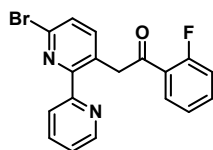

3al

<sup>1</sup>H NMR (400 MHz, CDCl<sub>3</sub>)

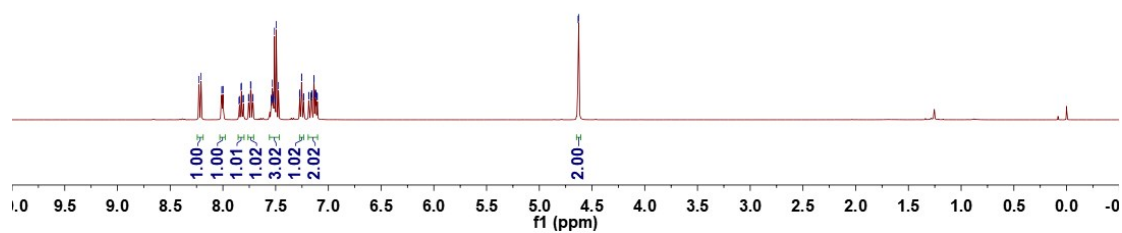

194.90  
162.67  
160.15  
155.96  
155.06  
147.22  
143.67  
139.52  
136.74  
134.07  
133.98  
130.89  
130.86  
128.97  
127.40  
126.15  
123.82  
123.17  
116.59  
116.35  
77.32  
77.00  
76.68  
48.06

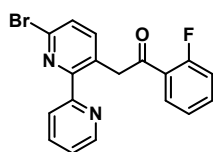

3al

<sup>13</sup>C NMR (100 MHz, CDCl<sub>3</sub>)

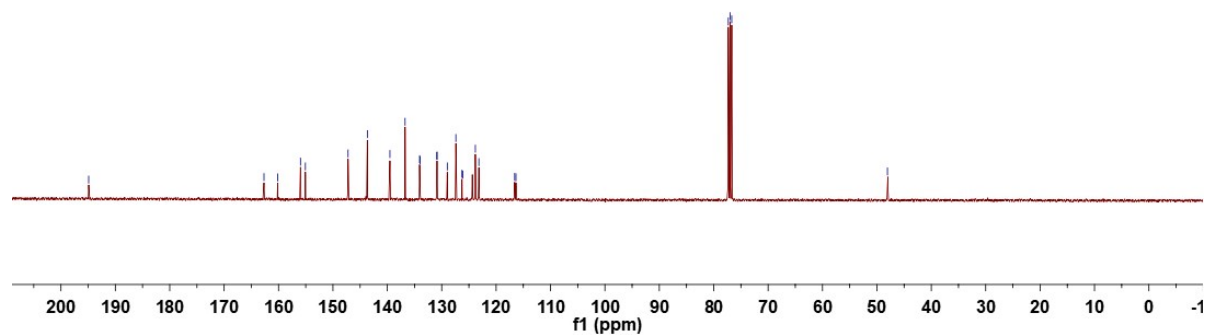

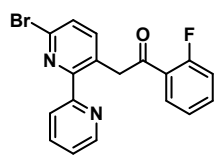

3al

$^{19}\text{F}$  NMR (376 MHz,  $\text{CDCl}_3$ )

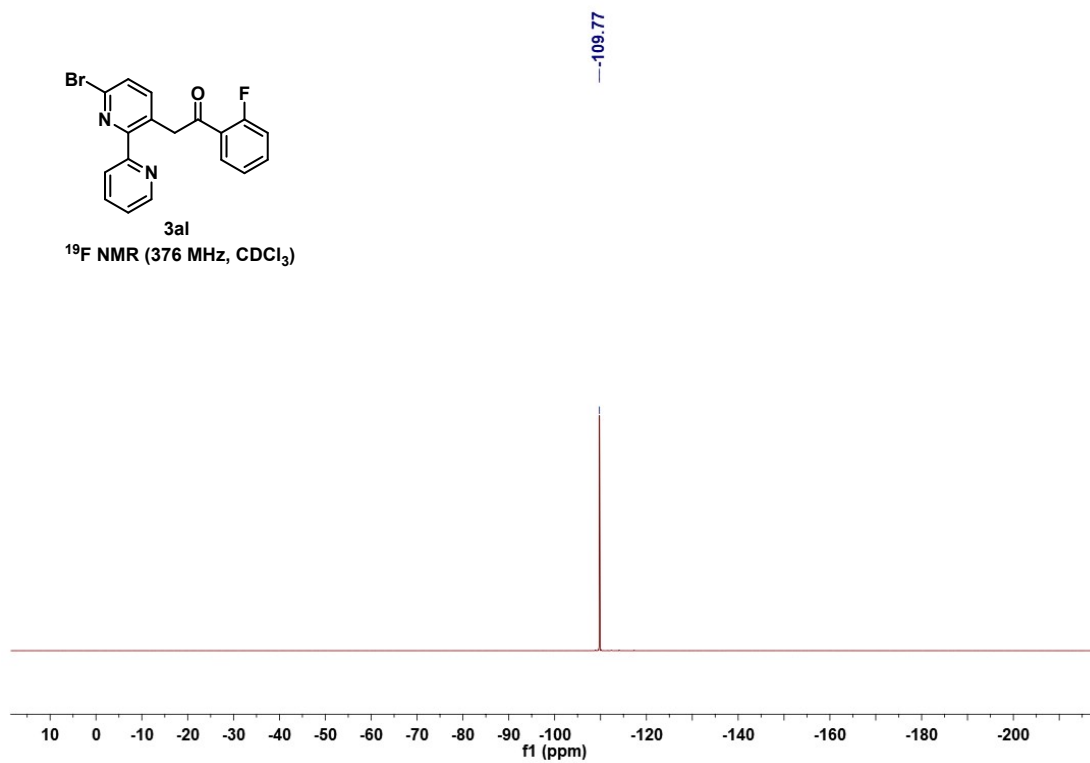



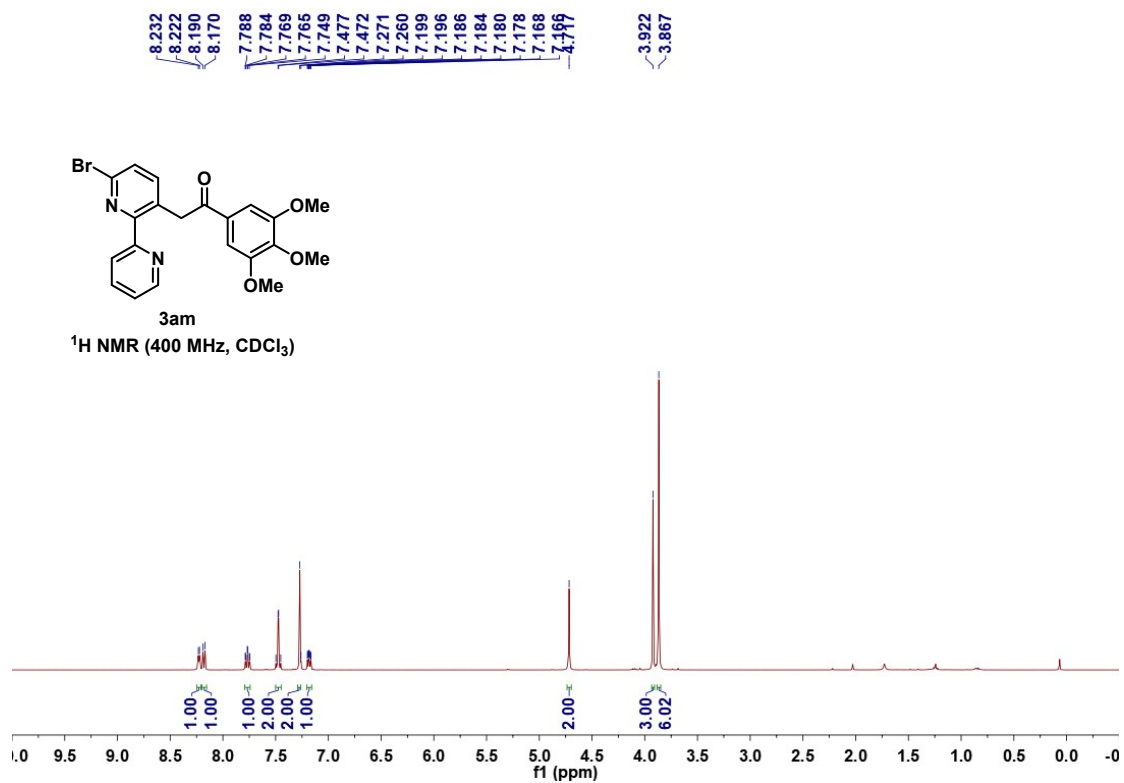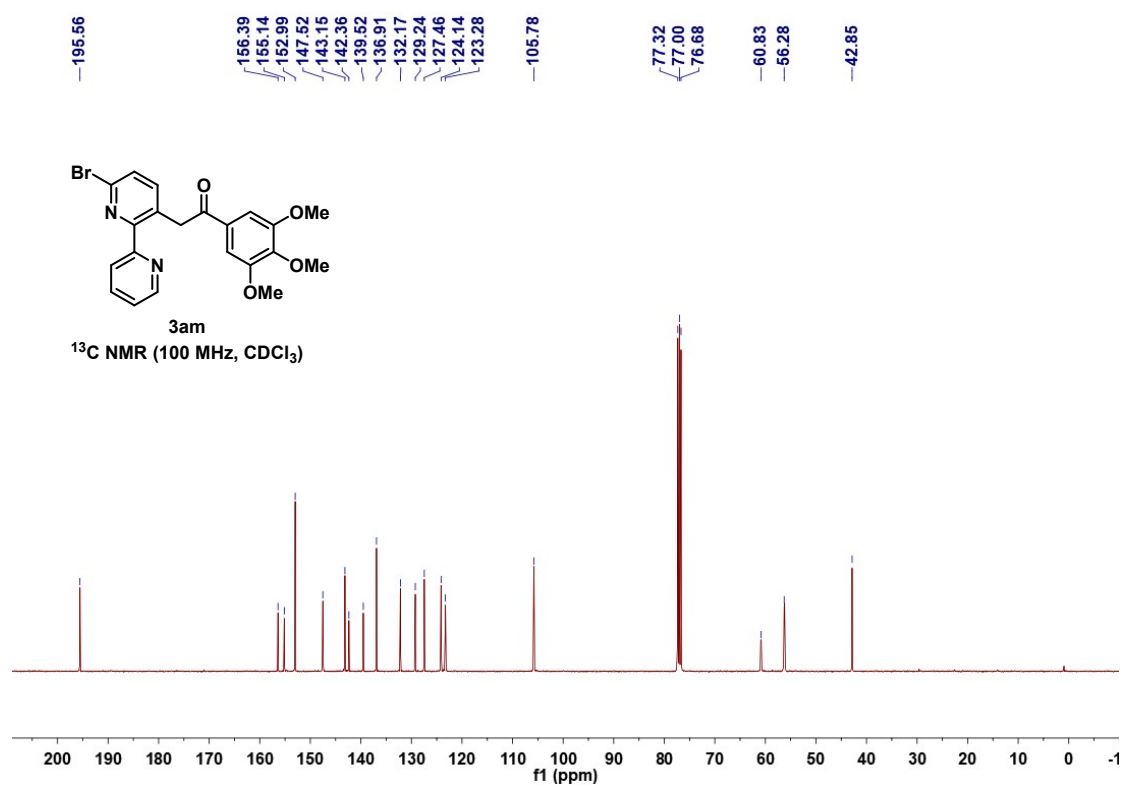

8.474  
8.454  
8.450  
8.216  
8.196  
8.013  
7.993  
7.978  
7.899  
7.895  
7.882  
7.880  
7.720  
7.716  
7.575  
7.555  
7.531  
7.524  
7.512  
7.507  
7.504  
7.493  
7.260  
7.066  
7.053  
7.051  
7.037

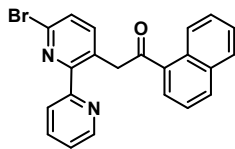

3an  
<sup>1</sup>H NMR (400 MHz, CDCl<sub>3</sub>)

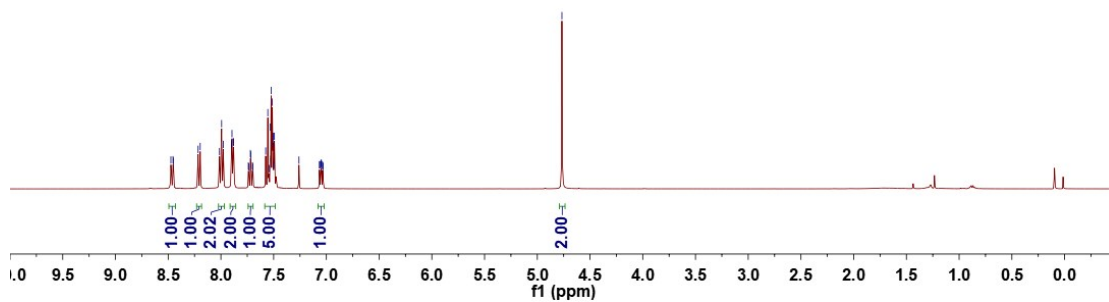

199.57  
156.25  
155.47  
147.55  
143.66  
139.63  
136.76  
136.11  
133.92  
132.37  
130.17  
129.22  
128.19  
127.64  
127.45  
126.98  
126.37  
124.23  
124.01  
123.91  
77.00  
76.68  
46.69

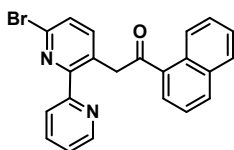

3an  
<sup>13</sup>C NMR (100 MHz, CDCl<sub>3</sub>)

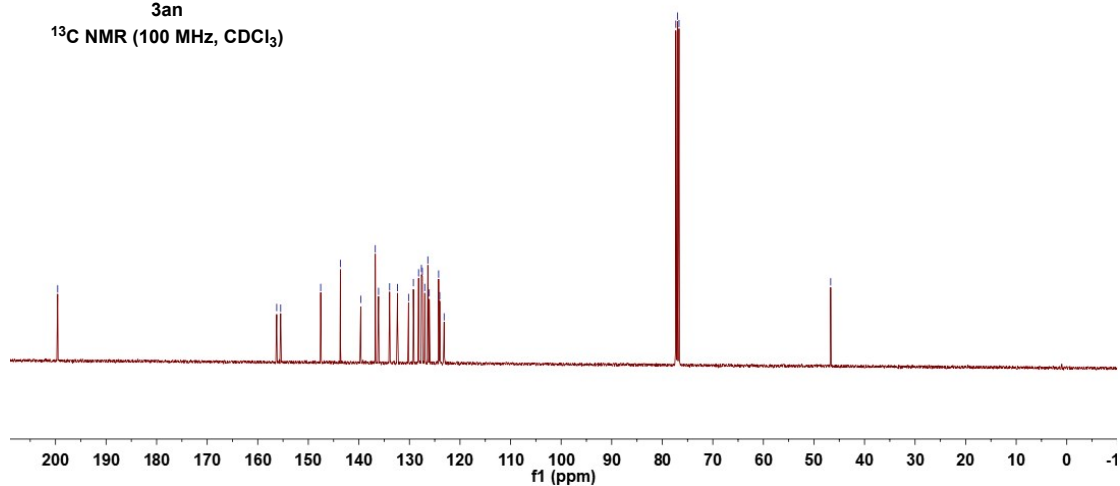

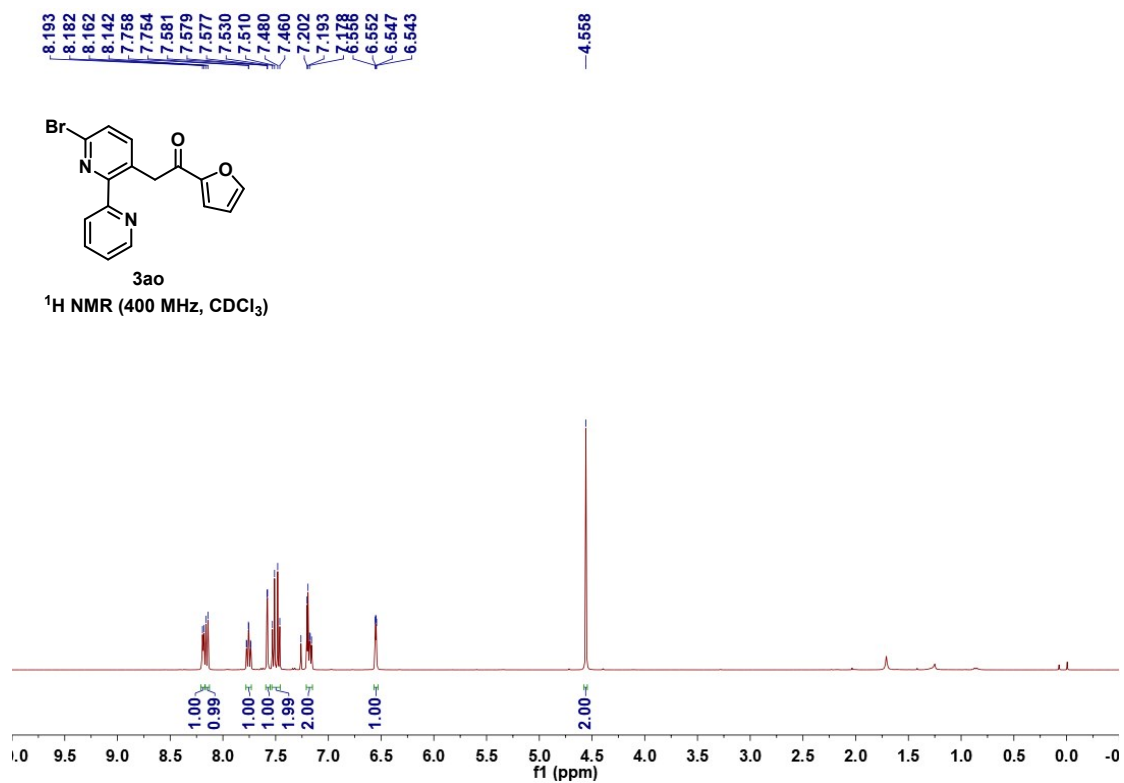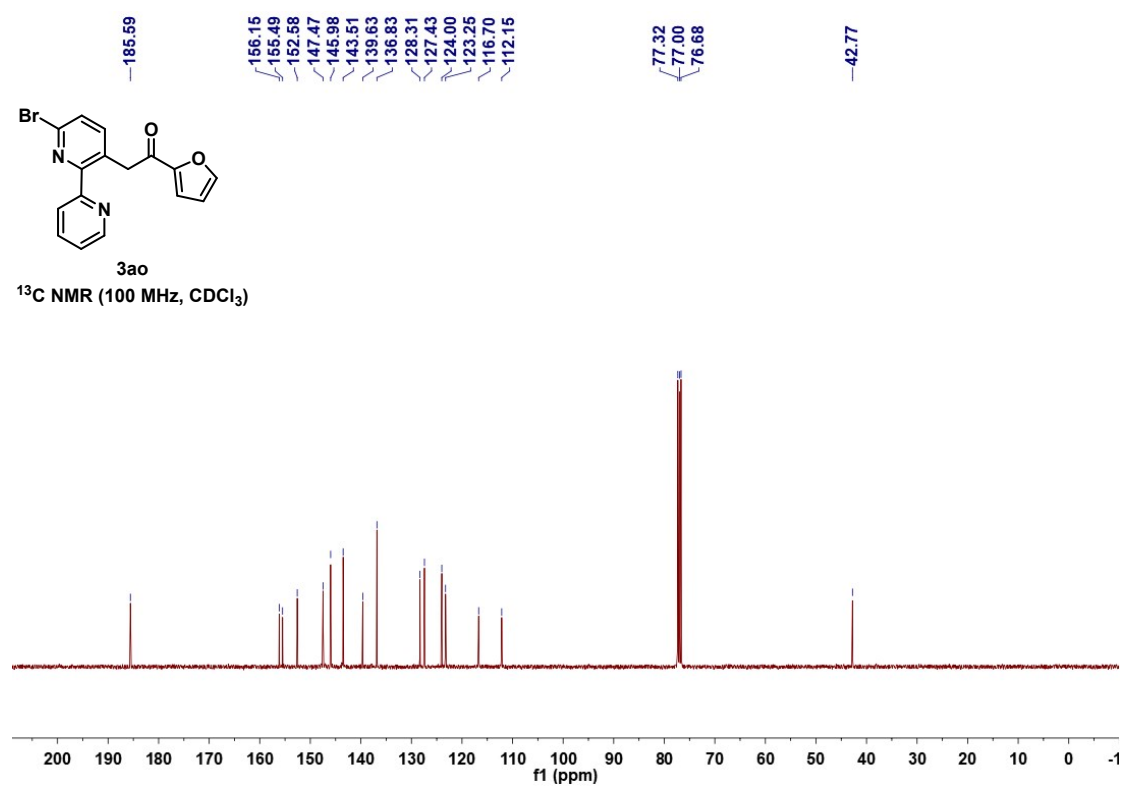

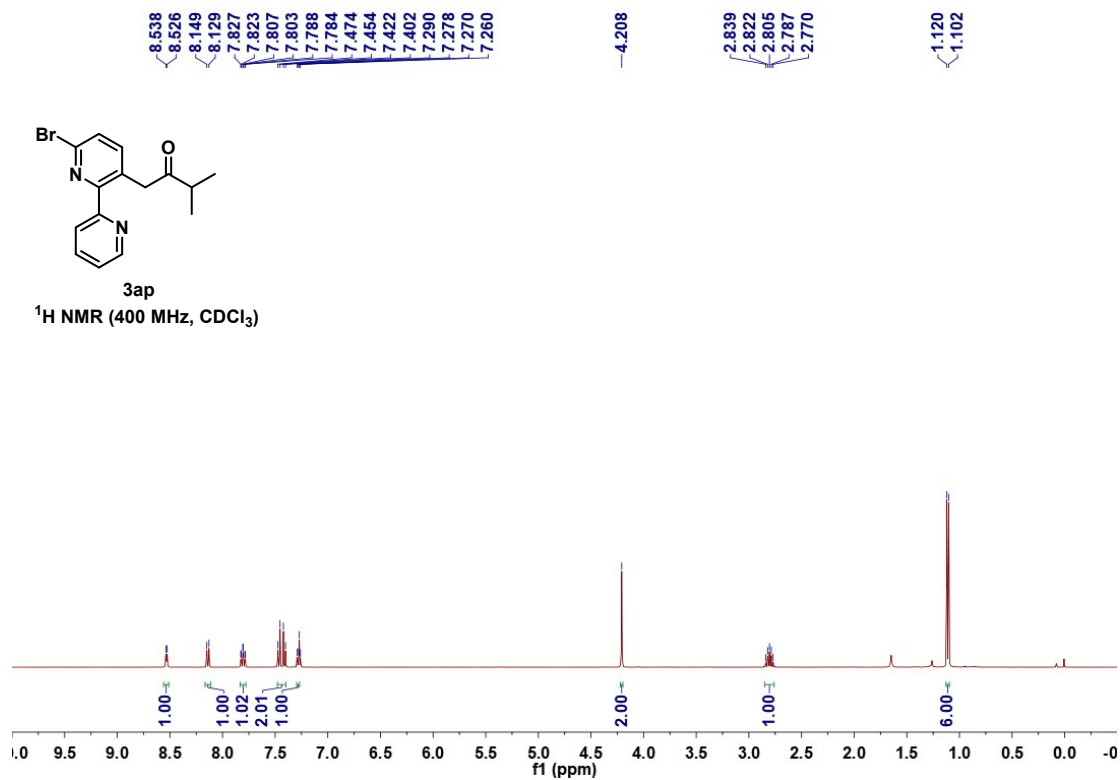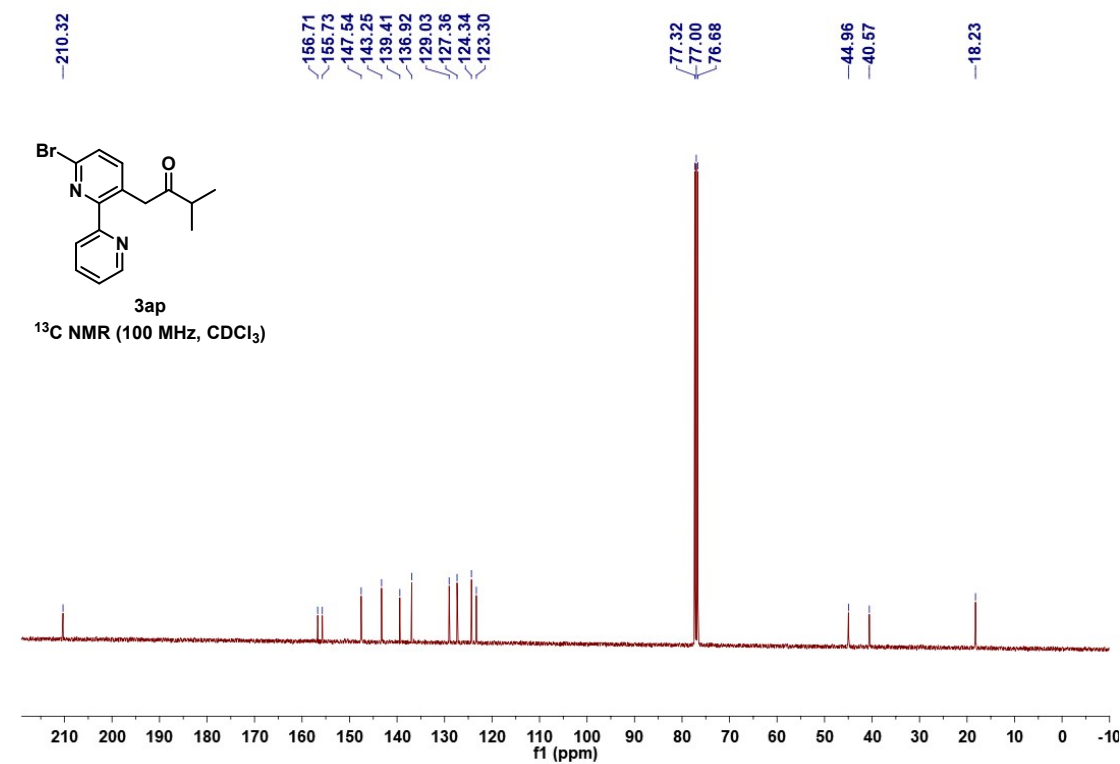

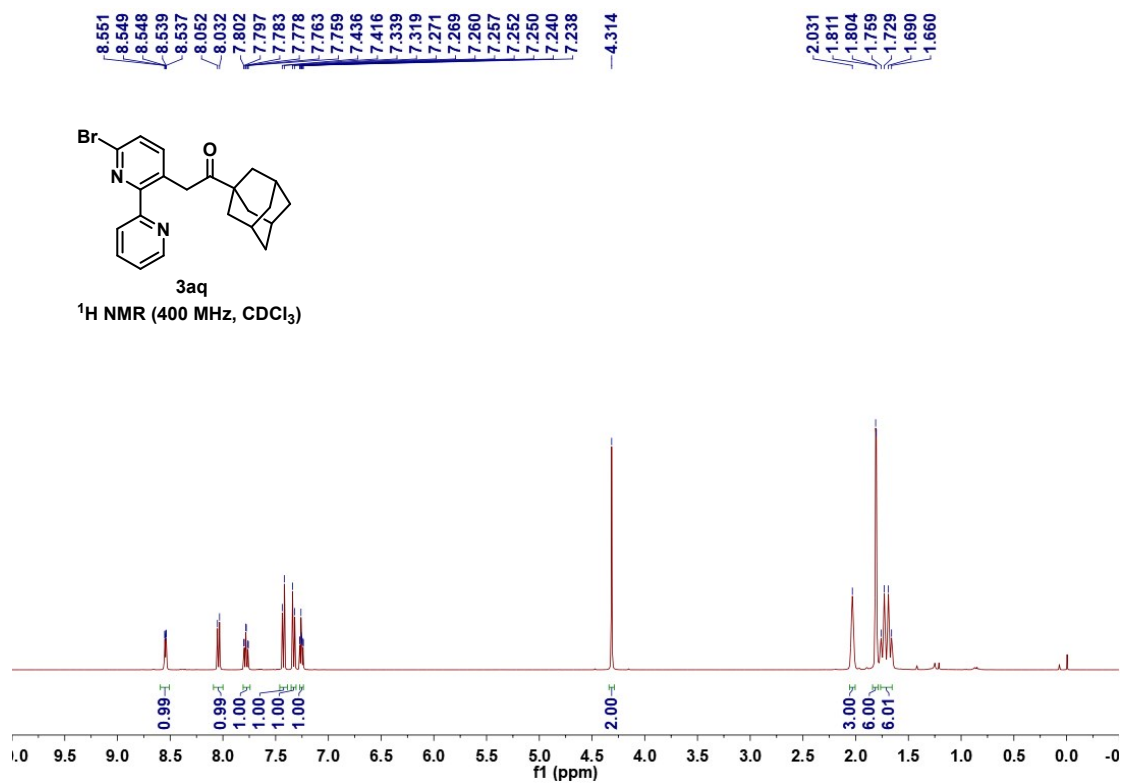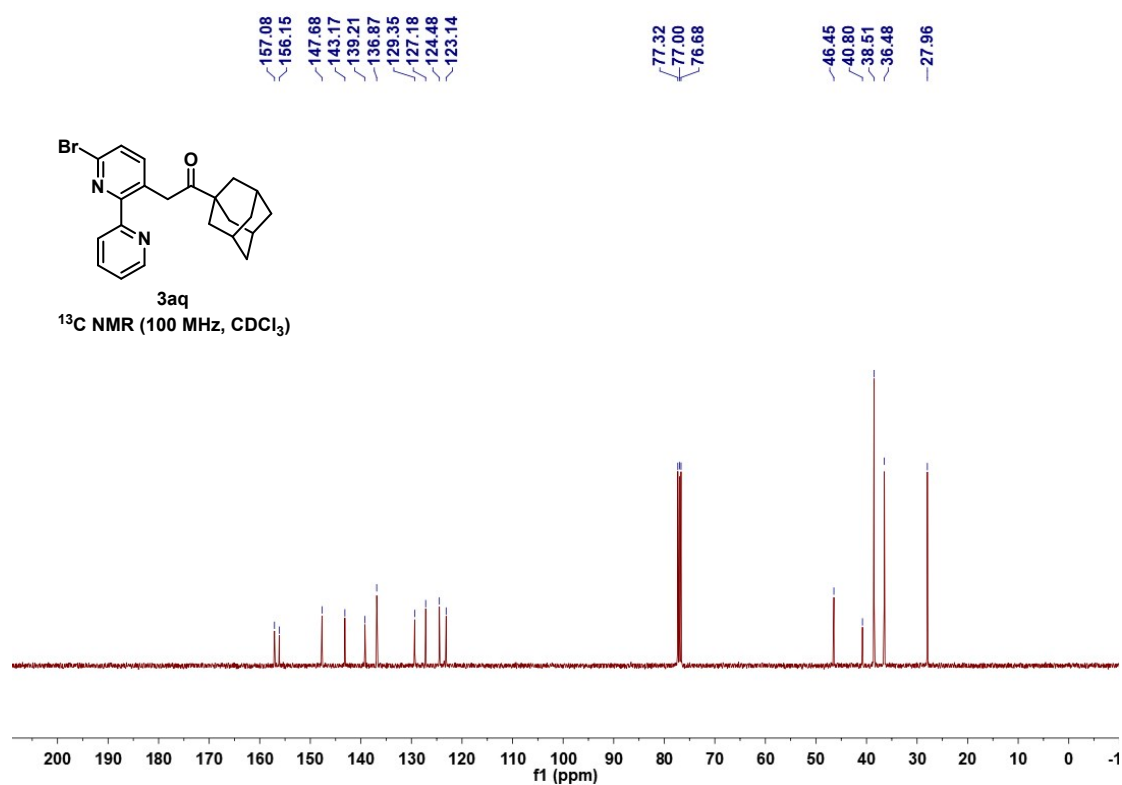

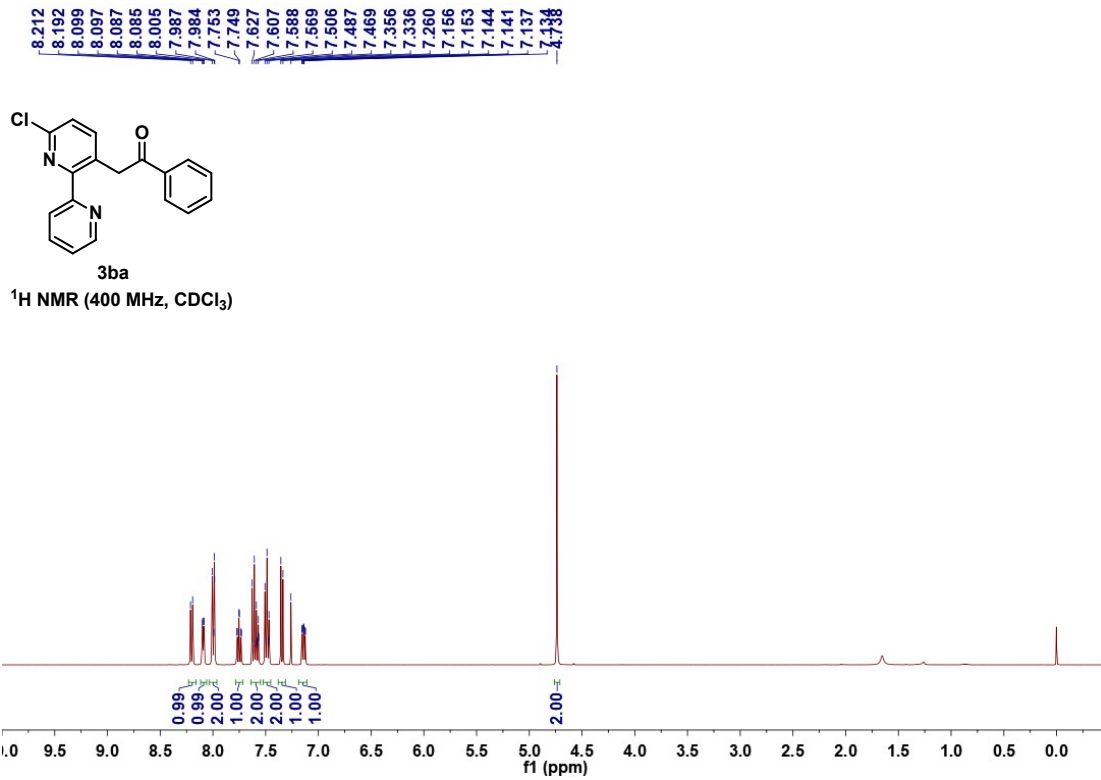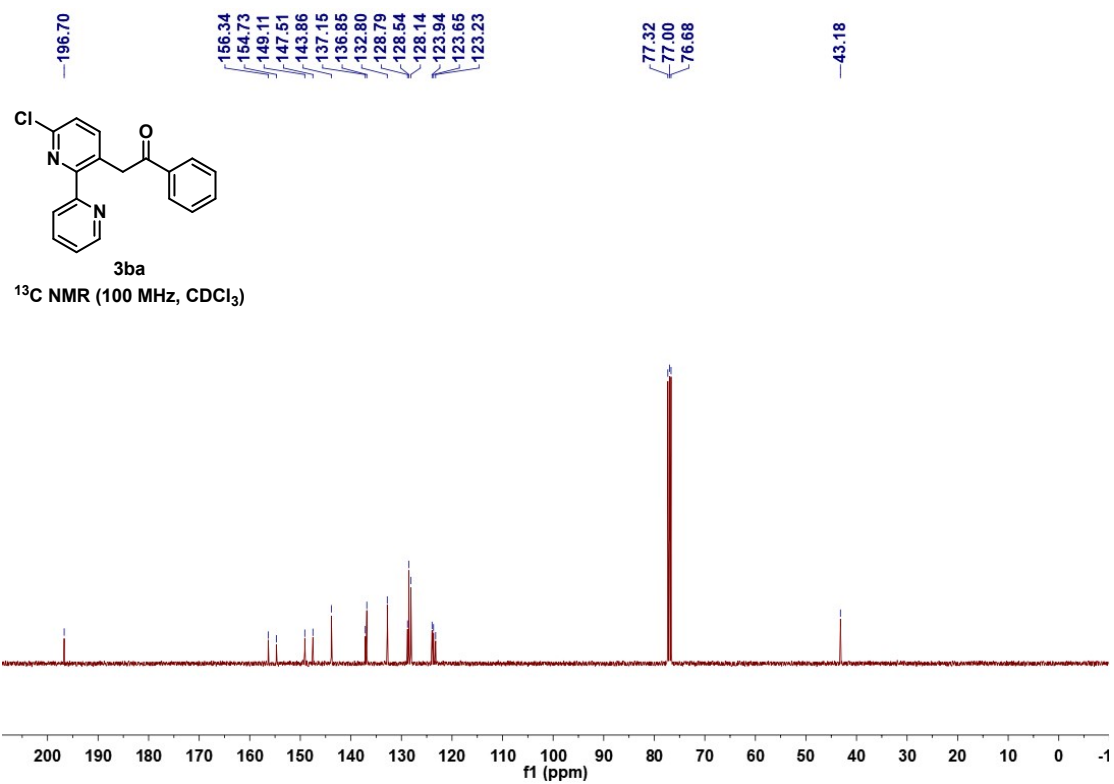

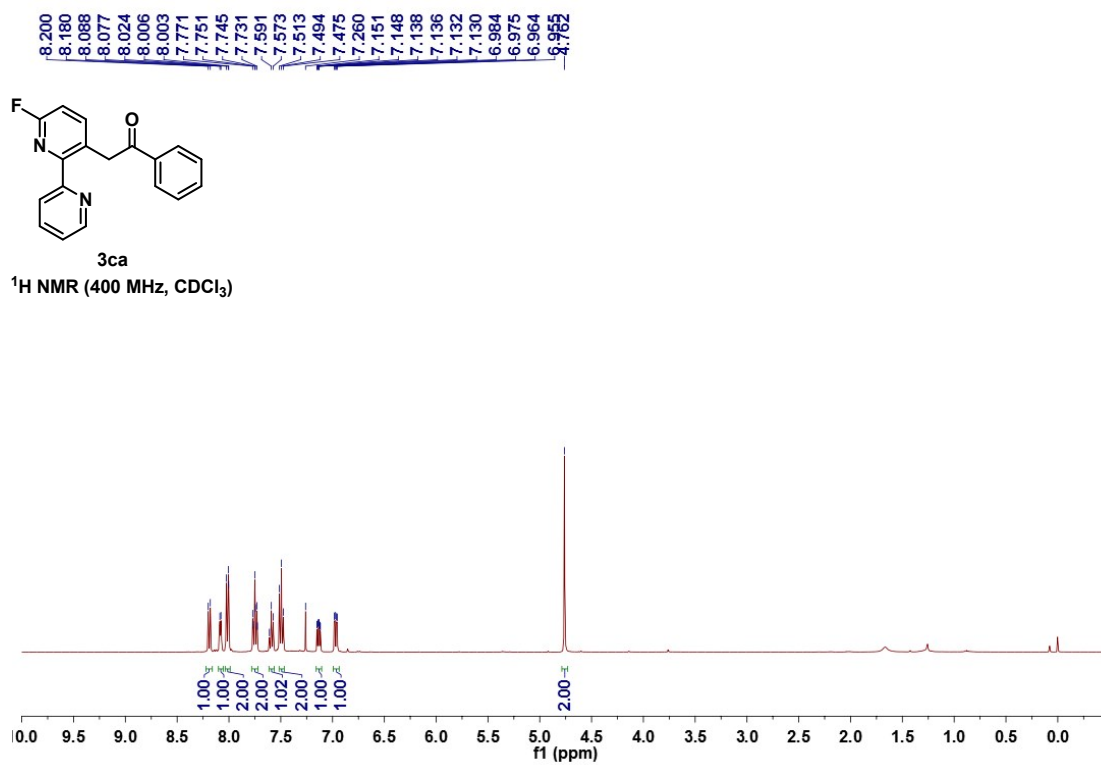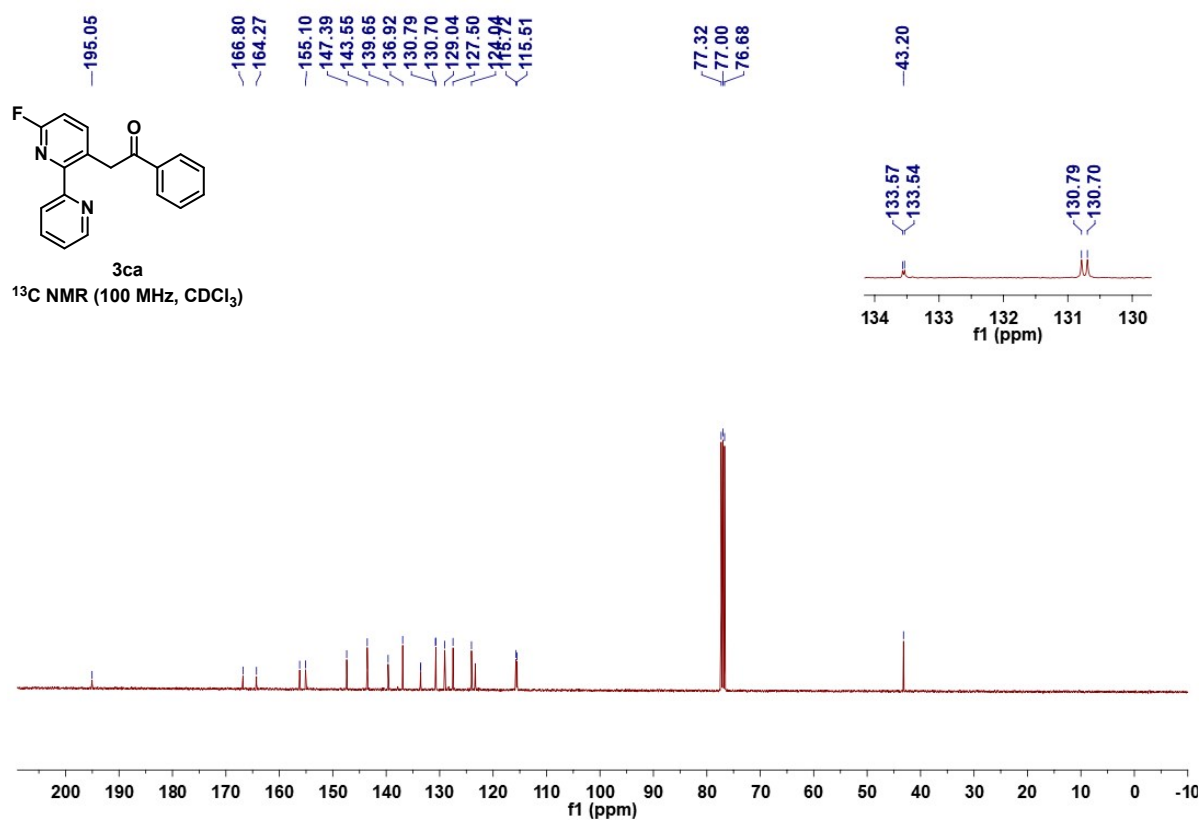

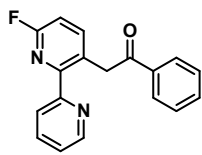

3ca

$^{19}\text{F}$  NMR (376 MHz,  $\text{CDCl}_3$ )

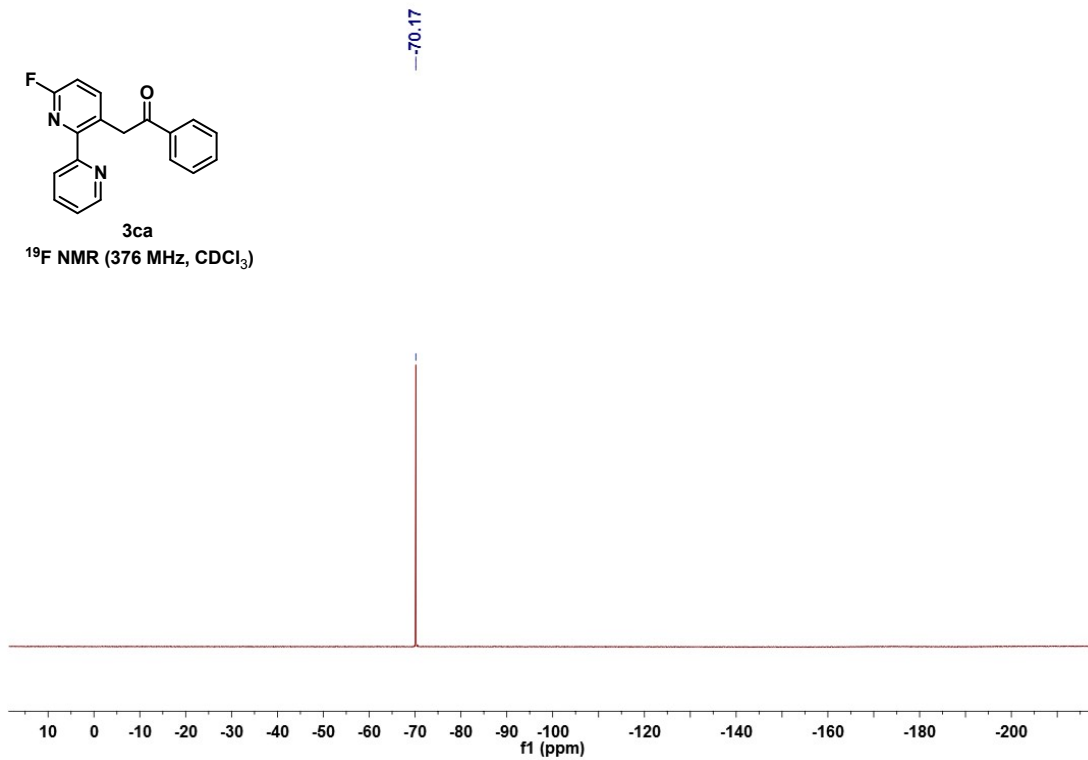



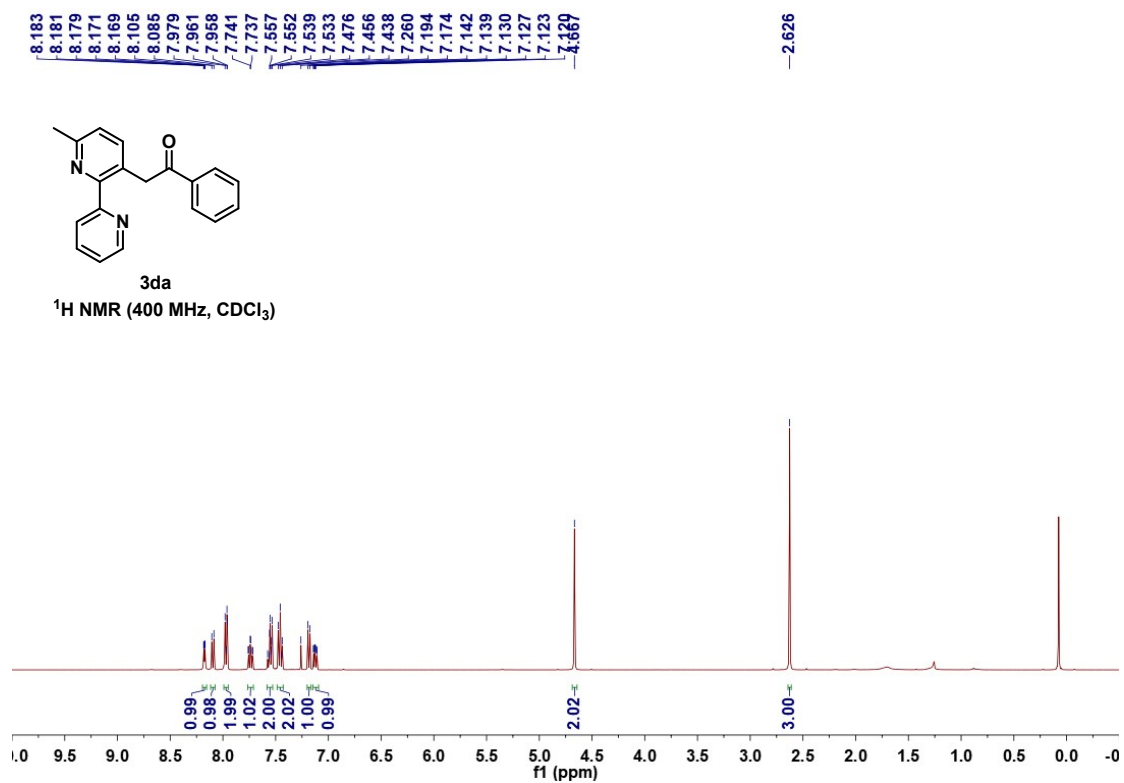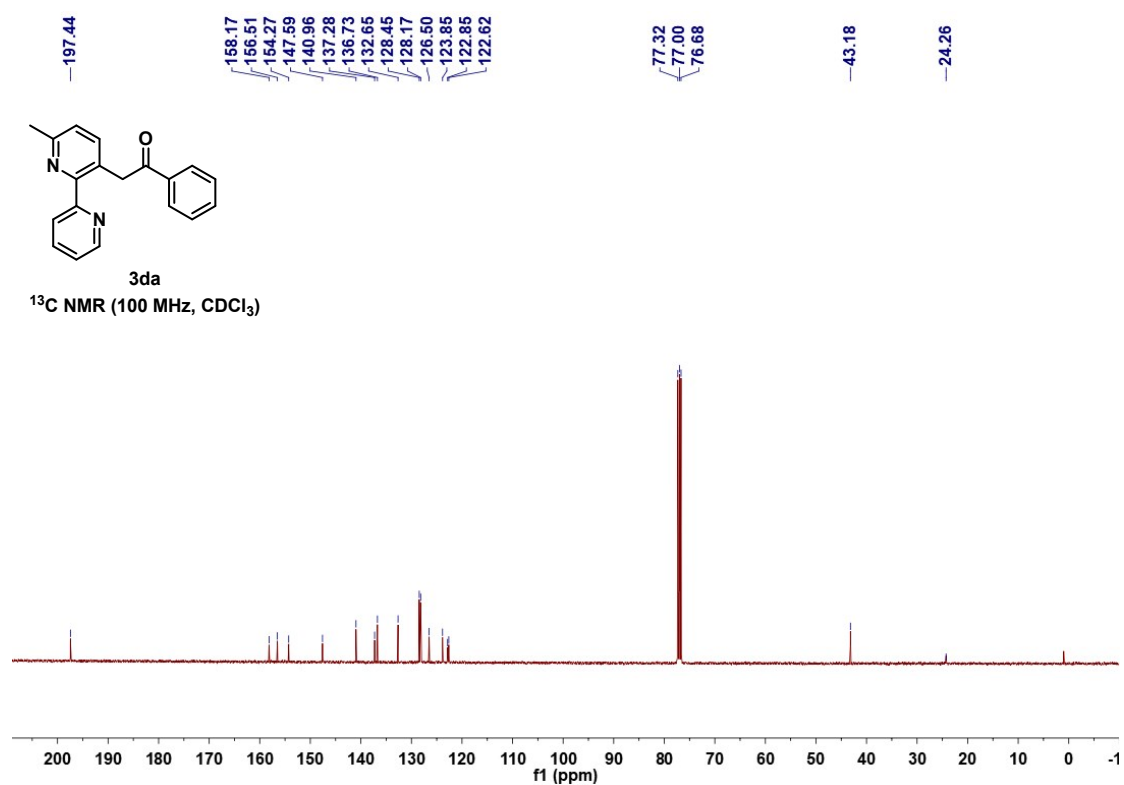

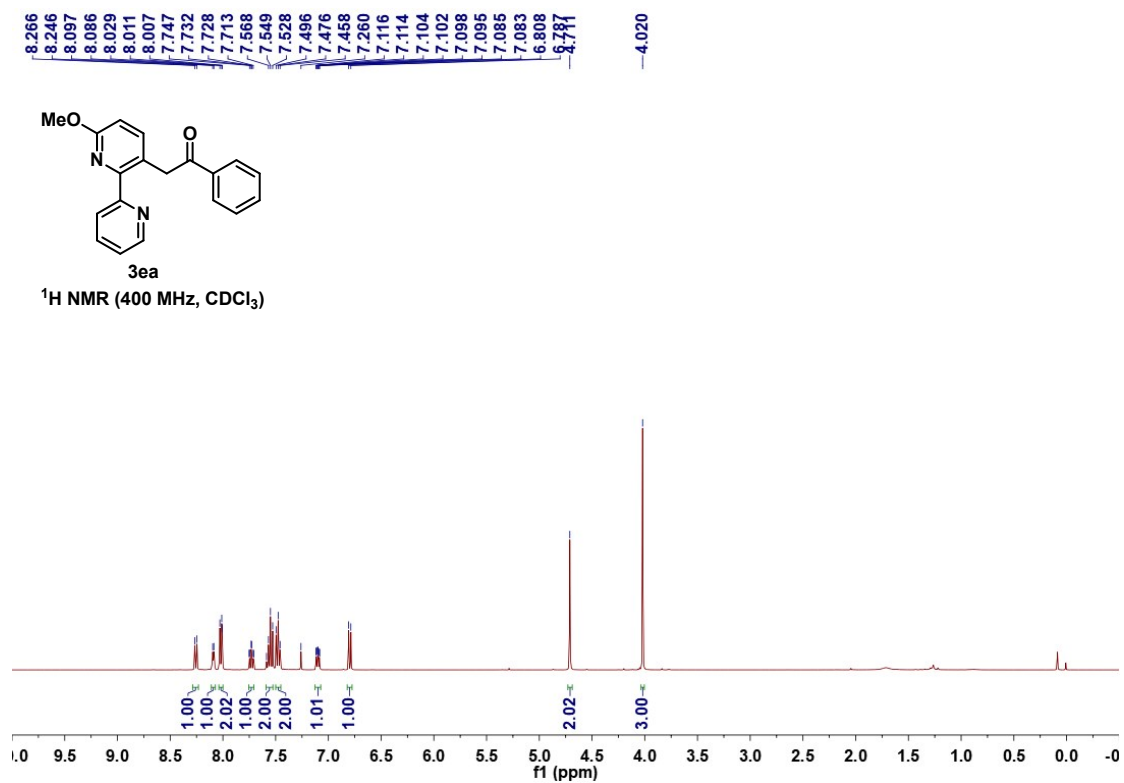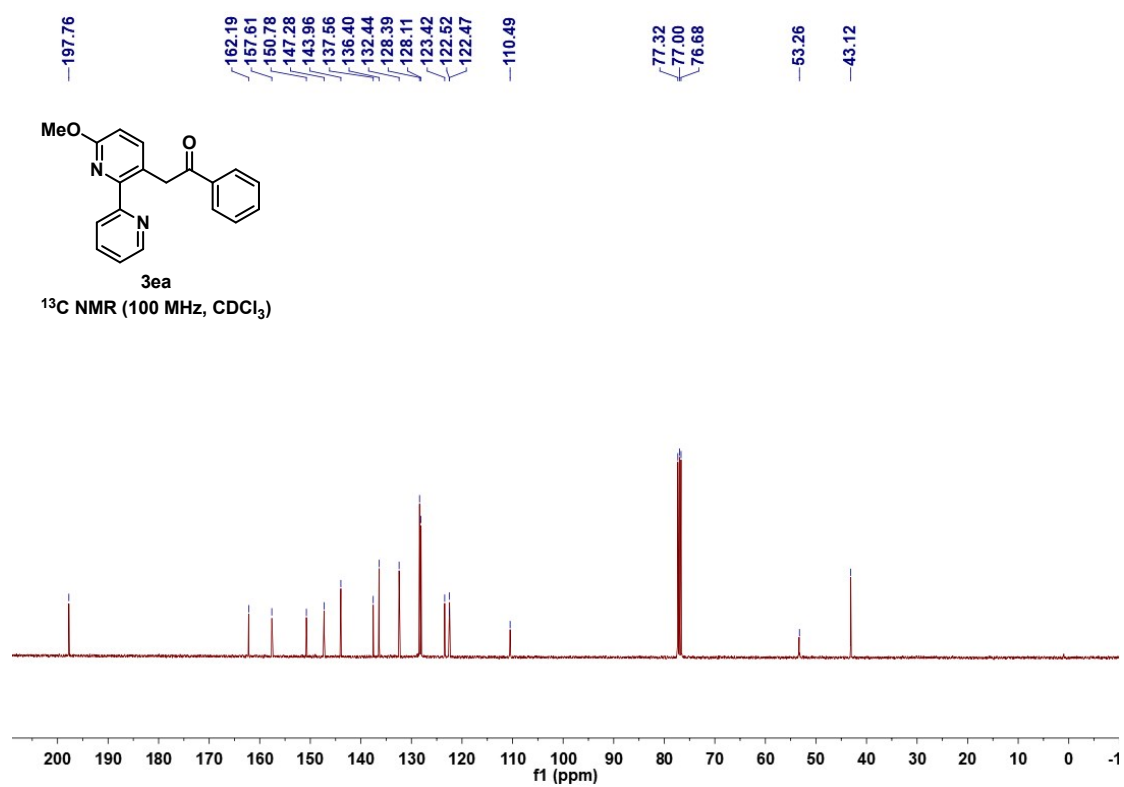

8.694  
8.688  
8.165  
8.145  
8.079  
8.077  
8.067  
8.065  
8.003  
7.985  
7.981  
7.821  
7.816  
7.751  
7.746  
7.594  
7.575  
7.513  
7.493  
7.475  
7.459

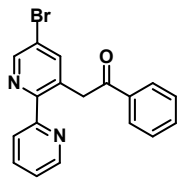

3fa  
<sup>1</sup>H NMR (400 MHz, CDCl<sub>3</sub>)

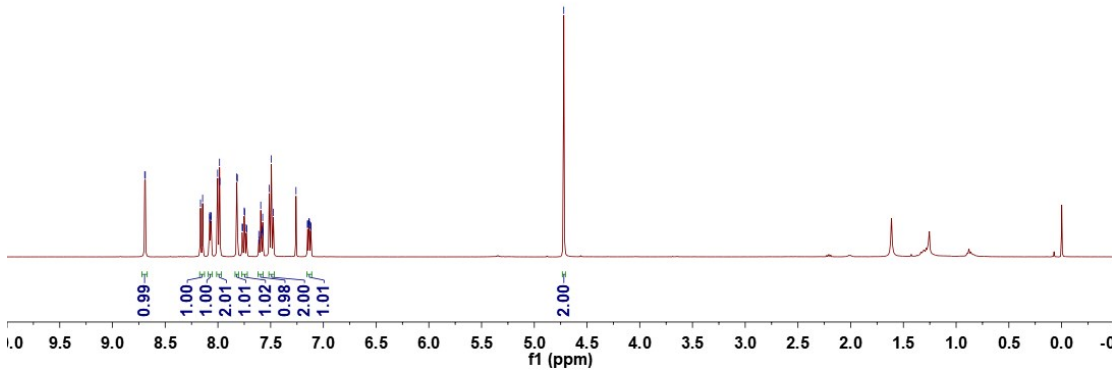

196.40  
157.00  
153.18  
148.69  
147.53  
143.24  
137.18  
136.79  
132.81  
131.76  
128.56  
128.15  
123.63  
123.04  
120.16  
77.32  
77.00  
76.68  
43.71

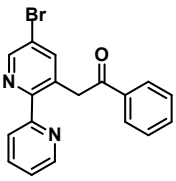

3fa  
<sup>13</sup>C NMR (100 MHz, CDCl<sub>3</sub>)

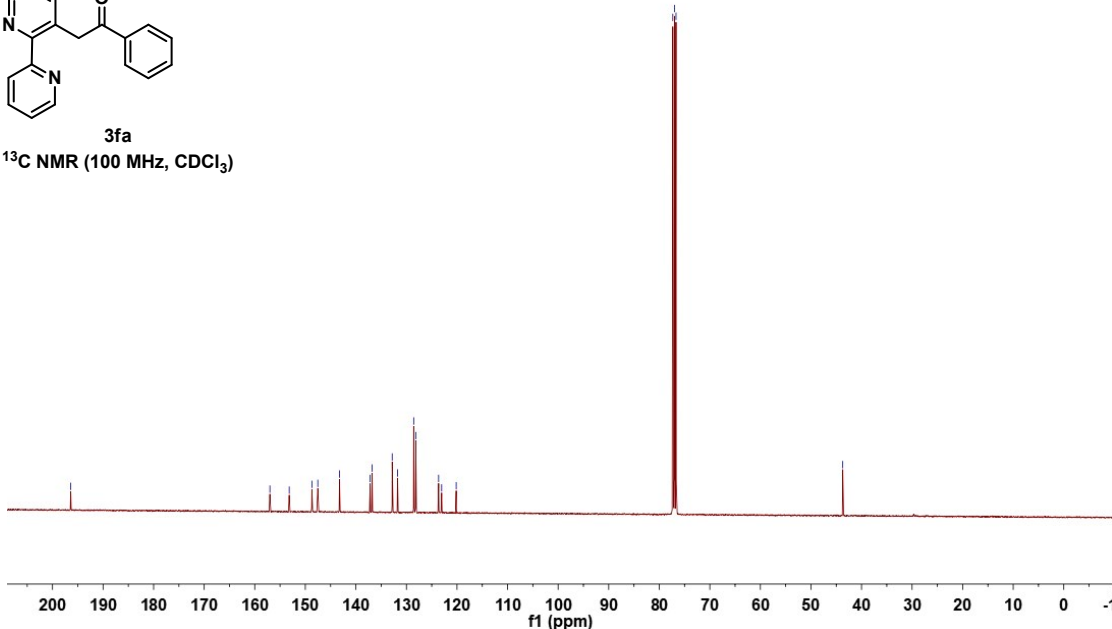

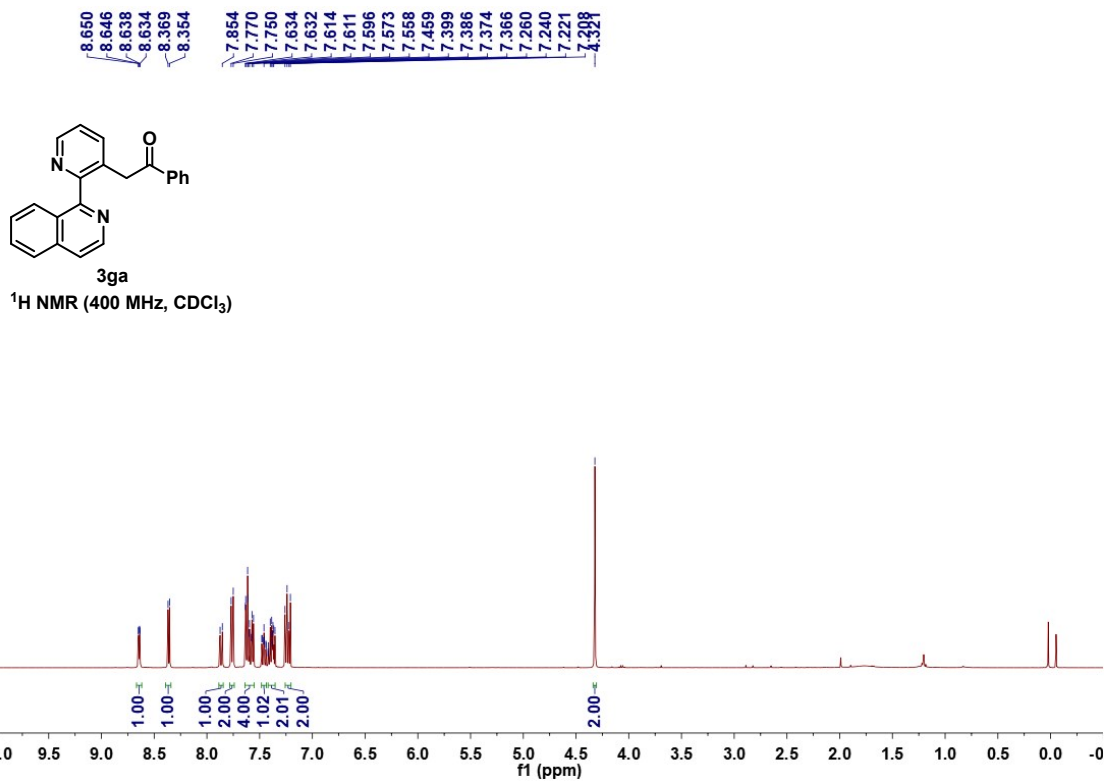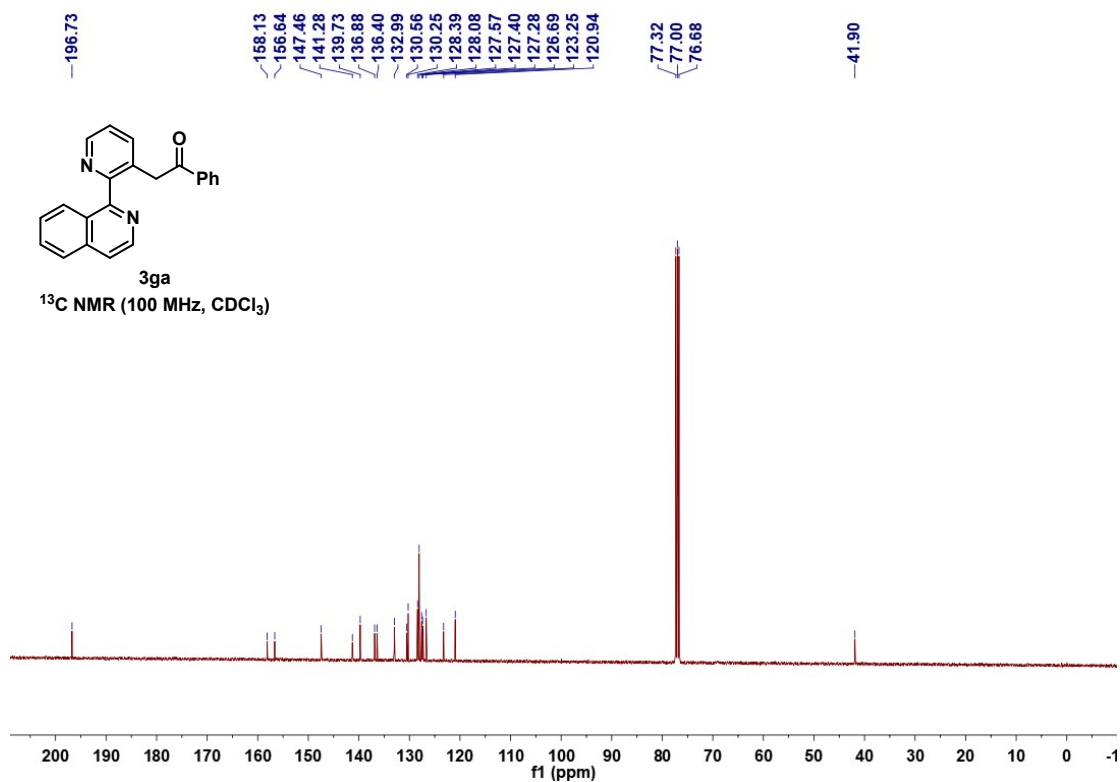

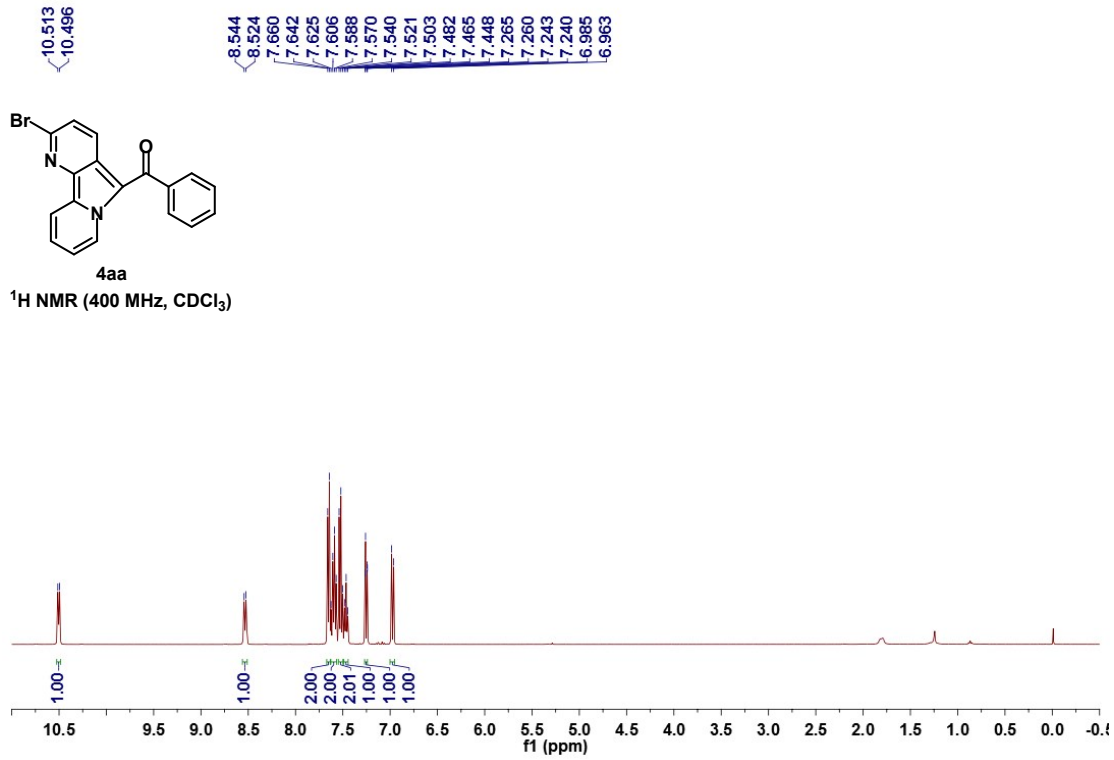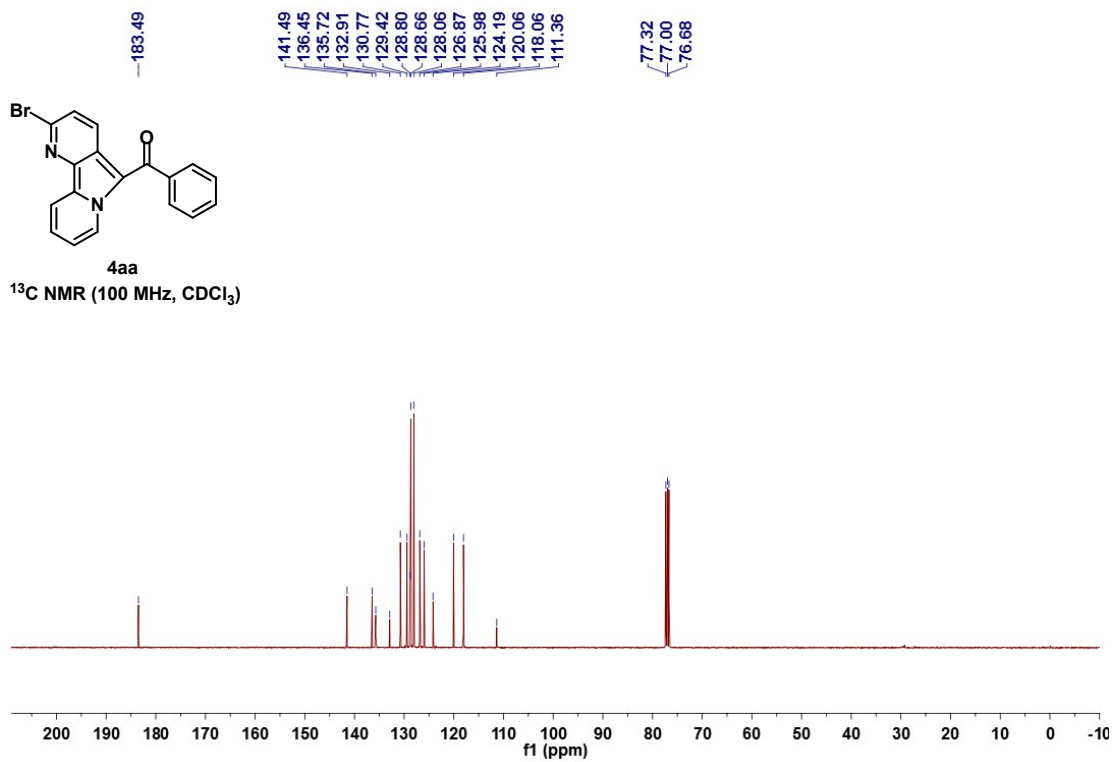

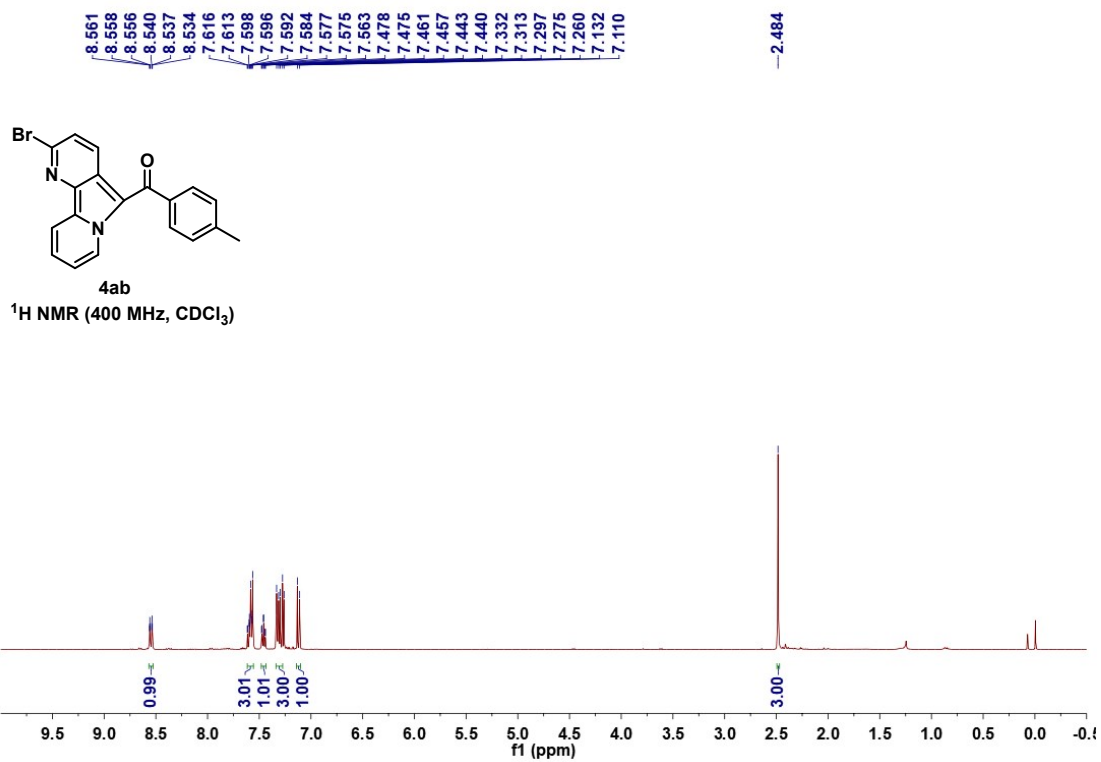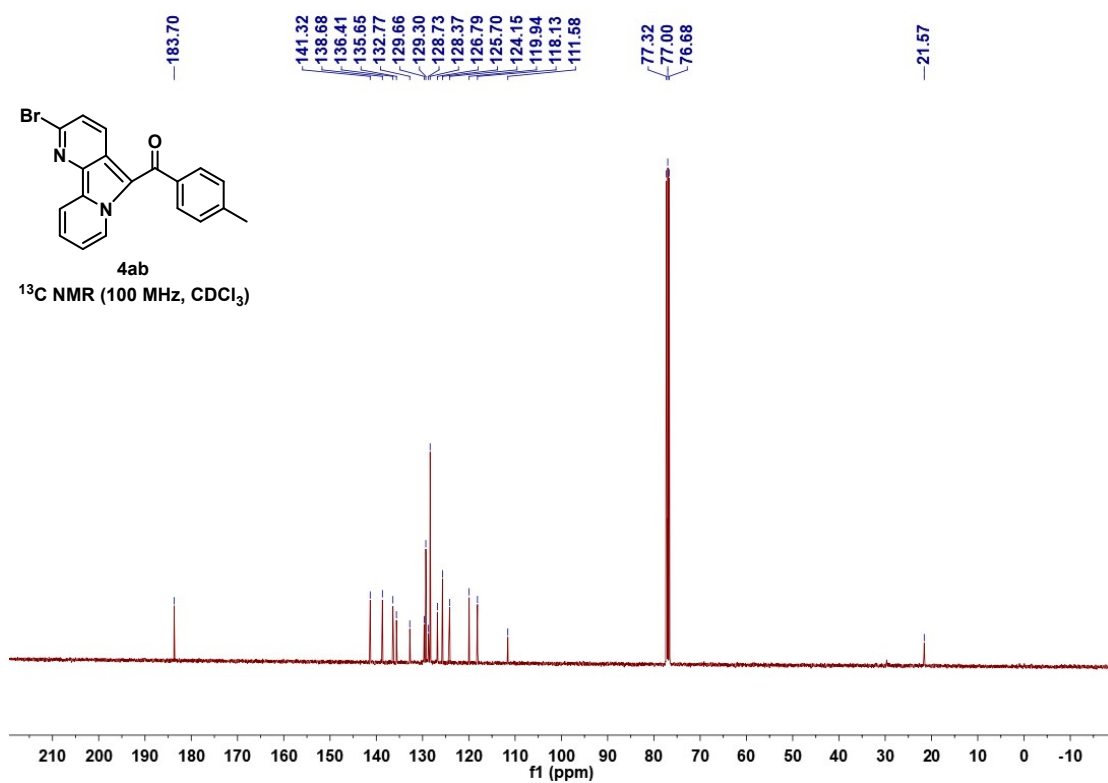

10.488  
10.471

8.557  
8.535  
7.623  
7.604  
7.591  
7.570  
7.542  
7.522  
7.469  
7.452  
7.435  
7.309  
7.287  
7.260  
7.131  
7.109

1.401

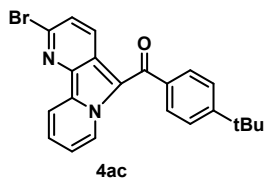

<sup>1</sup>H NMR (400 MHz, CDCl<sub>3</sub>)

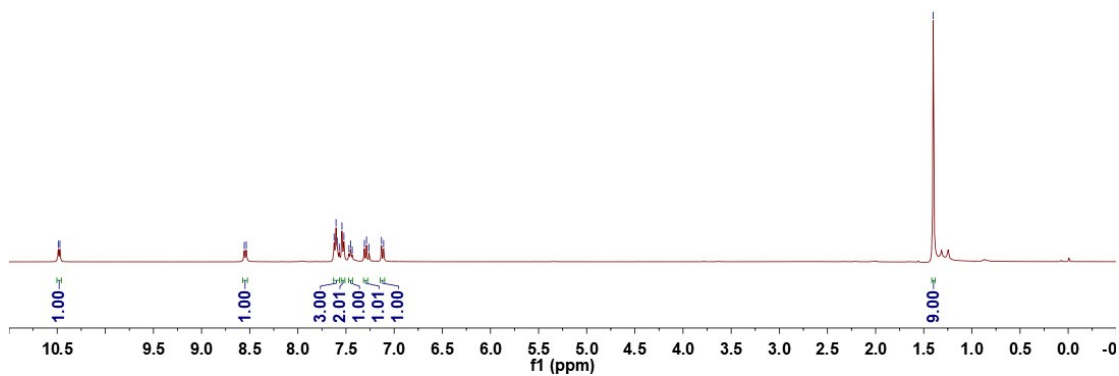

183.67

154.50  
138.58  
136.39  
135.82  
132.74  
129.64  
128.72  
128.16  
126.81  
125.68  
125.53  
124.11  
119.92  
118.09  
111.58

77.32  
77.00  
76.68

34.99  
31.24

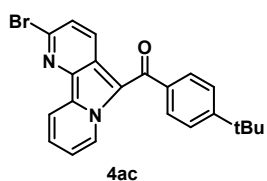

<sup>13</sup>C NMR (100 MHz, CDCl<sub>3</sub>)

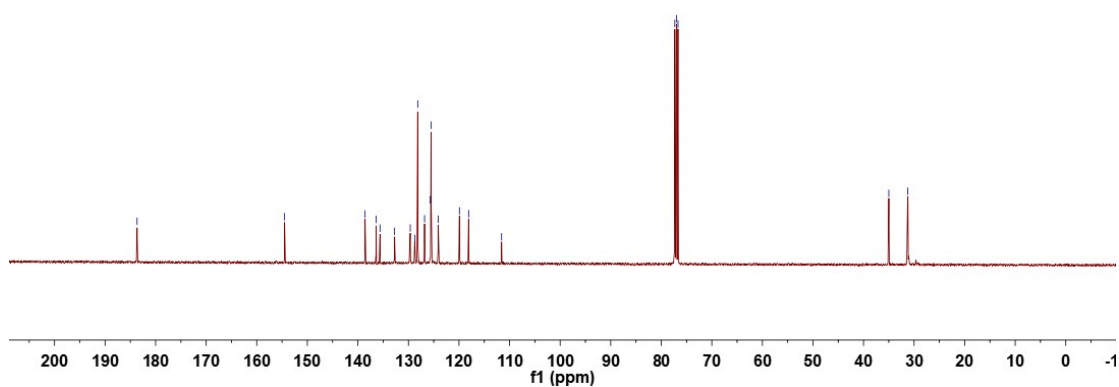

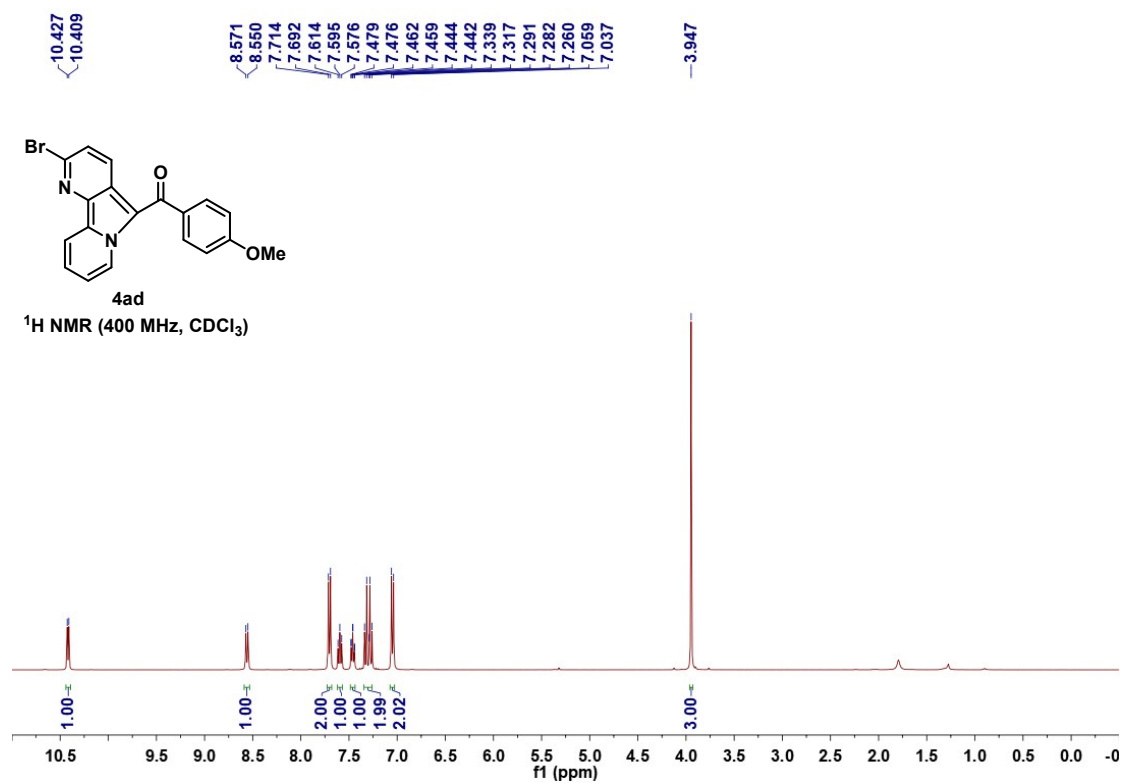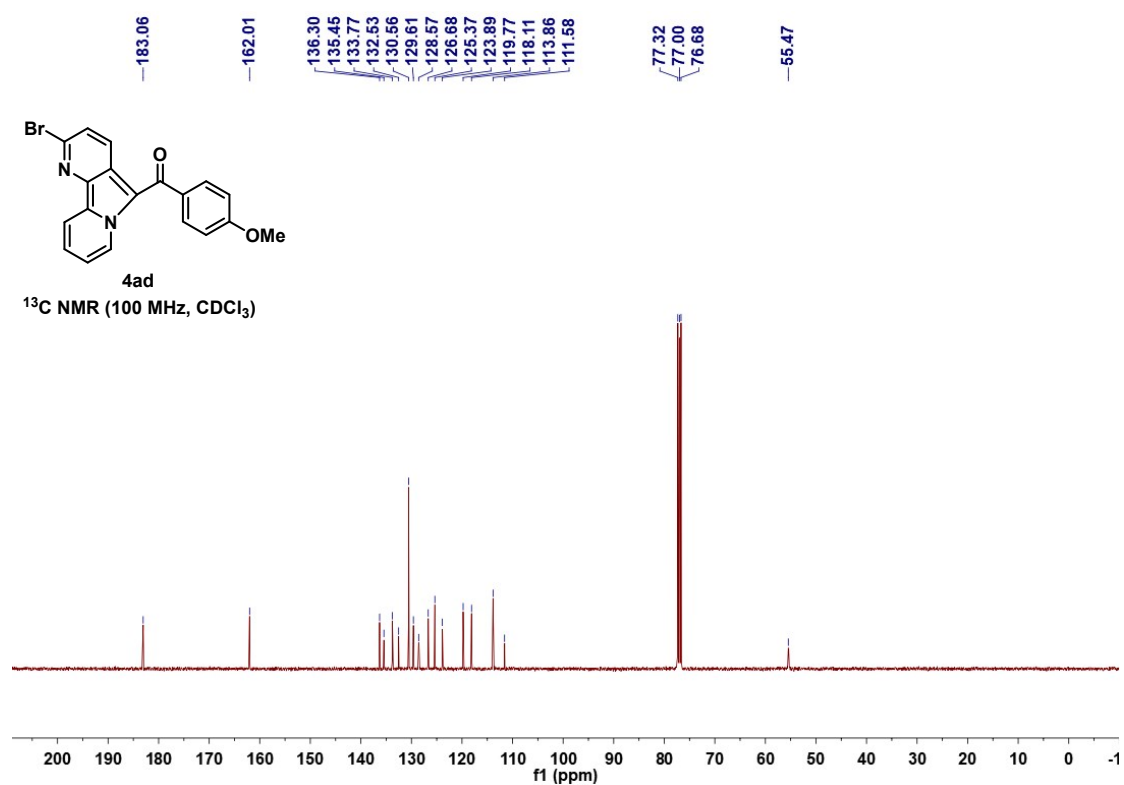



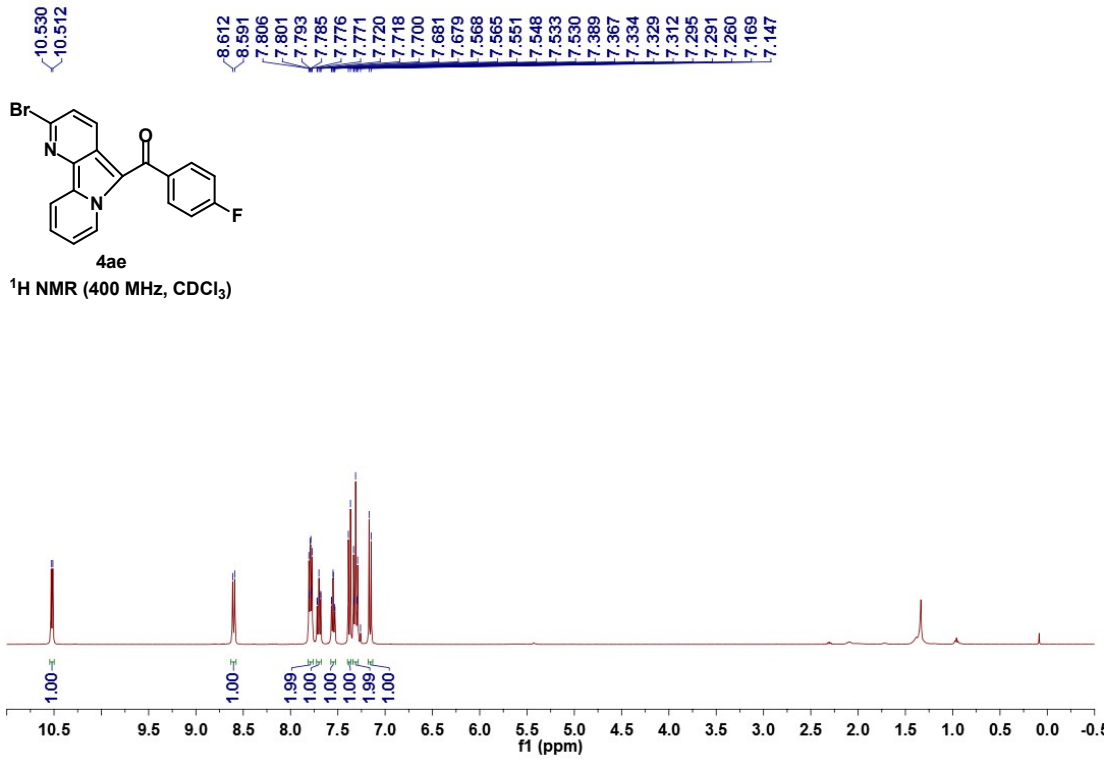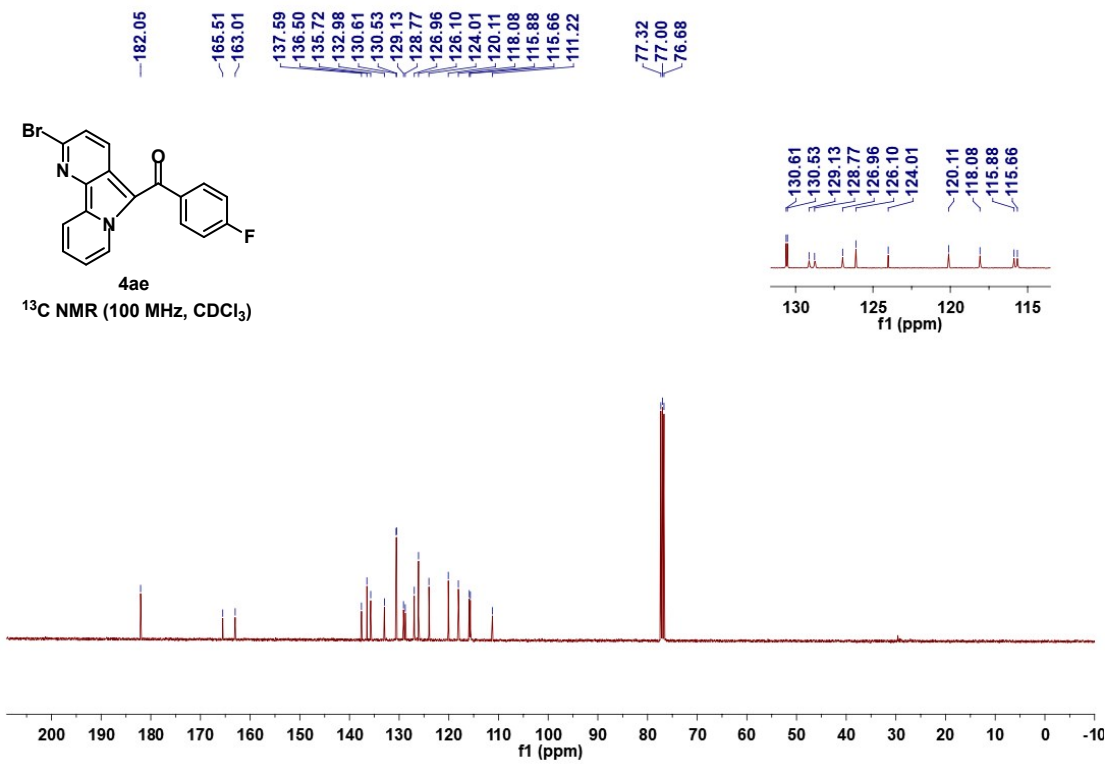

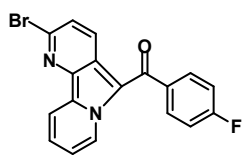

4ae

$^{19}\text{F}$  NMR (376 MHz,  $\text{CDCl}_3$ )

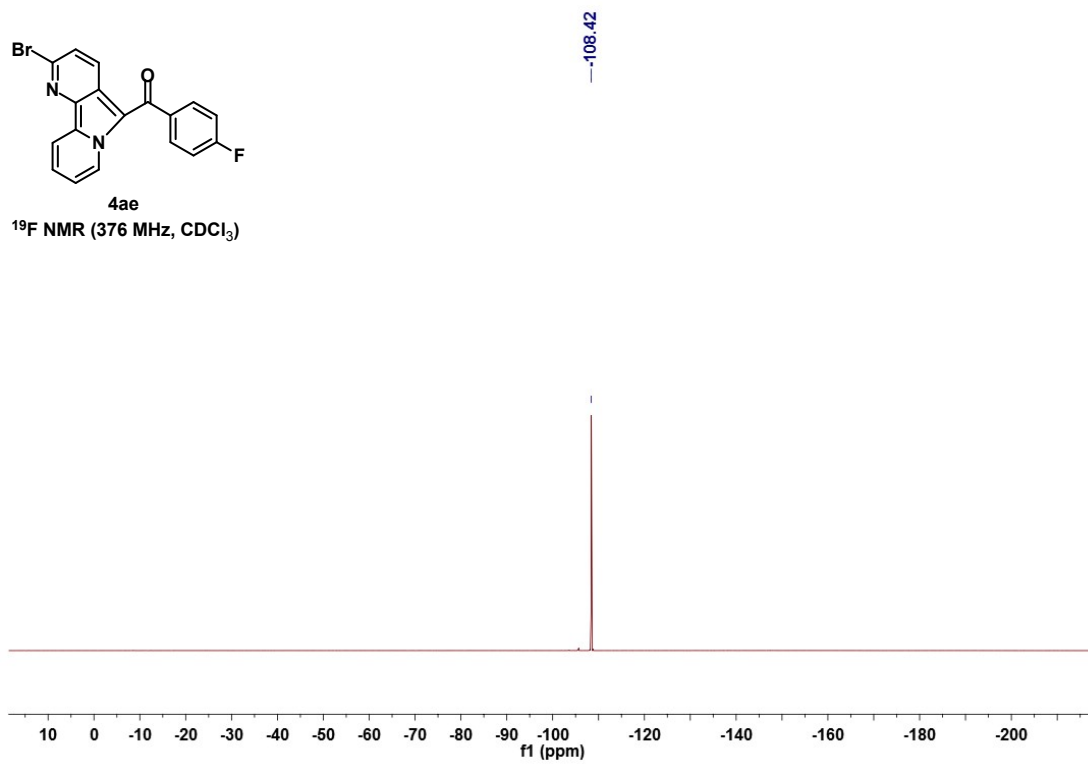

10.540  
10.538  
10.536  
10.523  
10.521  
10.518  
8.568  
8.564  
8.562  
8.546  
8.544  
8.540  
7.818  
7.797  
7.782  
7.761  
7.690  
7.687  
7.672  
7.669  
7.666  
7.651  
7.648  
7.529  
7.526  
7.512  
7.508  
7.494  
7.491  
7.312  
7.290  
7.260  
6.931  
6.908

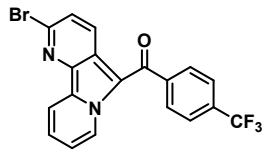

4ag

<sup>1</sup>H NMR (400 MHz, CDCl<sub>3</sub>)

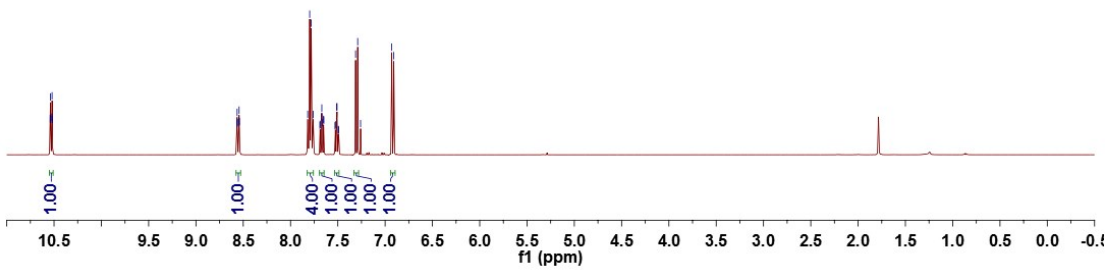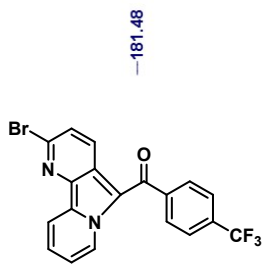

4ag

<sup>13</sup>C NMR (100 MHz, CDCl<sub>3</sub>)

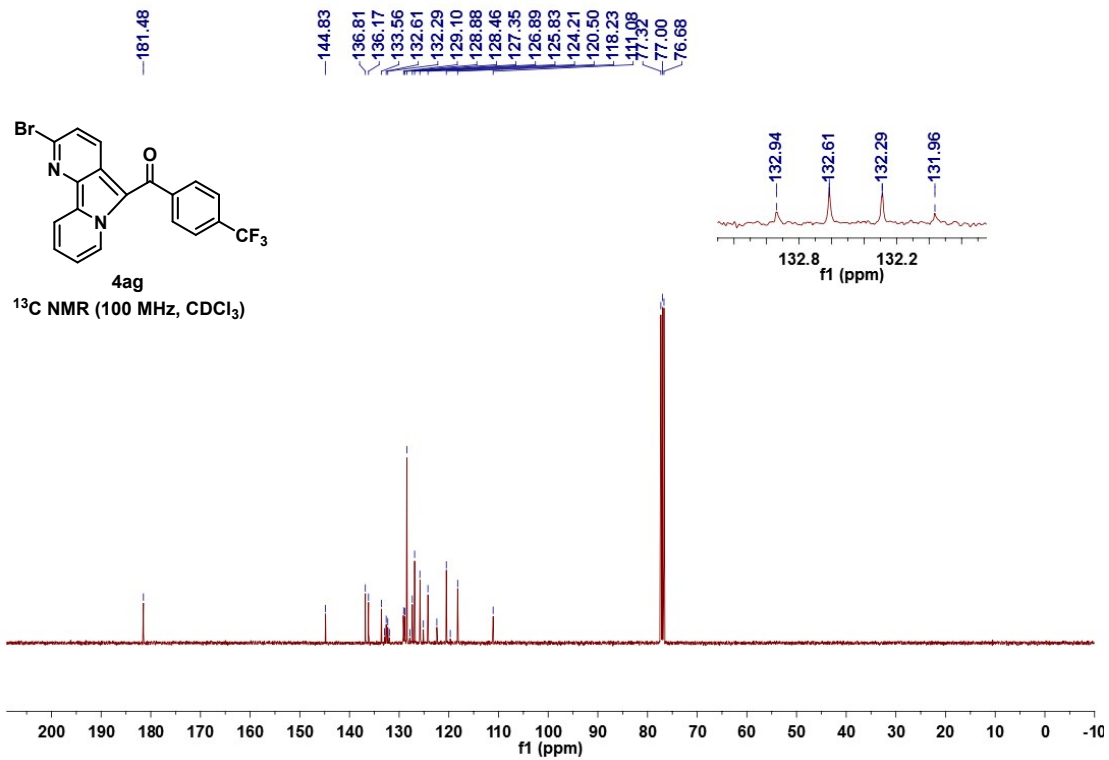

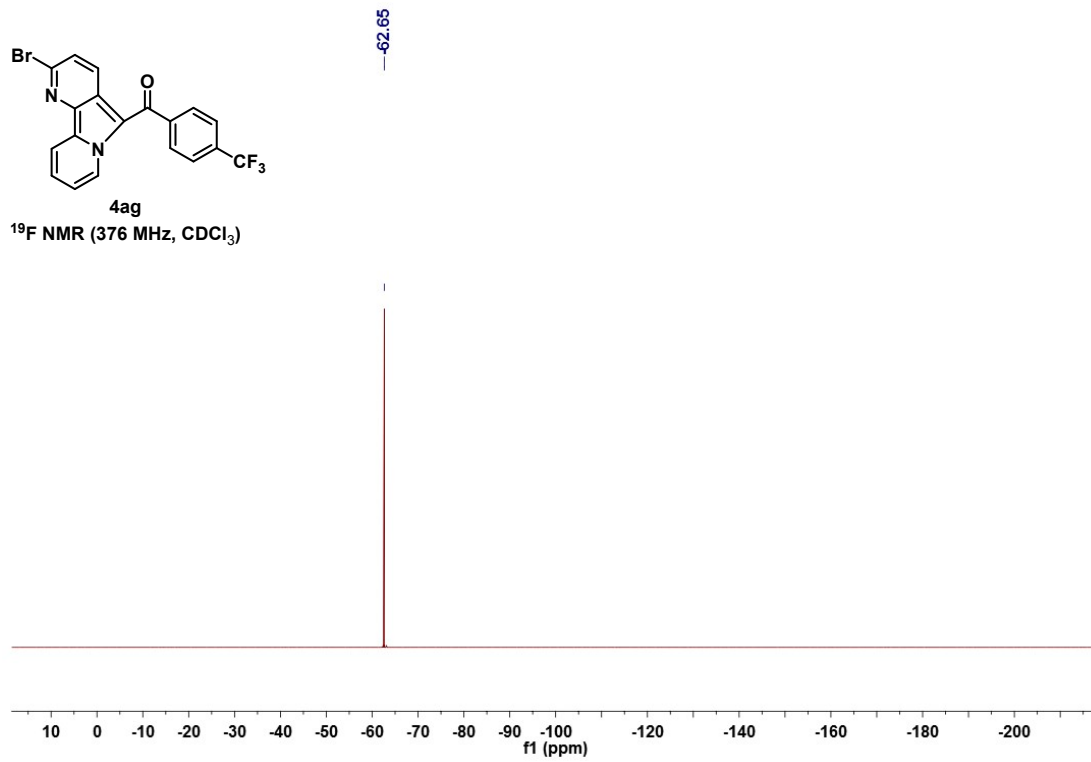

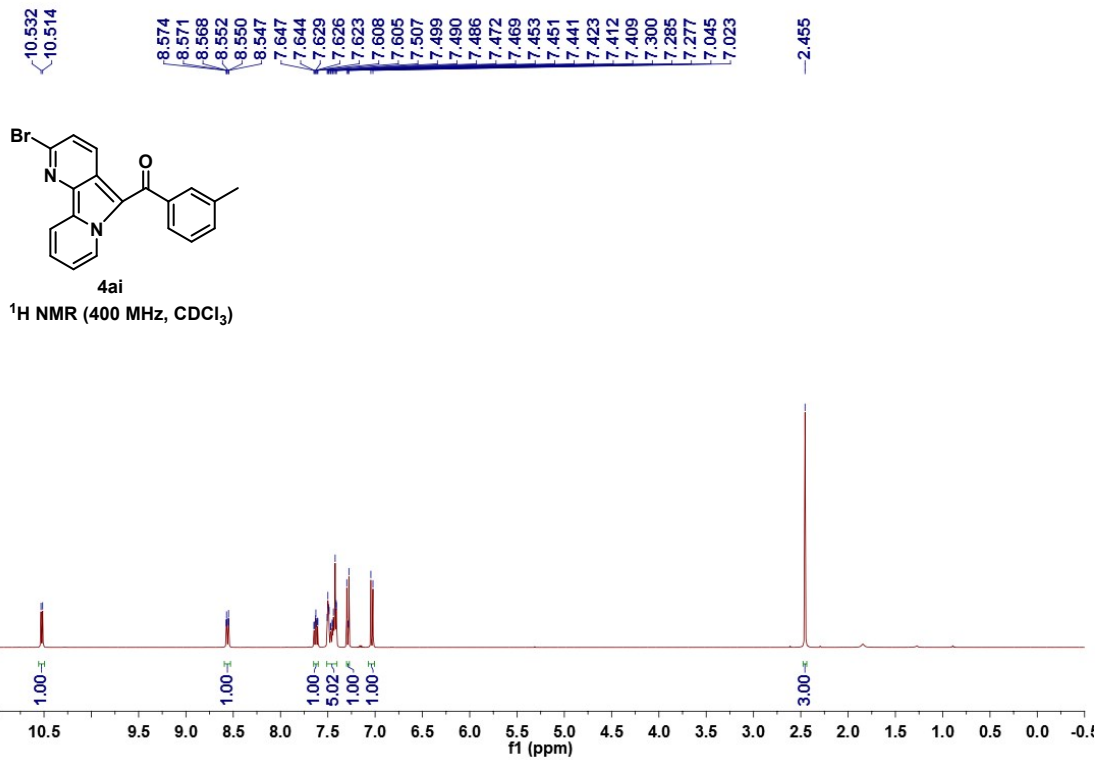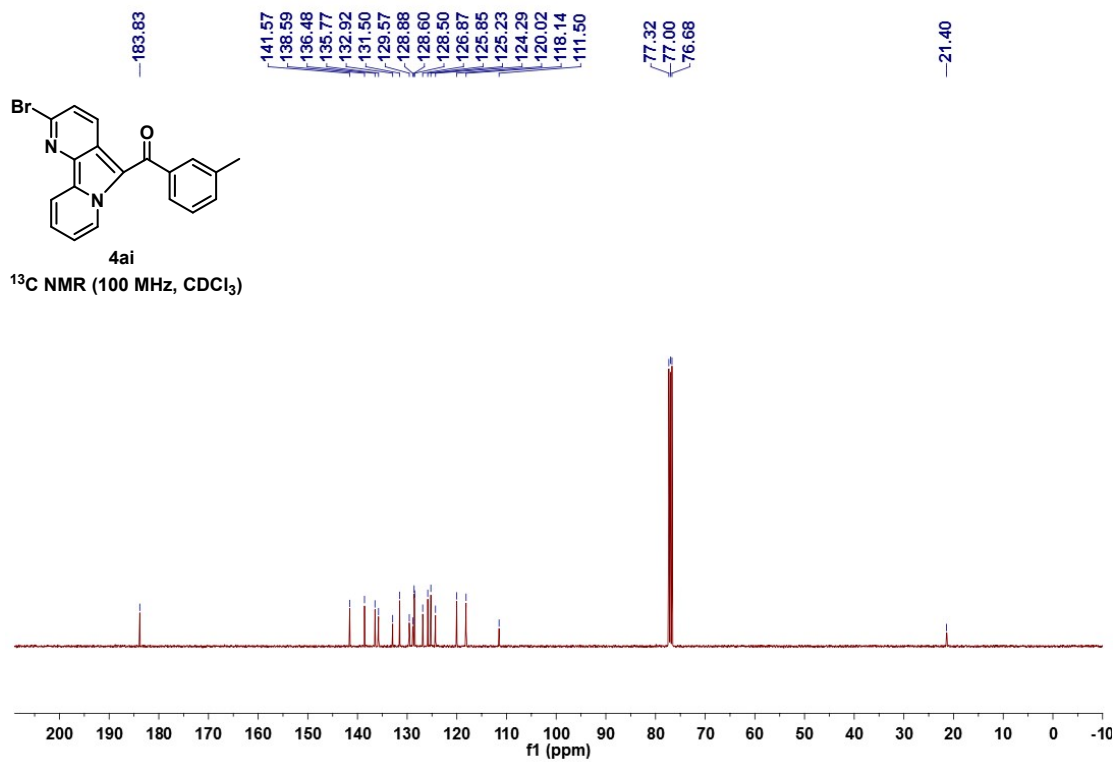

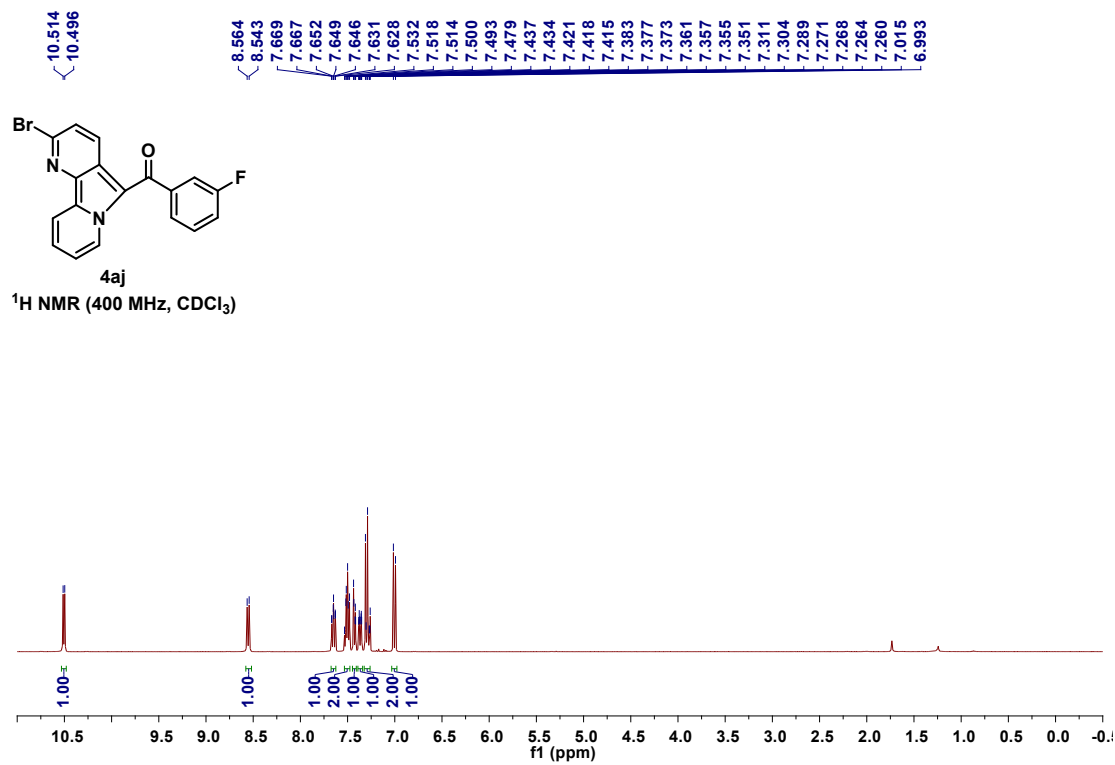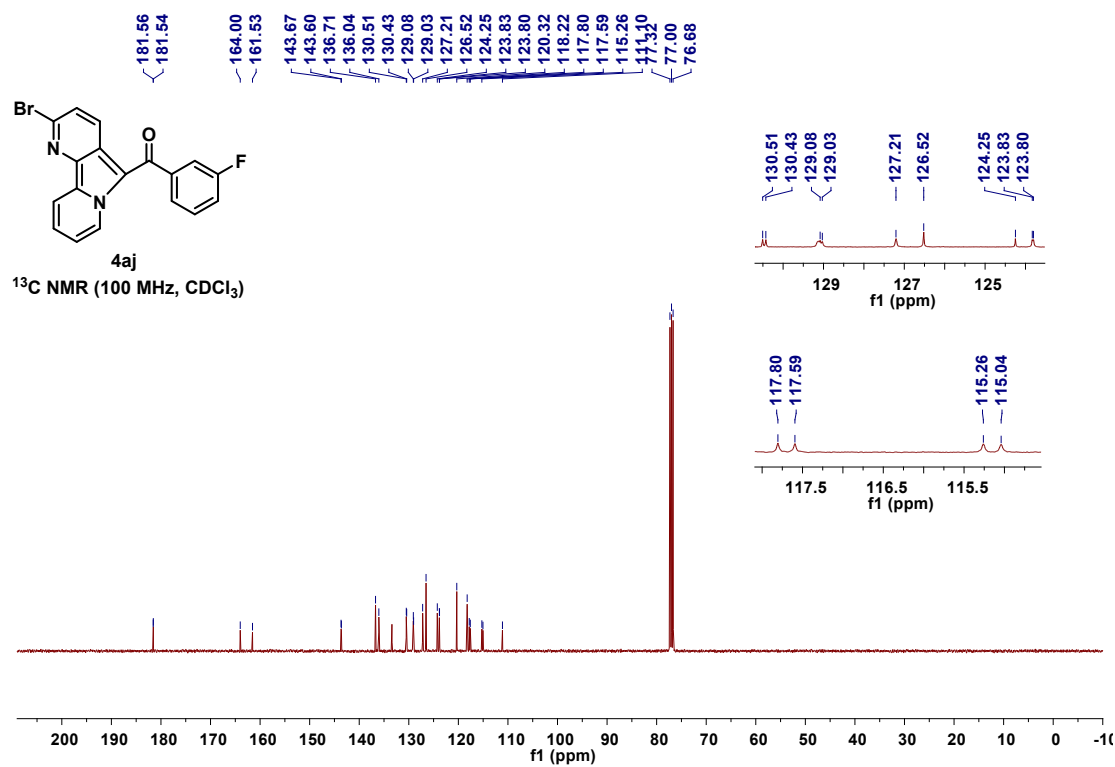

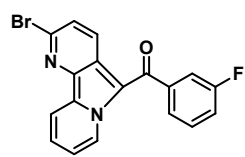

4aj  
<sup>19</sup>F NMR (376 MHz, CDCl<sub>3</sub>)

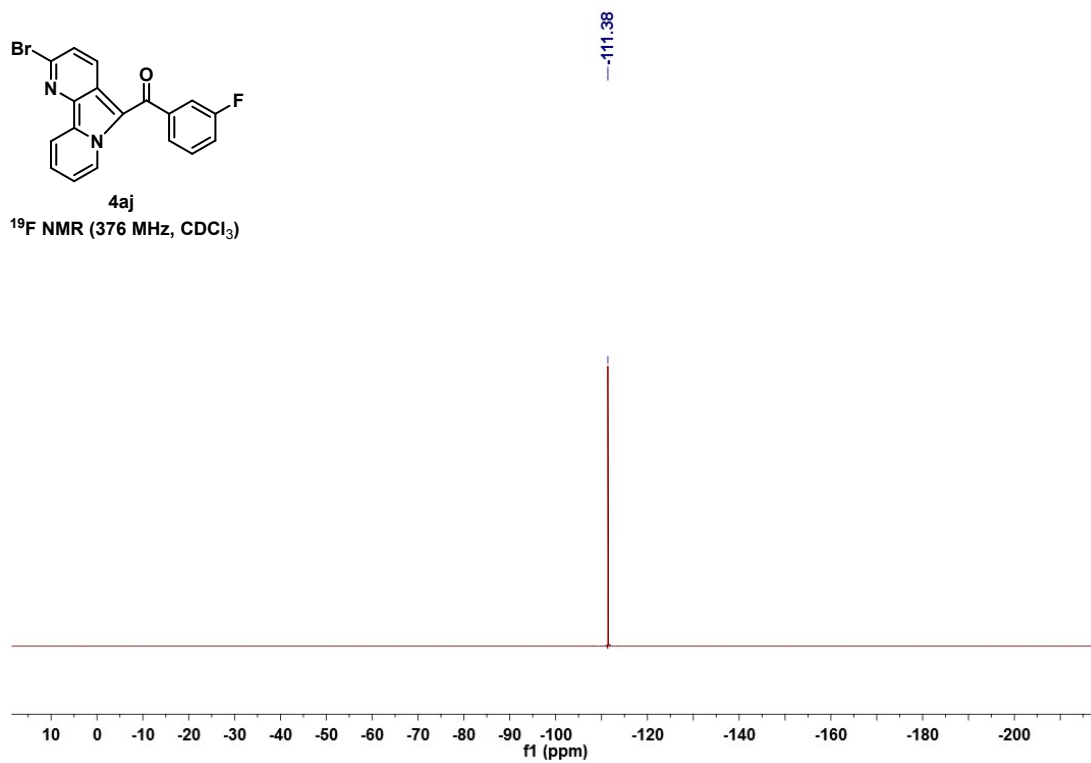

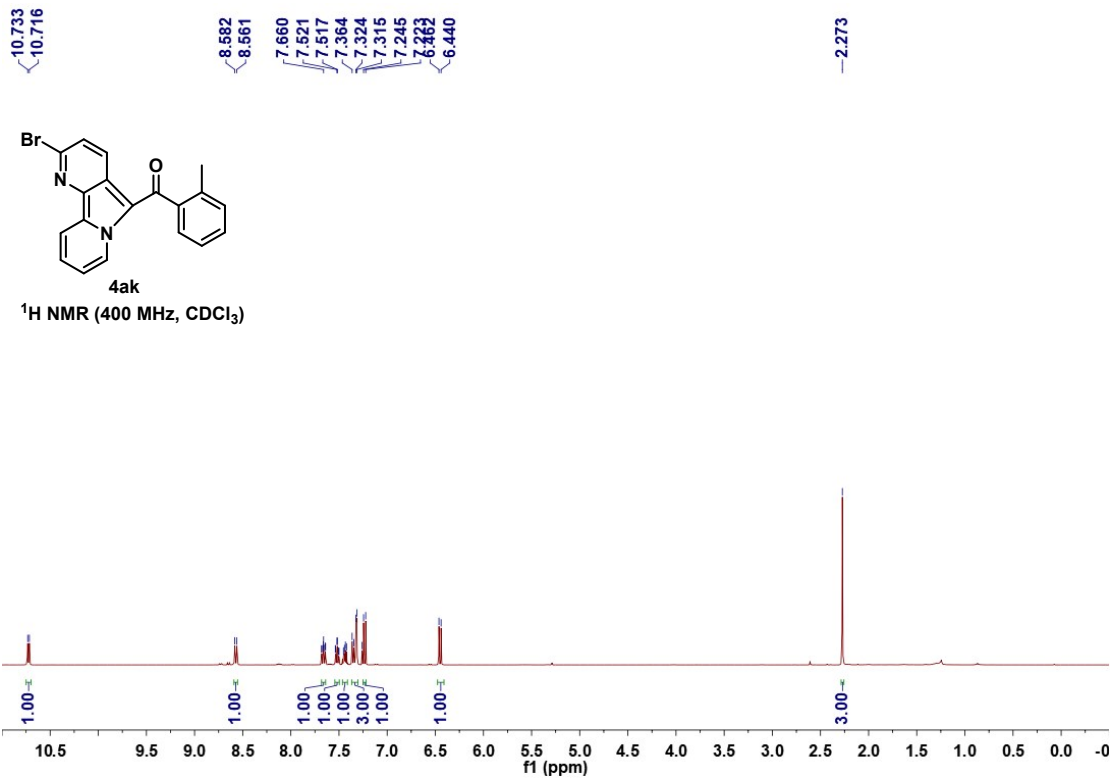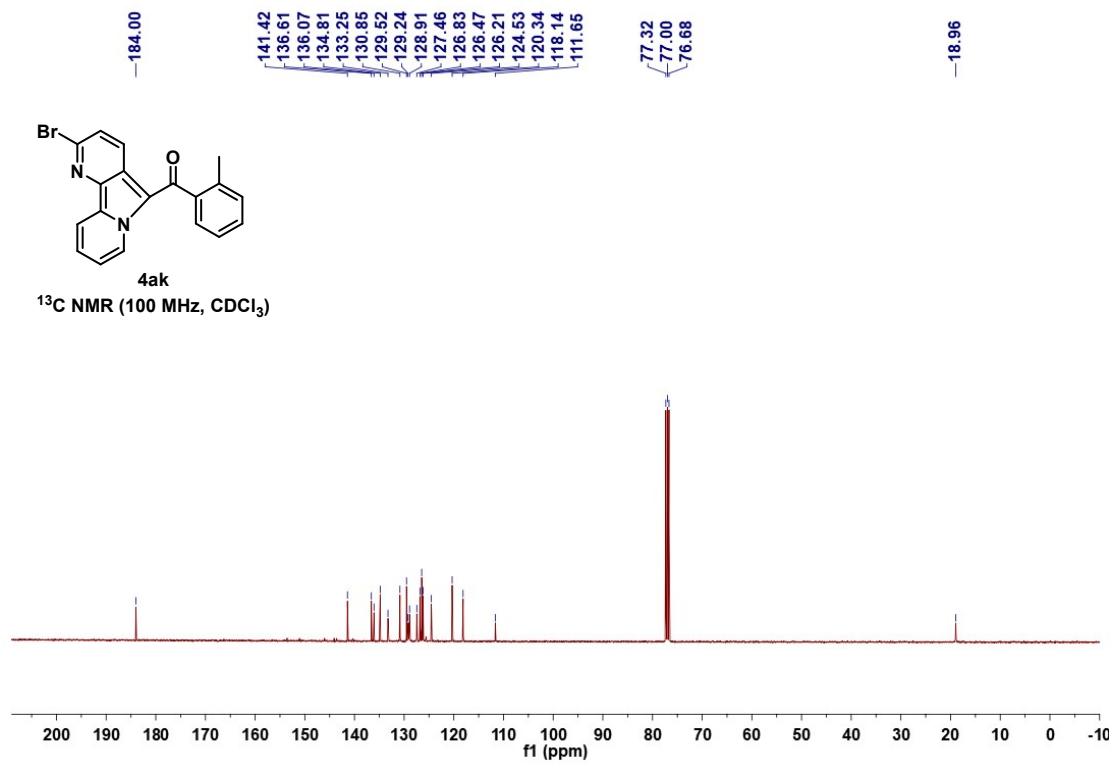



10.712  
10.695  
8.615  
8.594  
7.737  
7.718  
7.699  
7.609  
7.605  
7.587  
7.584  
7.576  
7.570  
7.566  
7.558  
7.554  
7.541  
7.537  
7.388  
7.370  
7.353  
7.332  
7.305  
7.282  
7.260  
6.858  
6.836

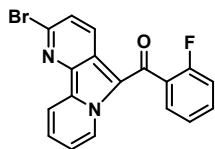

4al

<sup>1</sup>H NMR (400 MHz, CDCl<sub>3</sub>)

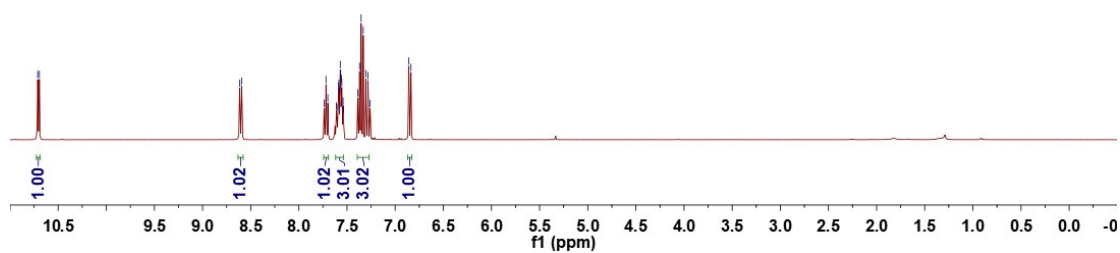

177.58  
160.33  
157.86  
136.79  
136.41  
133.62  
131.86  
131.78  
129.93  
129.76  
129.46  
129.43  
128.55  
127.58  
126.95  
124.81  
124.42  
120.54  
118.21  
116.55  
116.34  
116.33  
77.00  
76.68

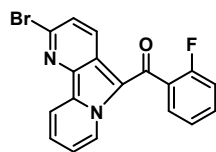

4al

<sup>13</sup>C NMR (100 MHz, CDCl<sub>3</sub>)

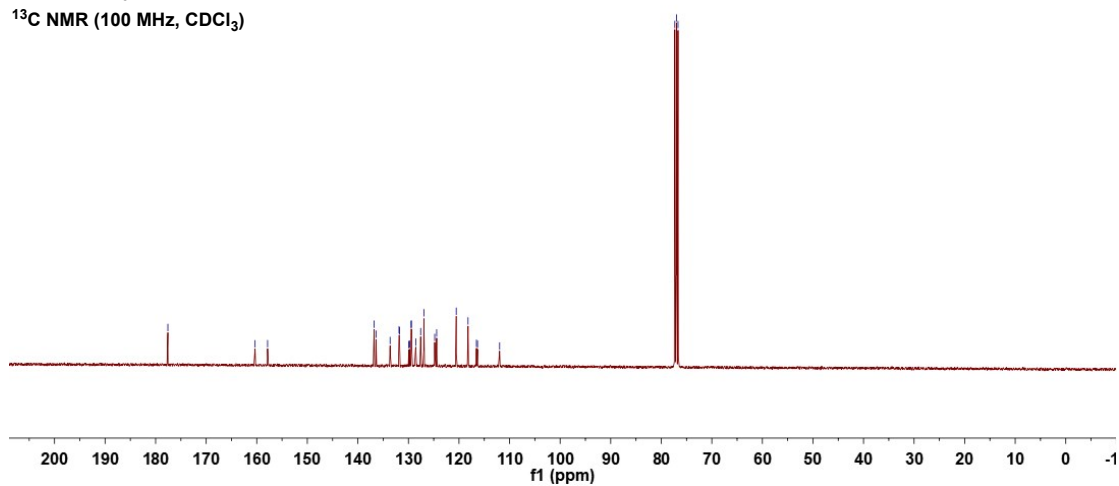

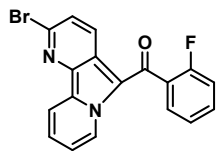

4al

$^{19}\text{F}$  NMR (376 MHz,  $\text{CDCl}_3$ )

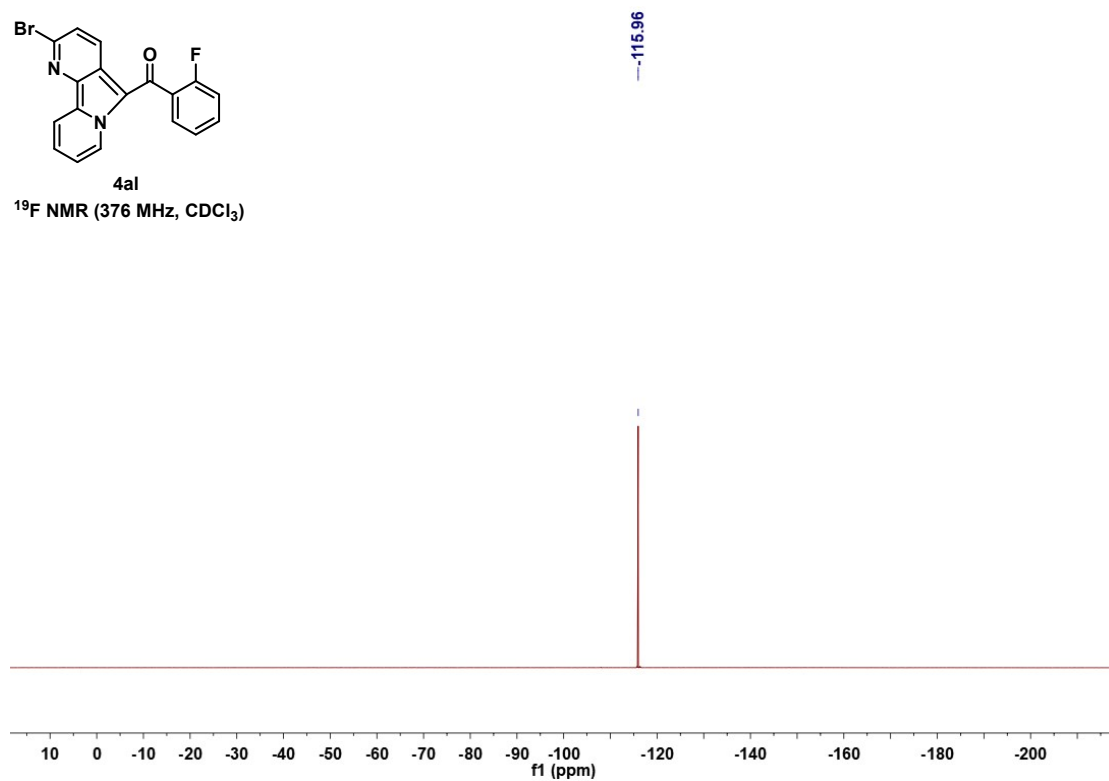

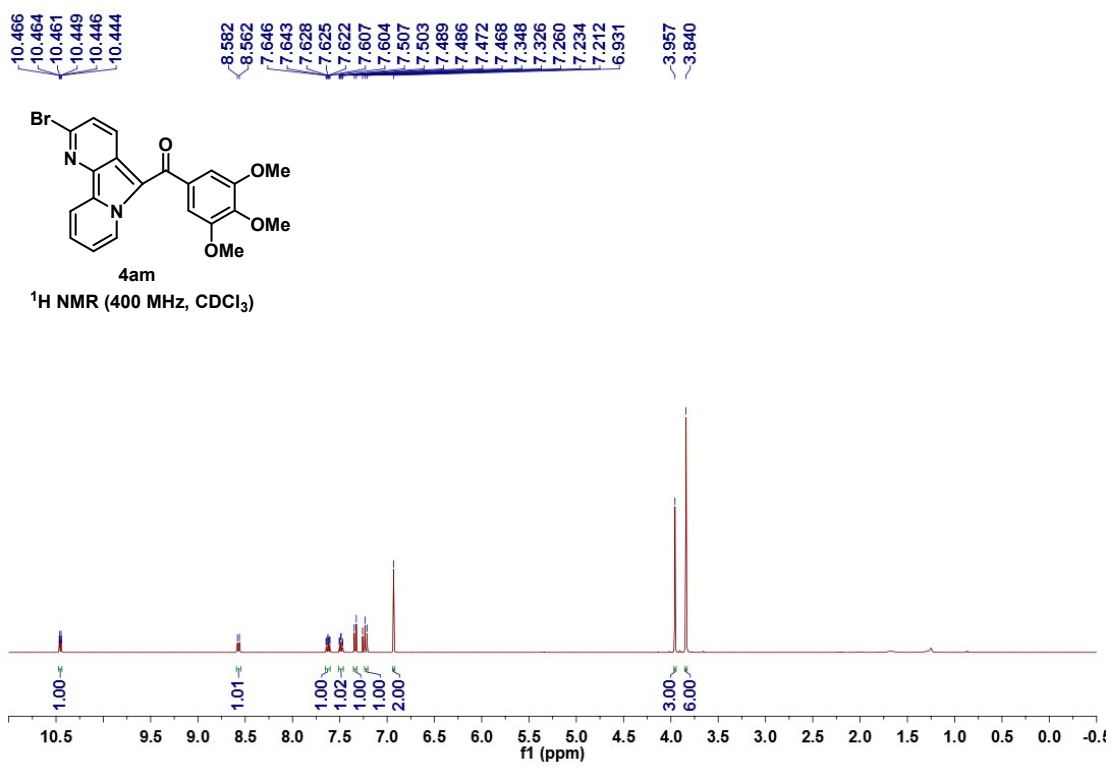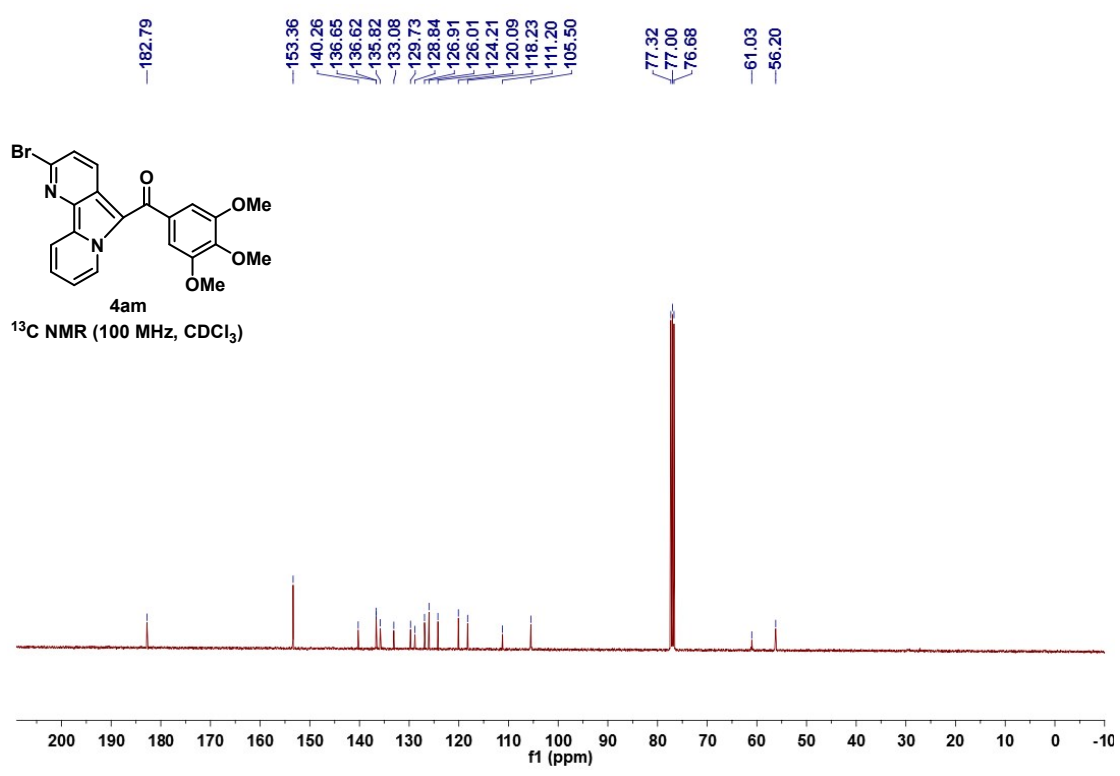

10.821  
10.803

8.563  
8.549  
8.528

7.955  
7.934  
7.585  
7.575  
7.571  
7.031  
6.999  
6.268  
6.262  
6.242  
6.240

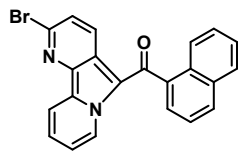

<sup>1</sup>H NMR (400 MHz, CDCl<sub>3</sub>)

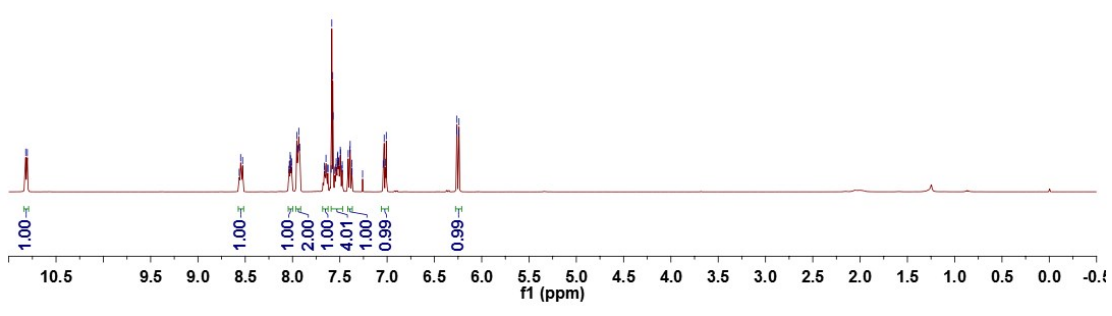

182.95

139.12  
136.51  
136.07  
133.61  
133.32  
130.17  
129.79  
129.26  
129.02  
128.21  
127.15  
126.94  
126.63  
126.42  
125.21  
125.11  
125.09  
124.30  
120.38  
118.04  
112.22

77.32  
77.00  
76.68

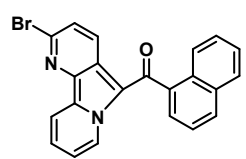

<sup>13</sup>C NMR (100 MHz, CDCl<sub>3</sub>)

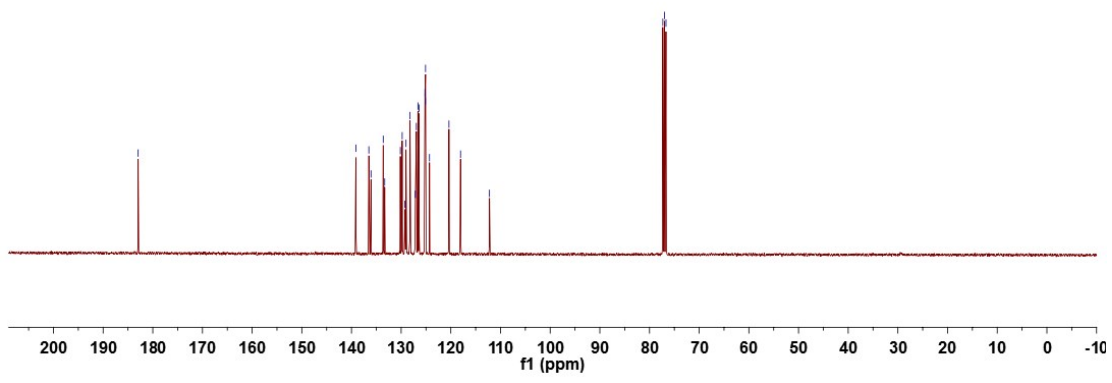

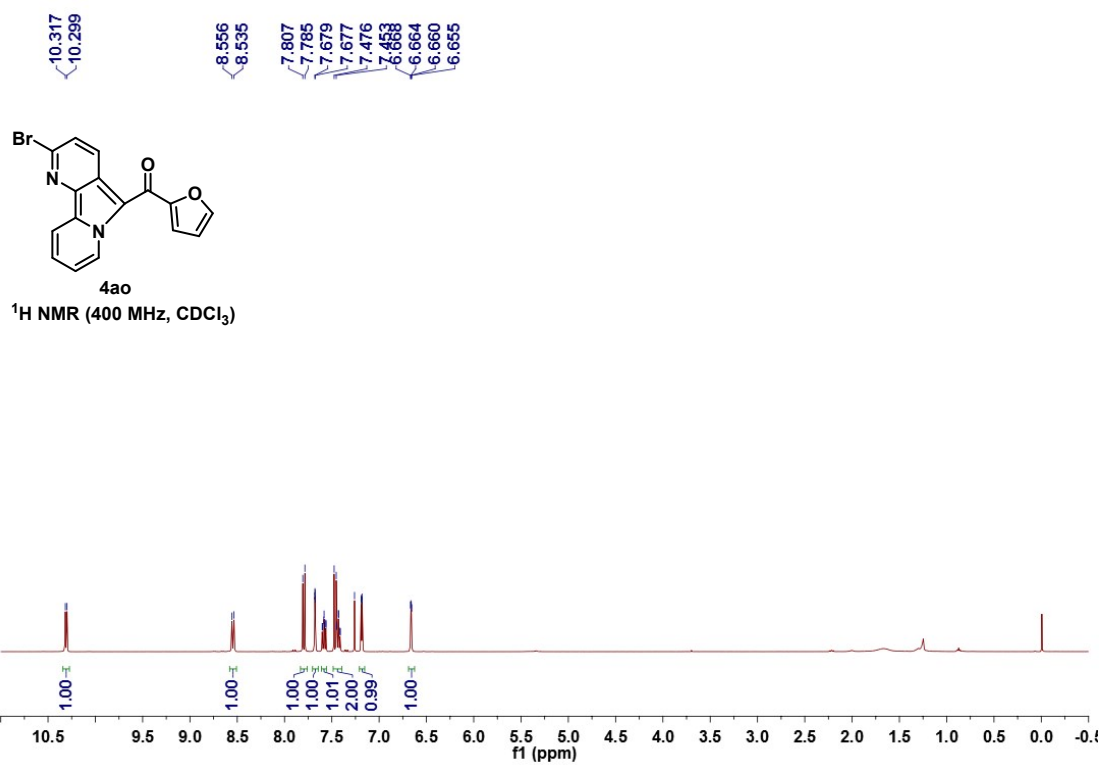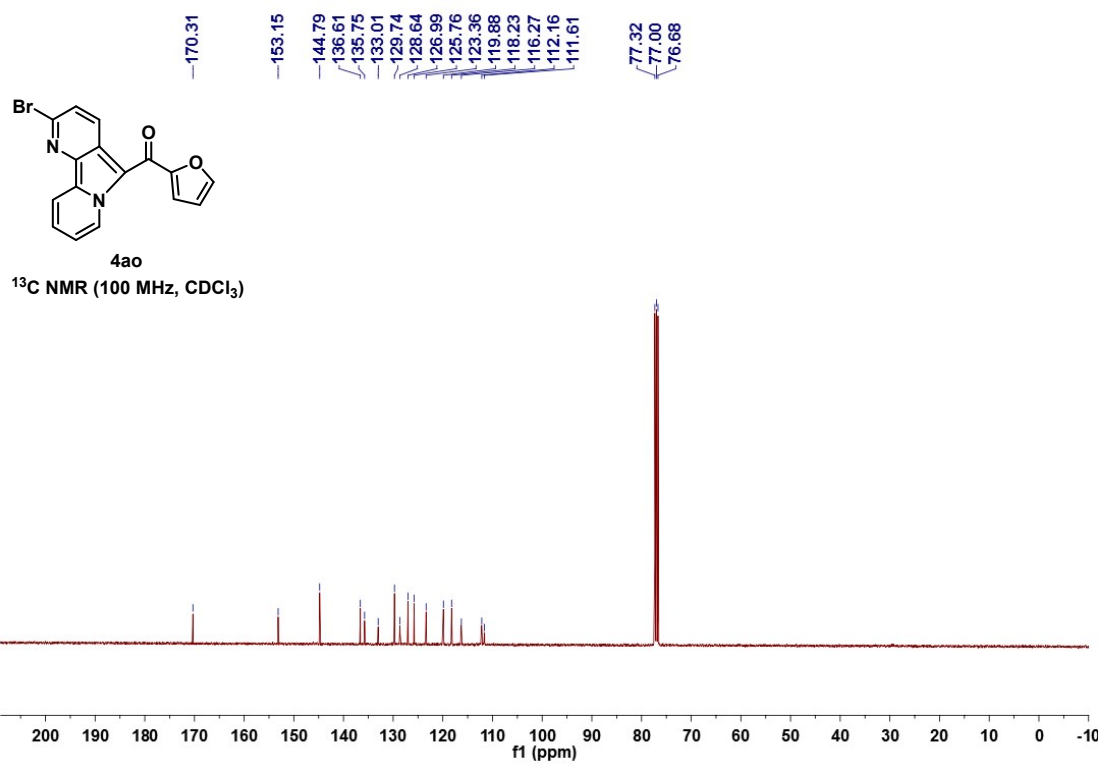

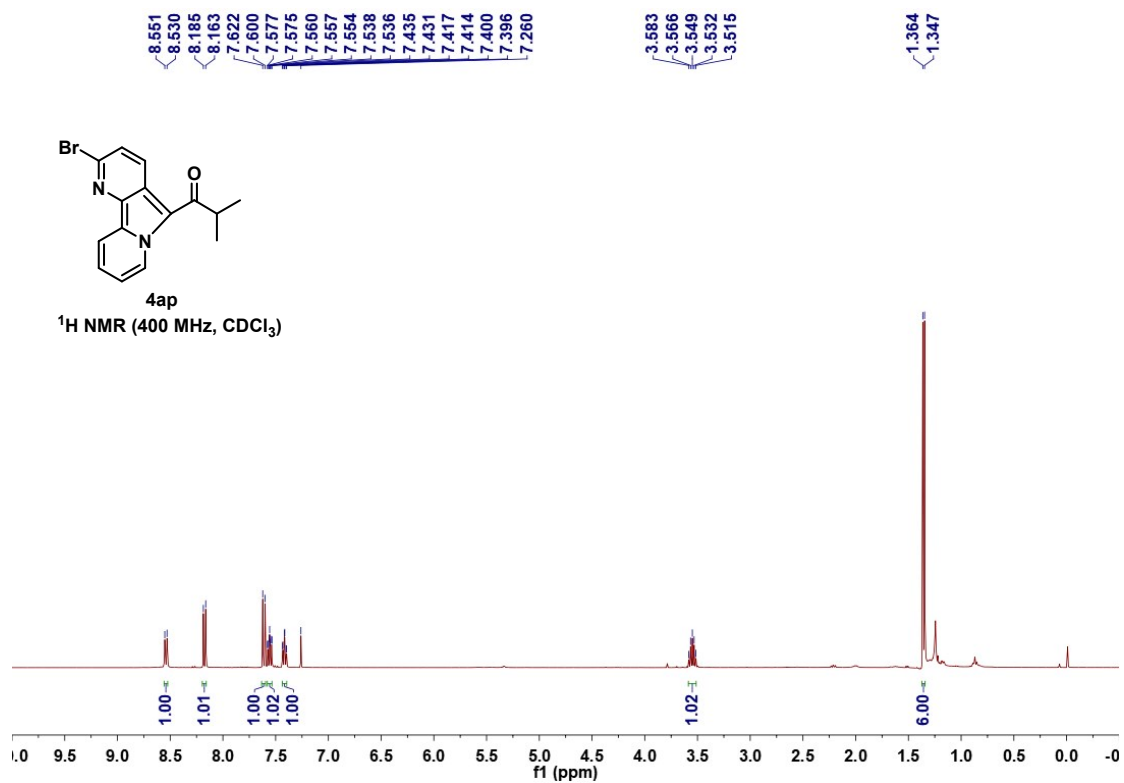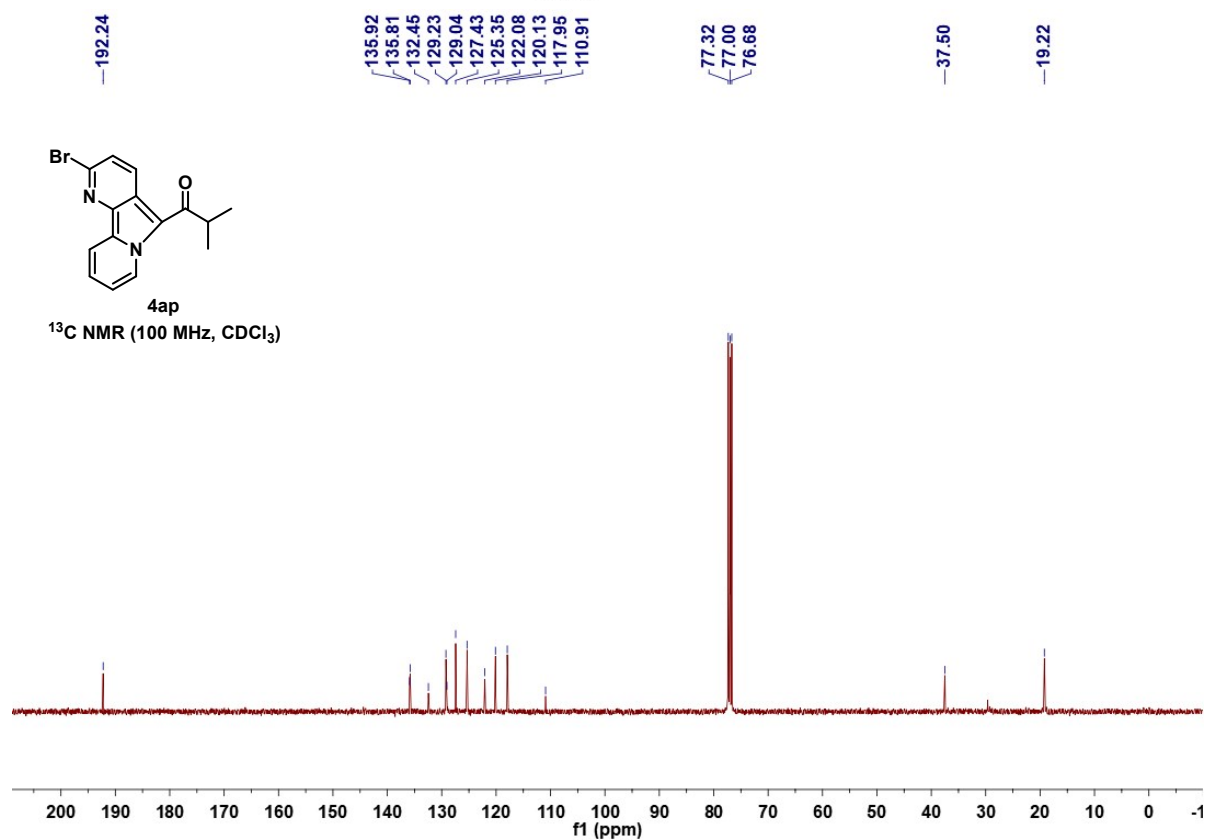

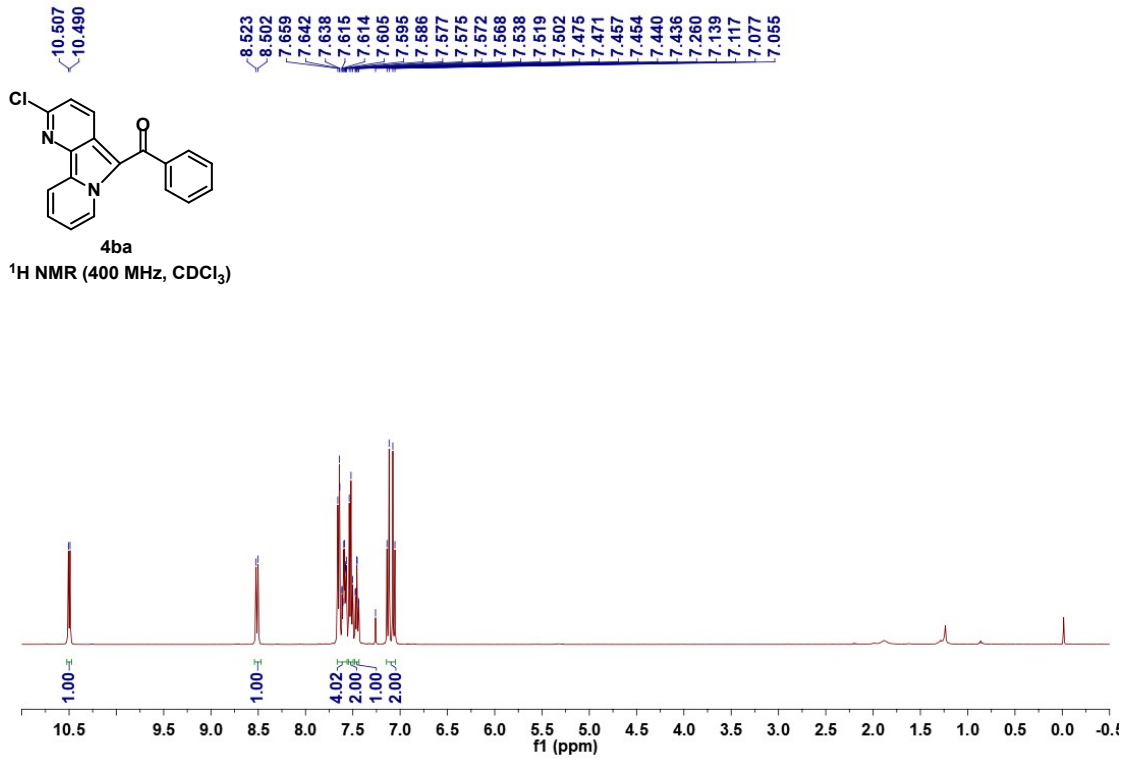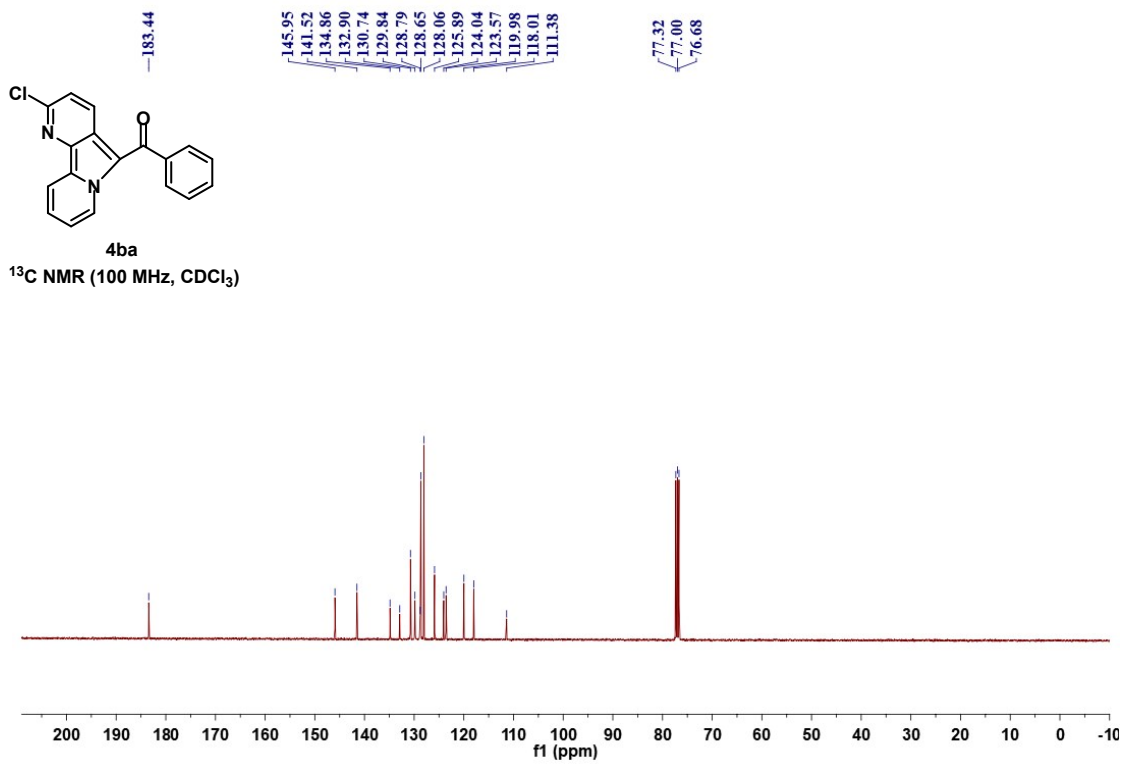

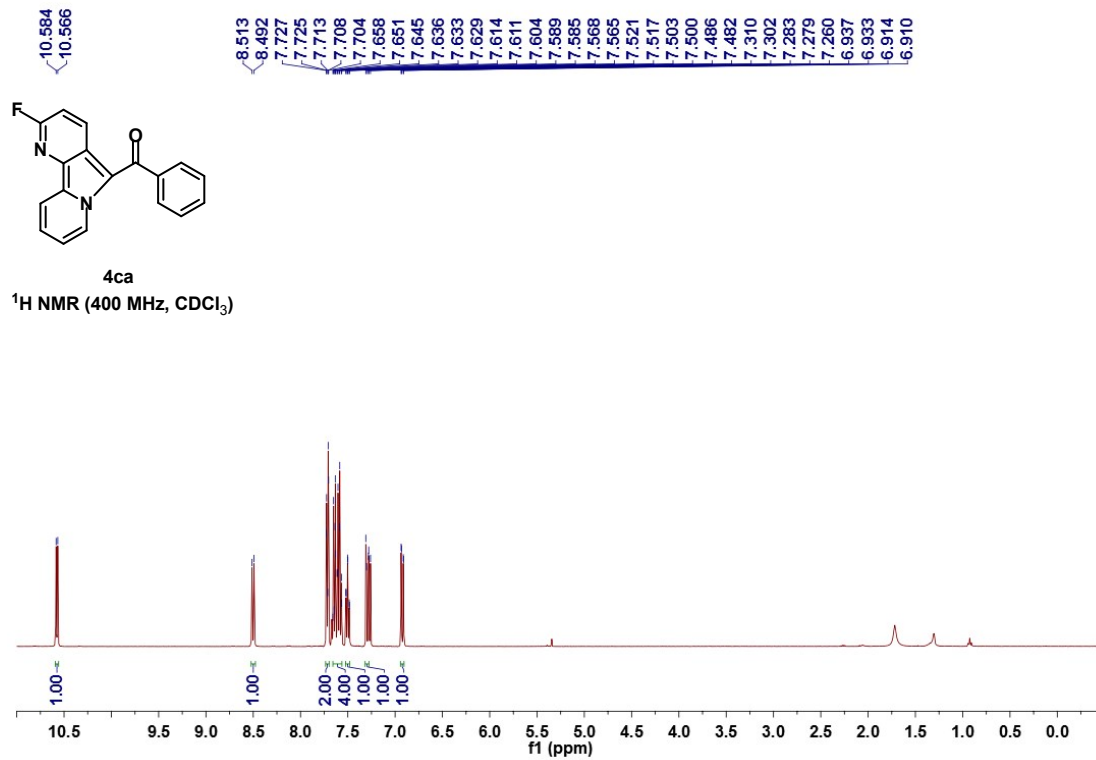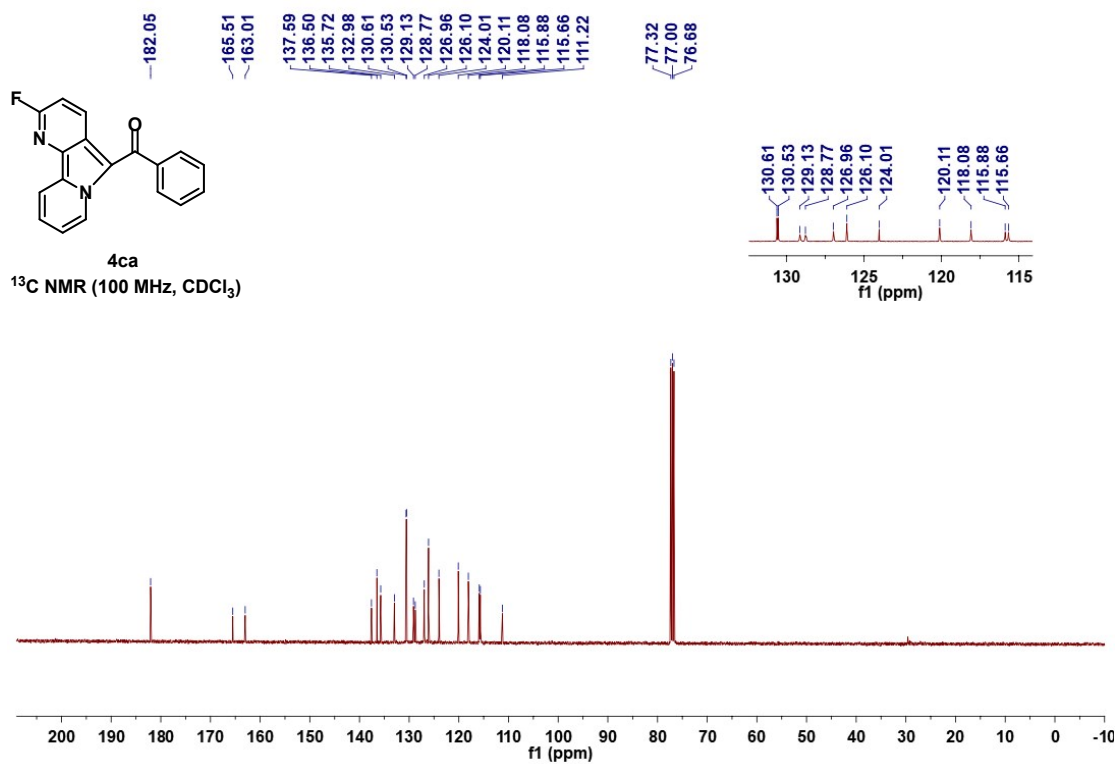



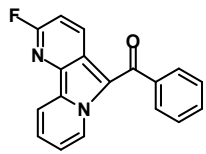

4ca

$^{19}\text{F}$  NMR (376 MHz,  $\text{CDCl}_3$ )

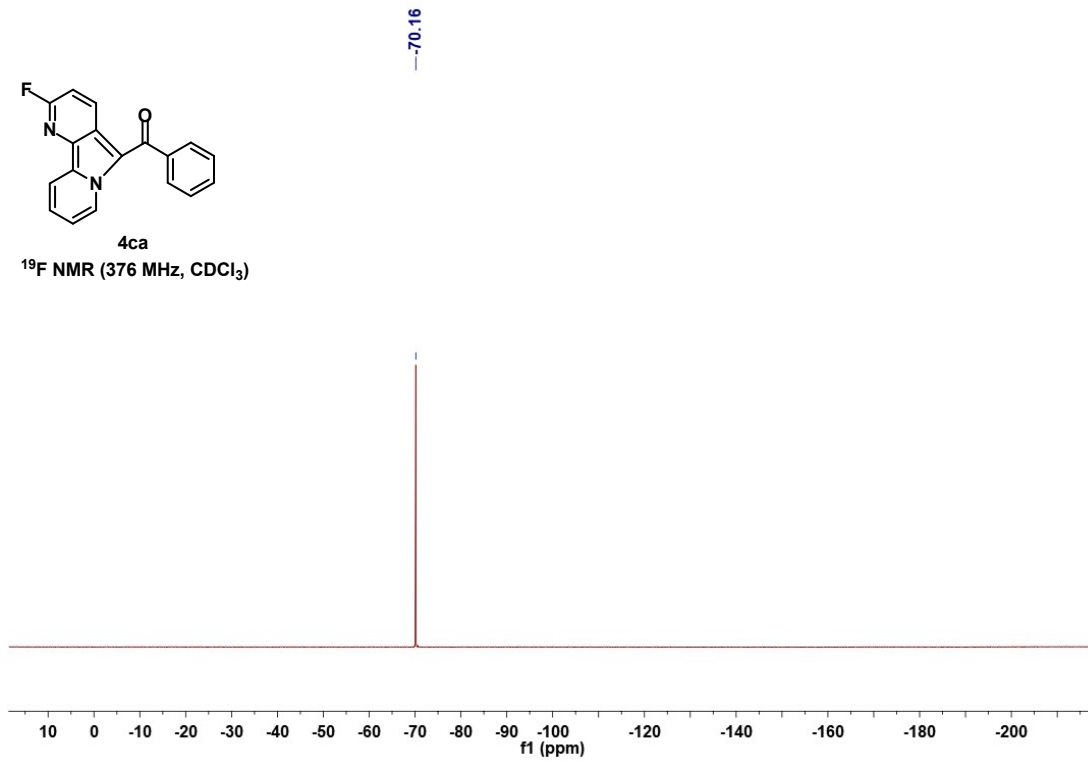

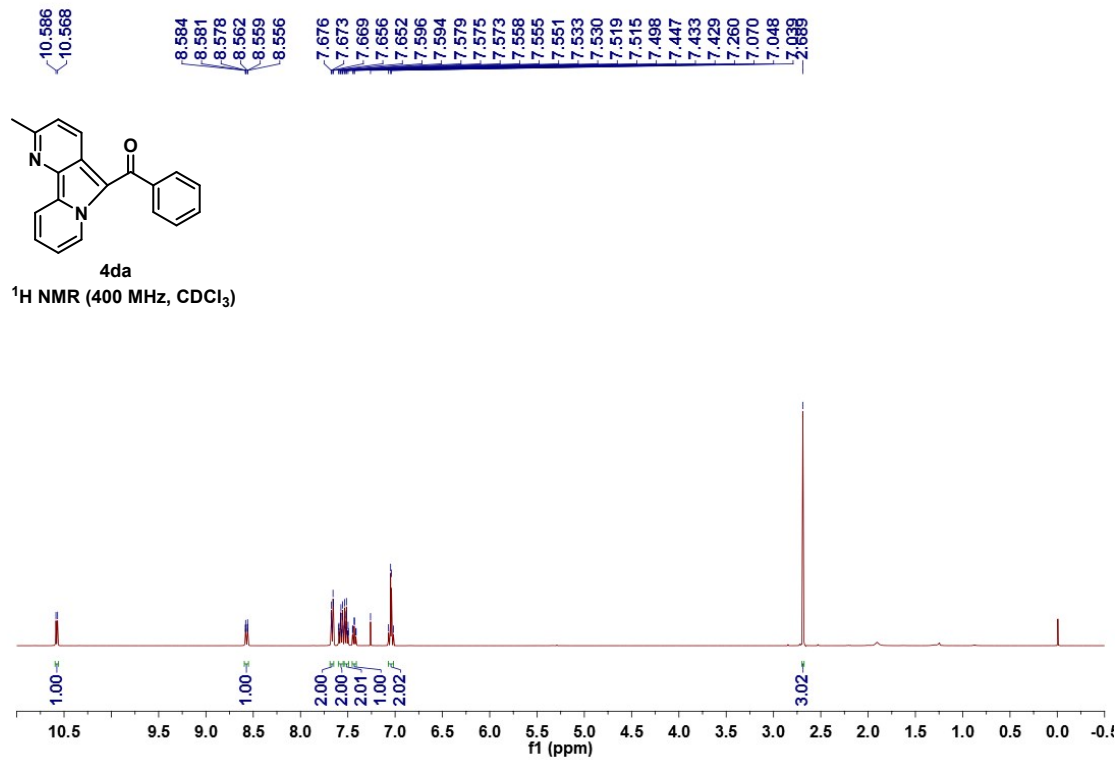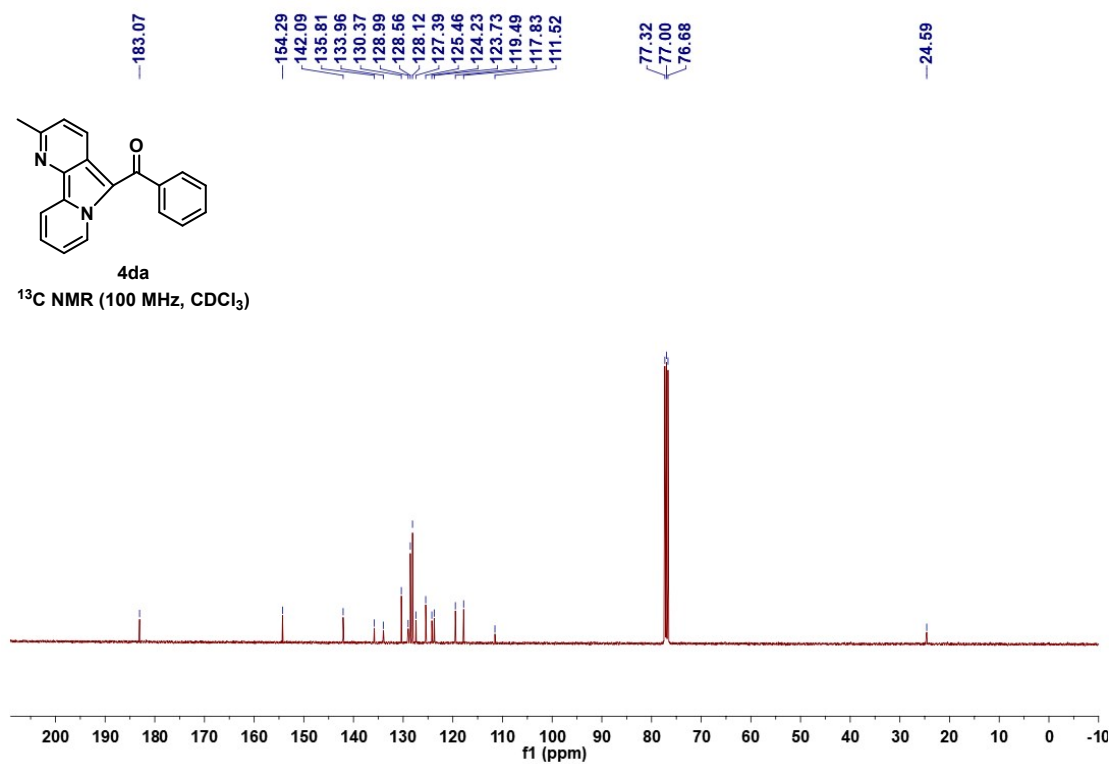

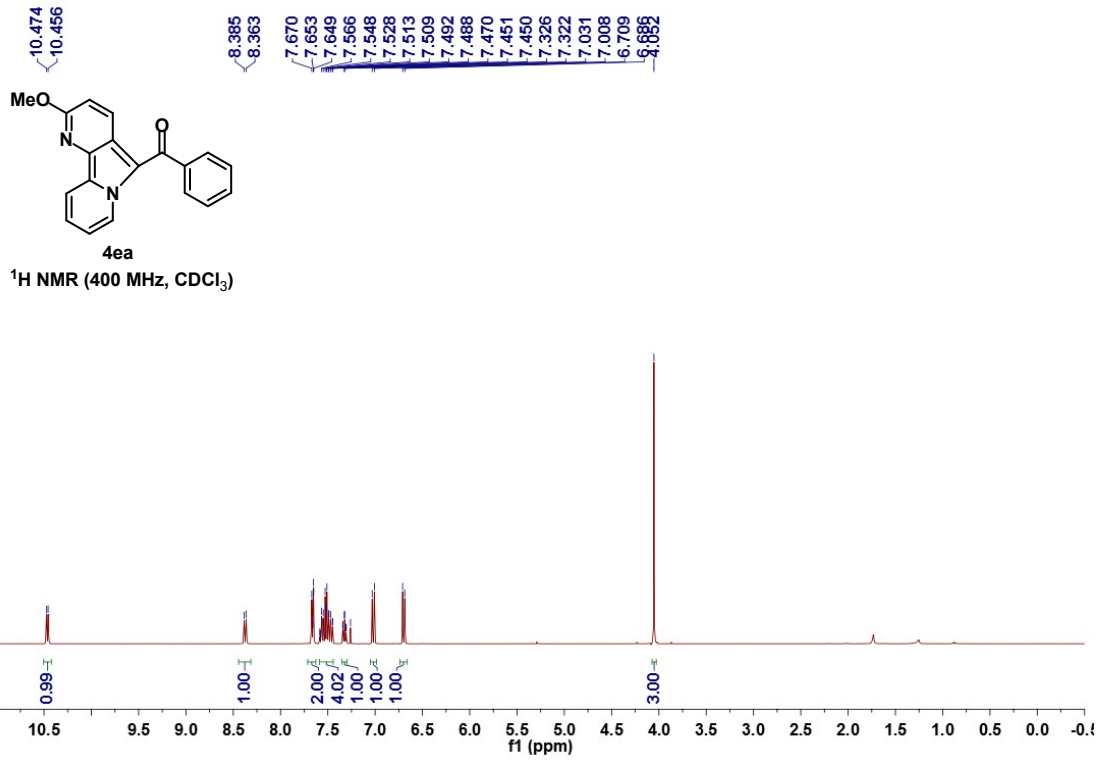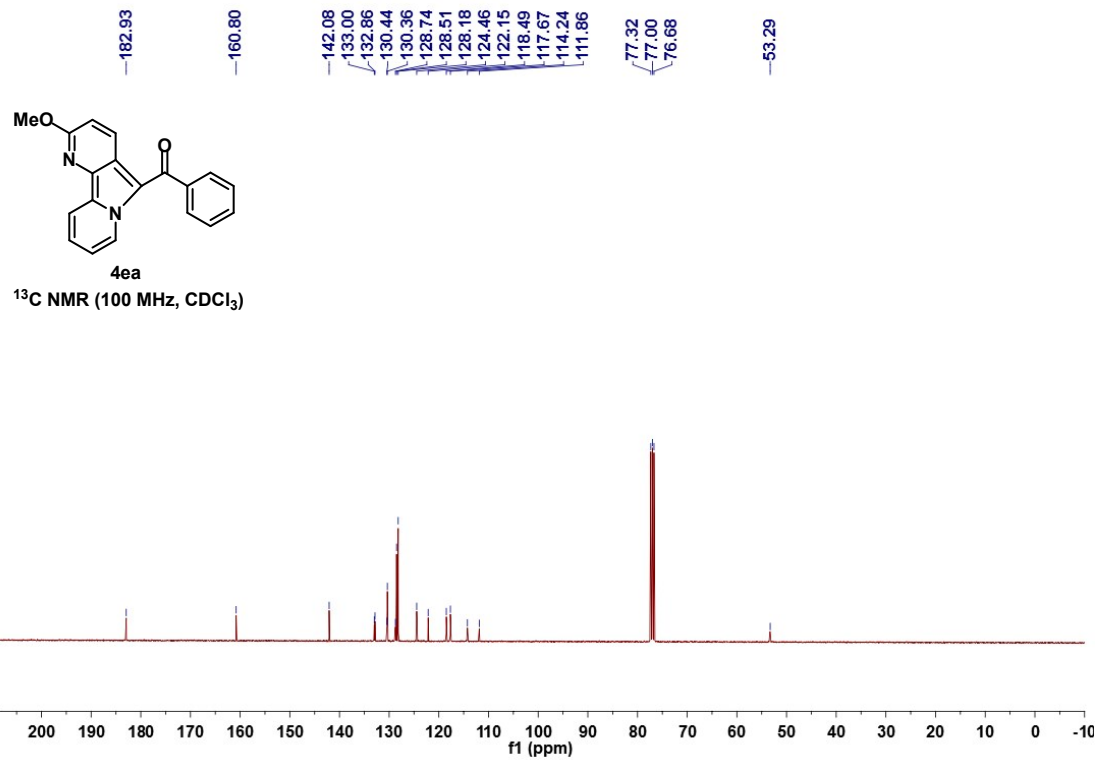

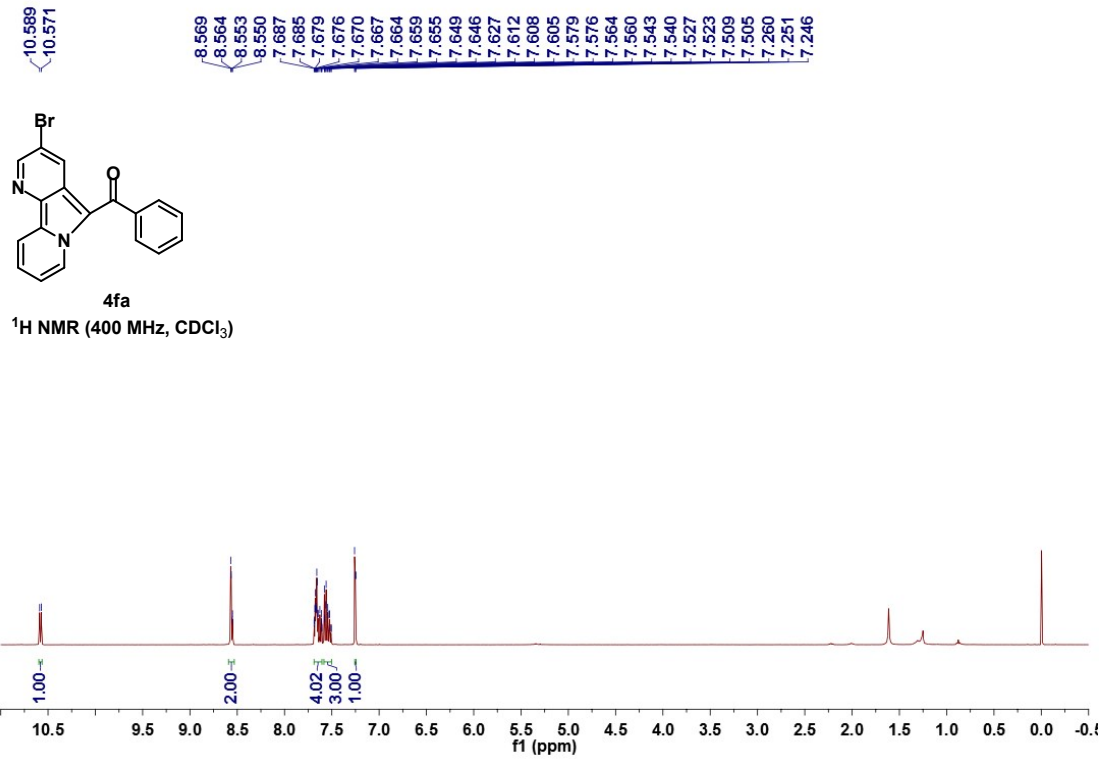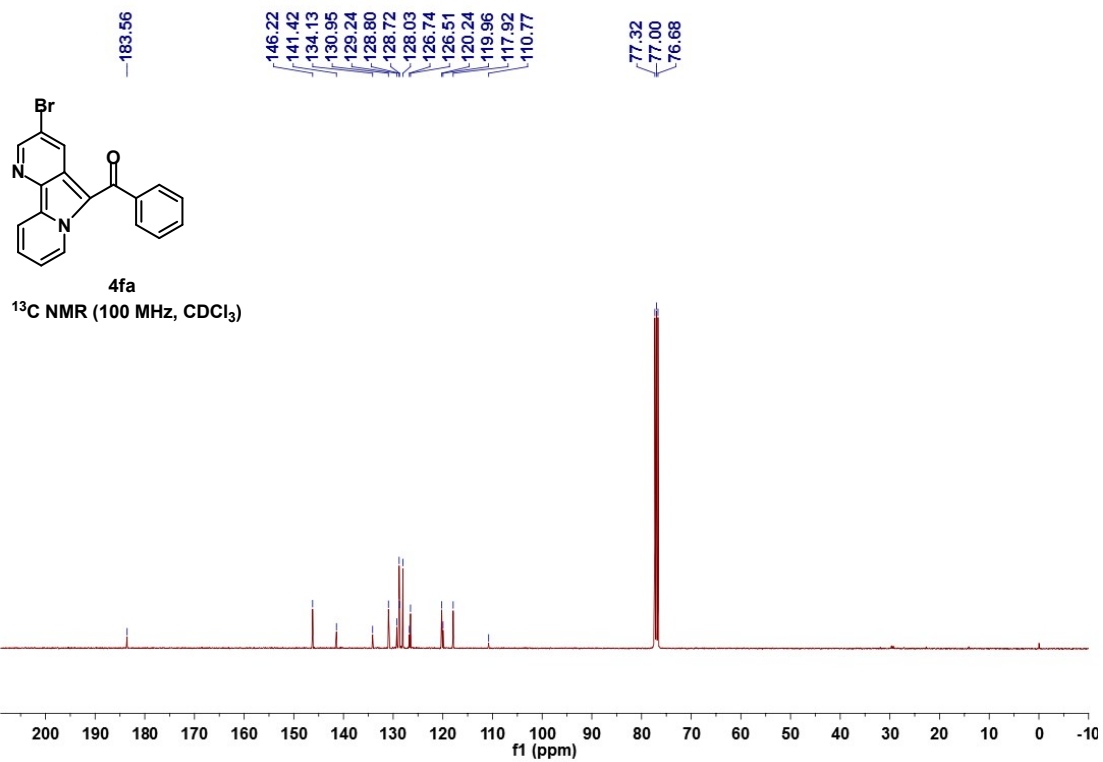

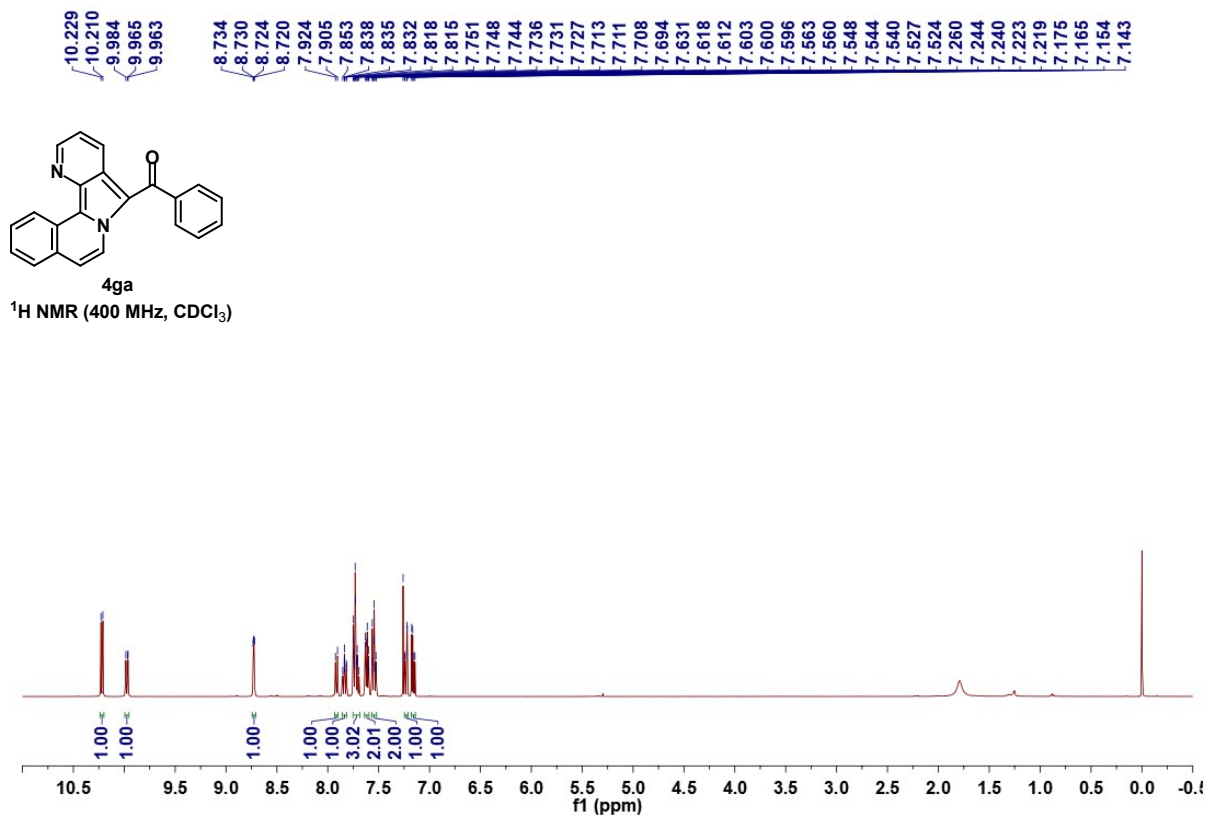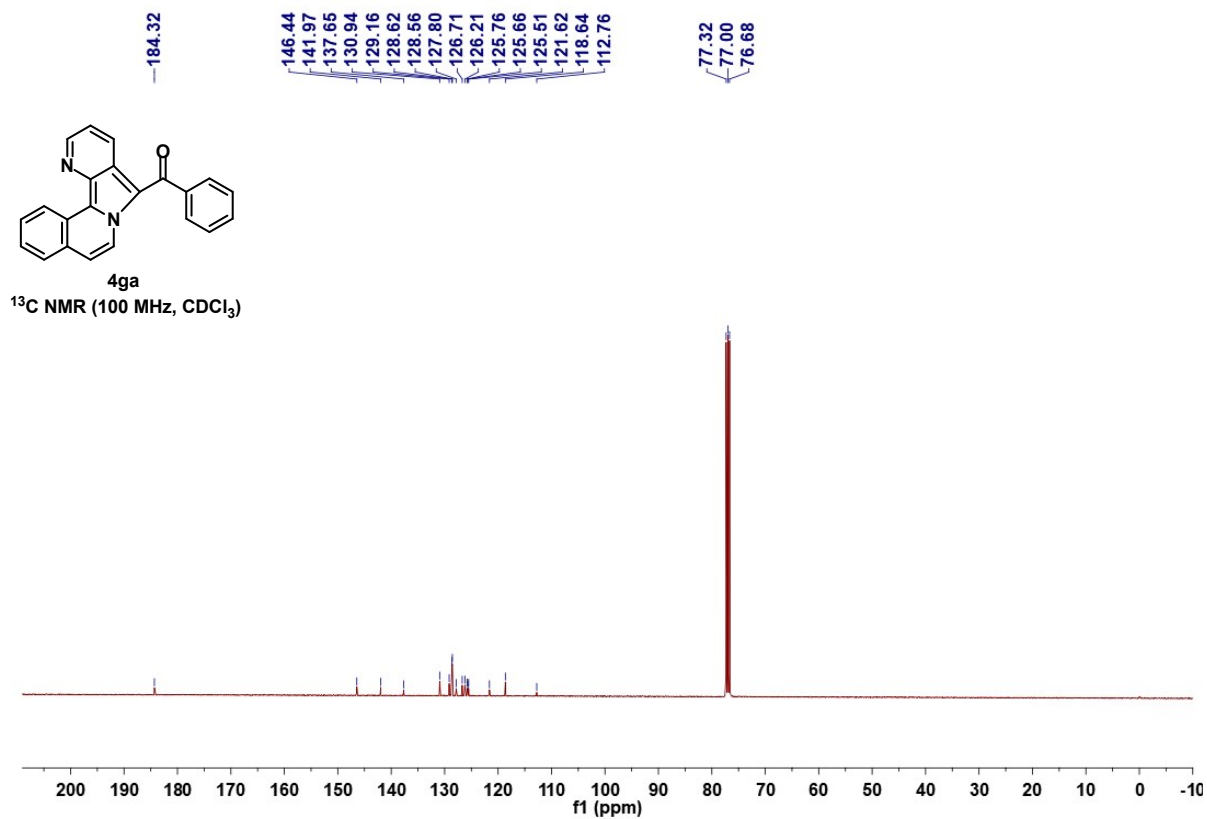

8.224  
8.204  
8.138  
7.989  
7.971  
7.968  
7.755  
7.750  
7.659  
7.640  
7.636  
7.633  
7.629  
7.625  
7.622  
7.620  
7.616  
7.565  
7.549  
7.545  
7.485  
7.466  
7.447  
7.372  
7.364  
7.359  
4.758

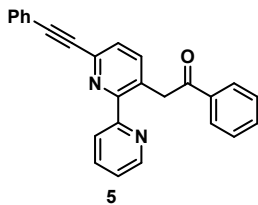

<sup>1</sup>H NMR (400 MHz, CDCl<sub>3</sub>)

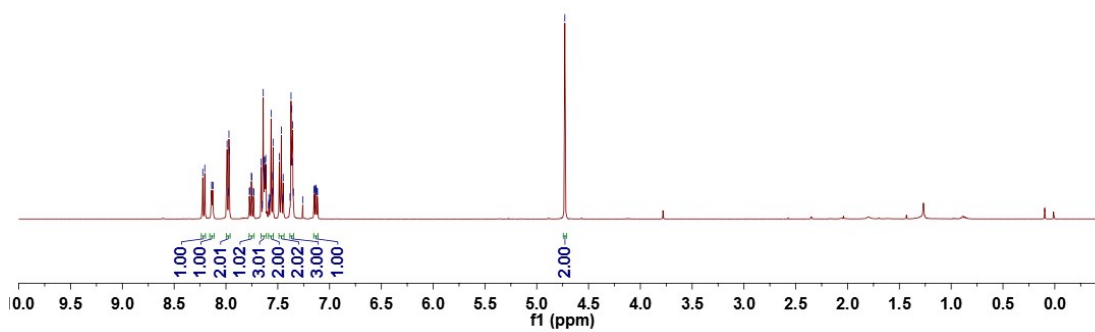

196.75  
157.20  
155.24  
147.40  
141.38  
141.07  
137.06  
136.78  
132.70  
131.99  
129.38  
128.80  
128.45  
128.27  
128.09  
126.61  
124.10  
122.96  
122.33  
88.83  
88.76  
77.32  
77.00  
76.68  
43.59

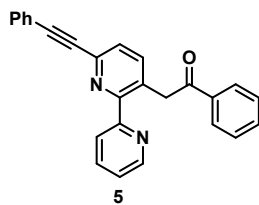

<sup>13</sup>C NMR (100 MHz, CDCl<sub>3</sub>)

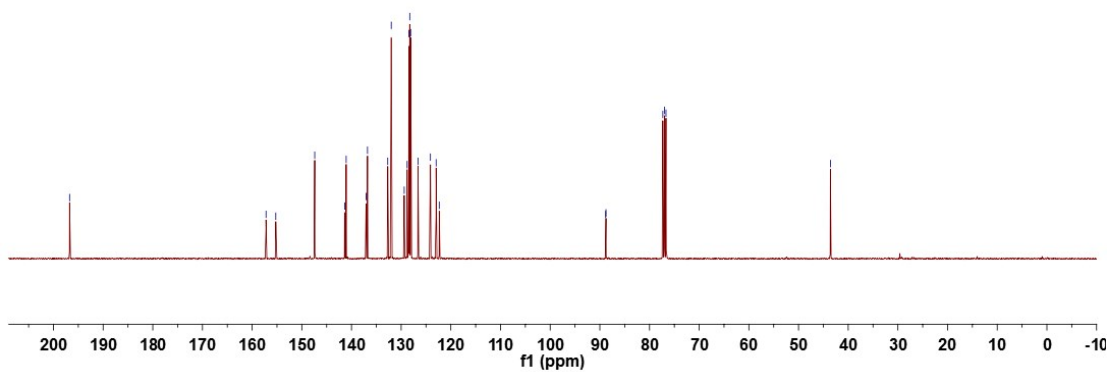

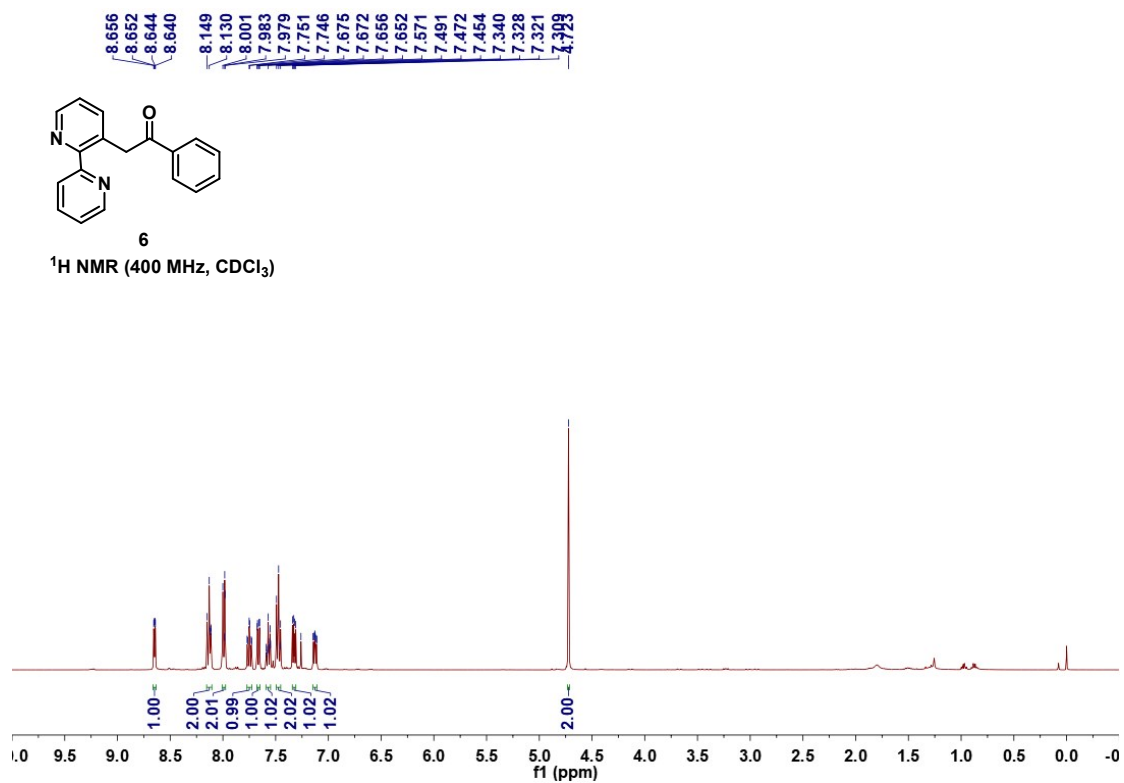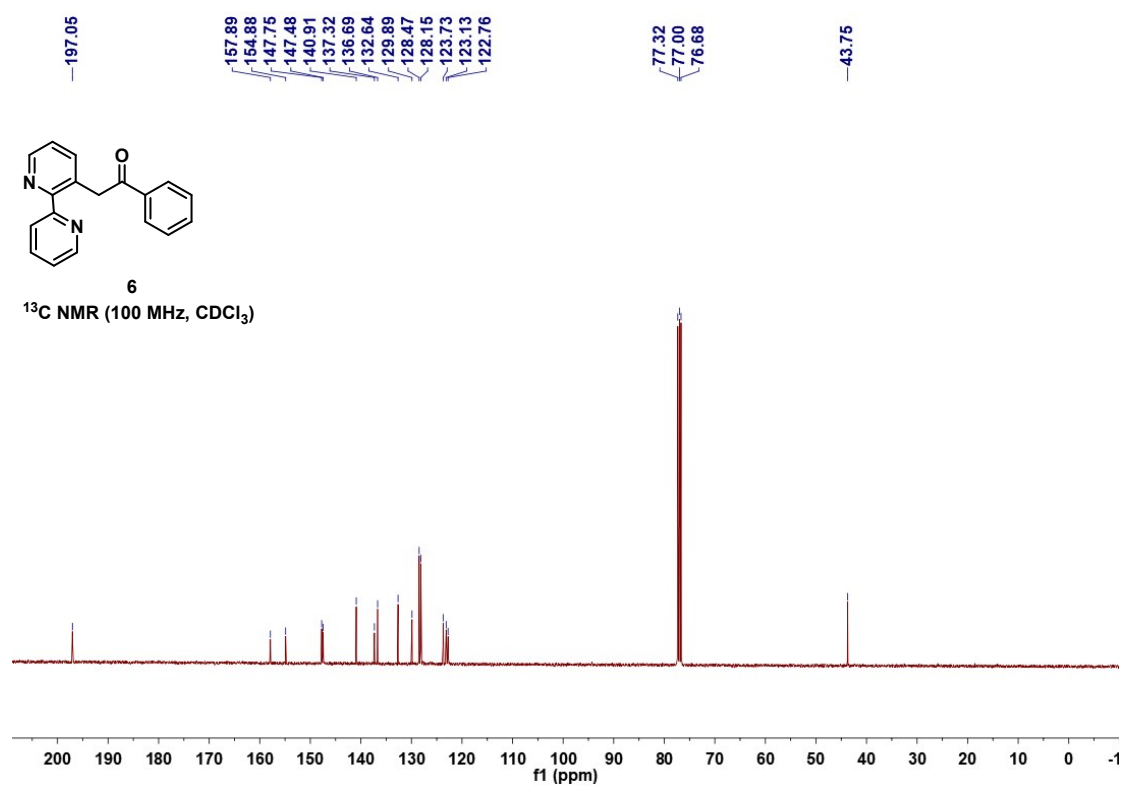

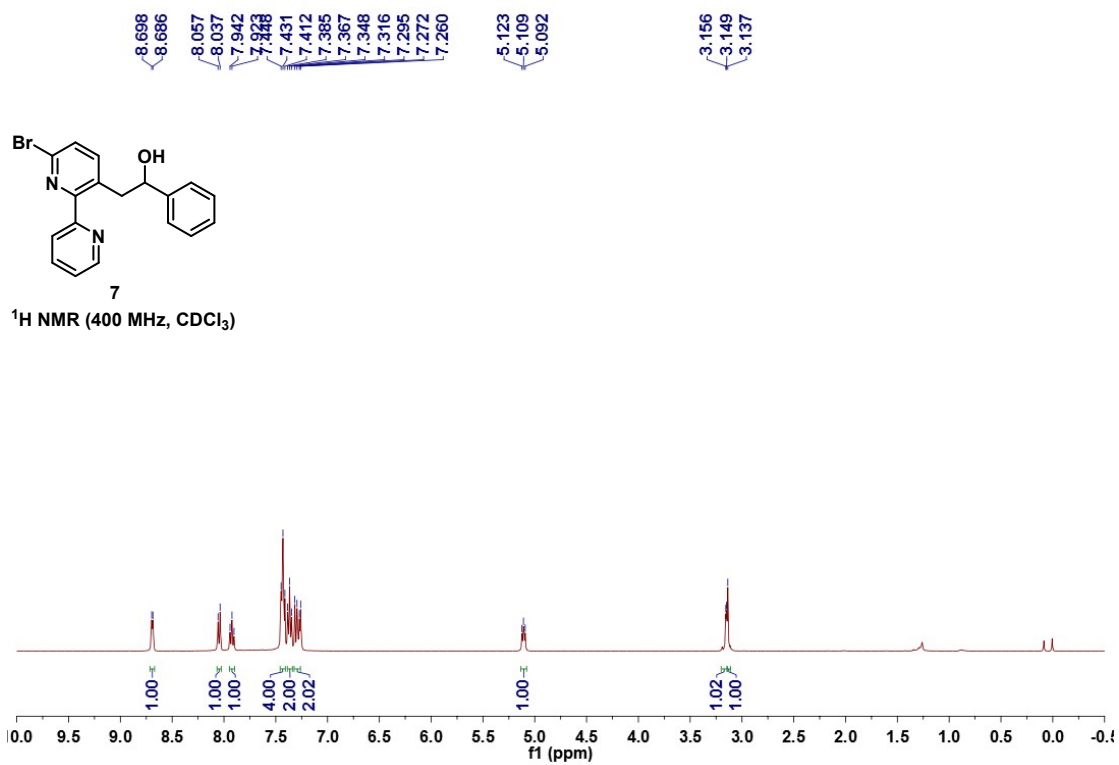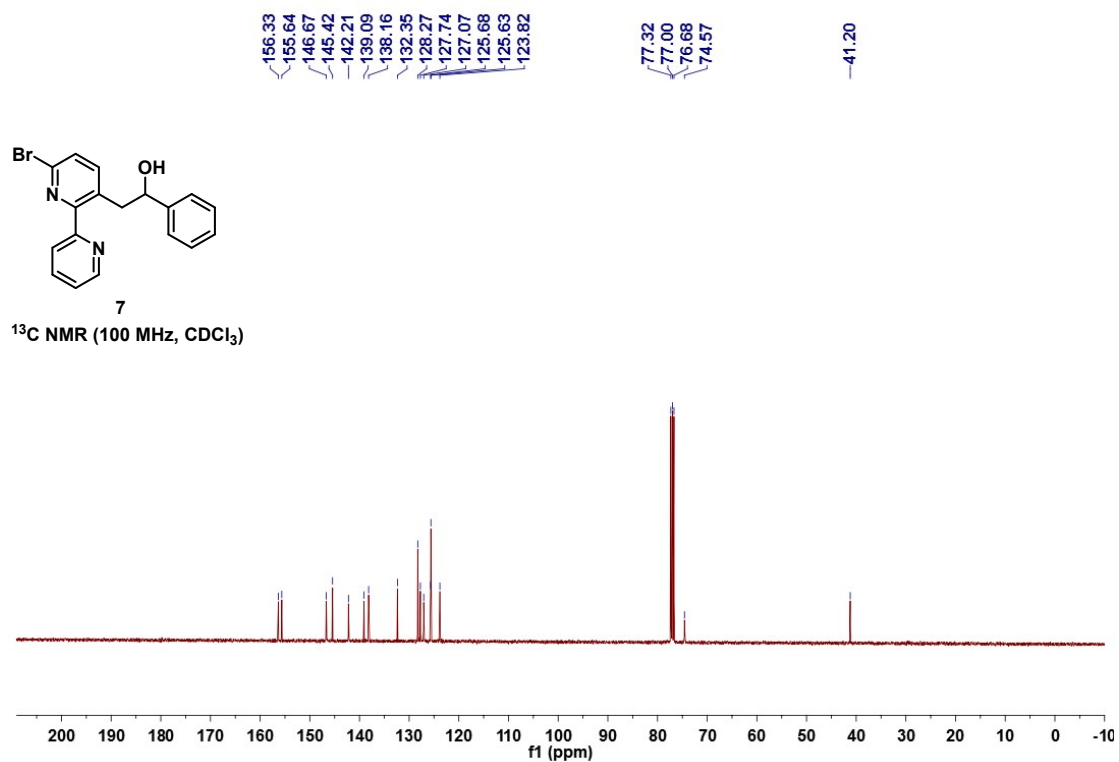



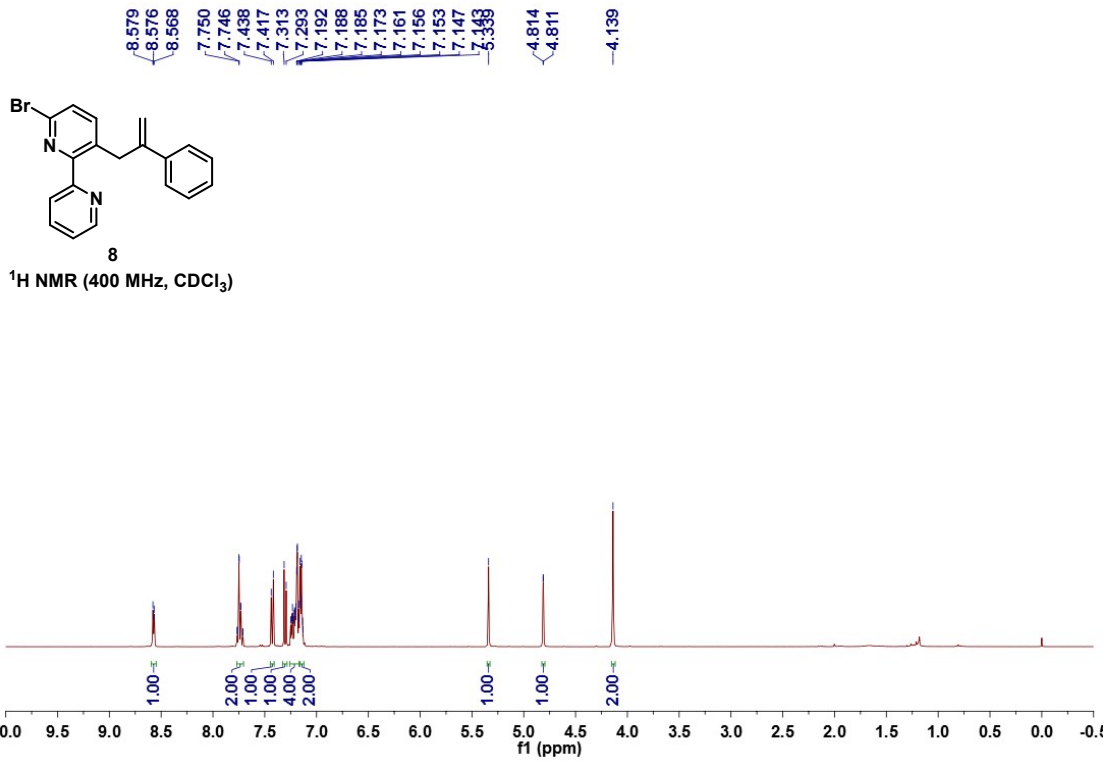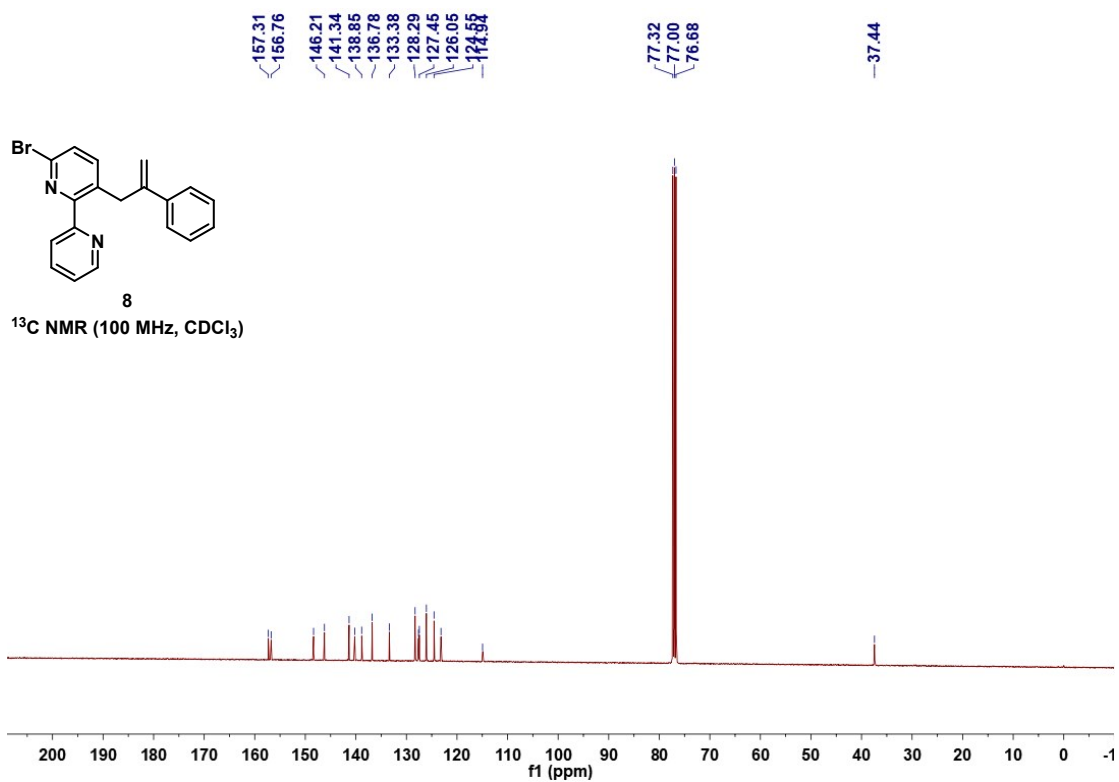

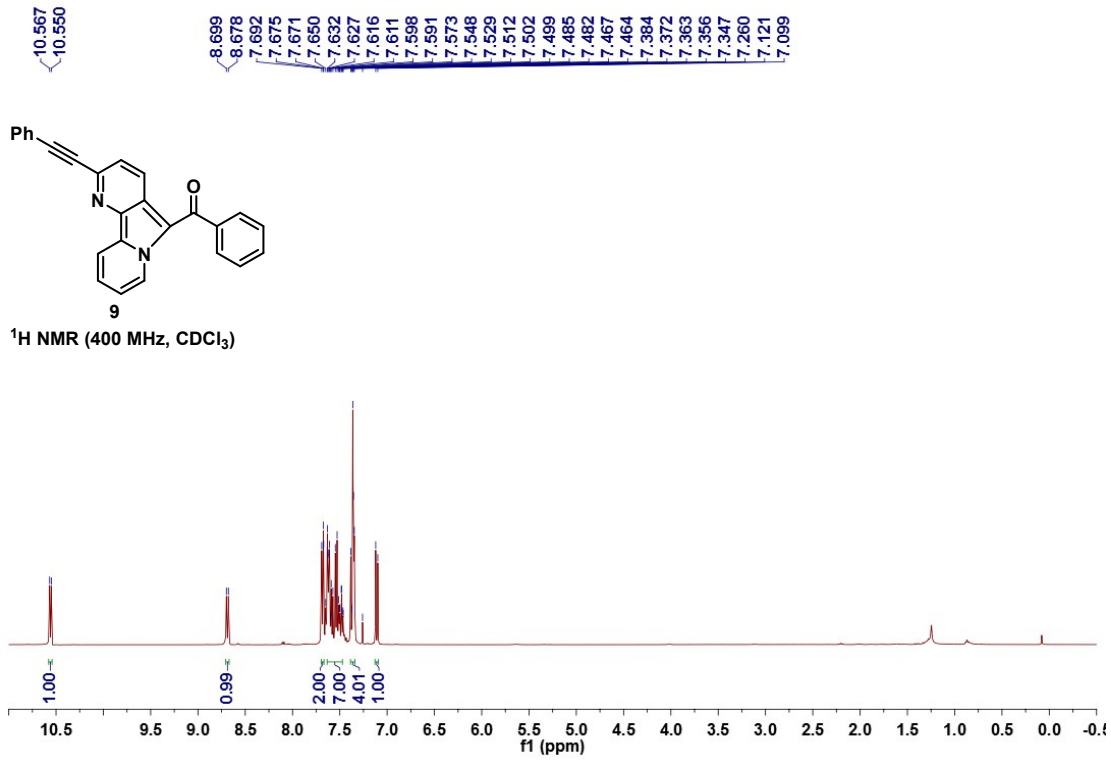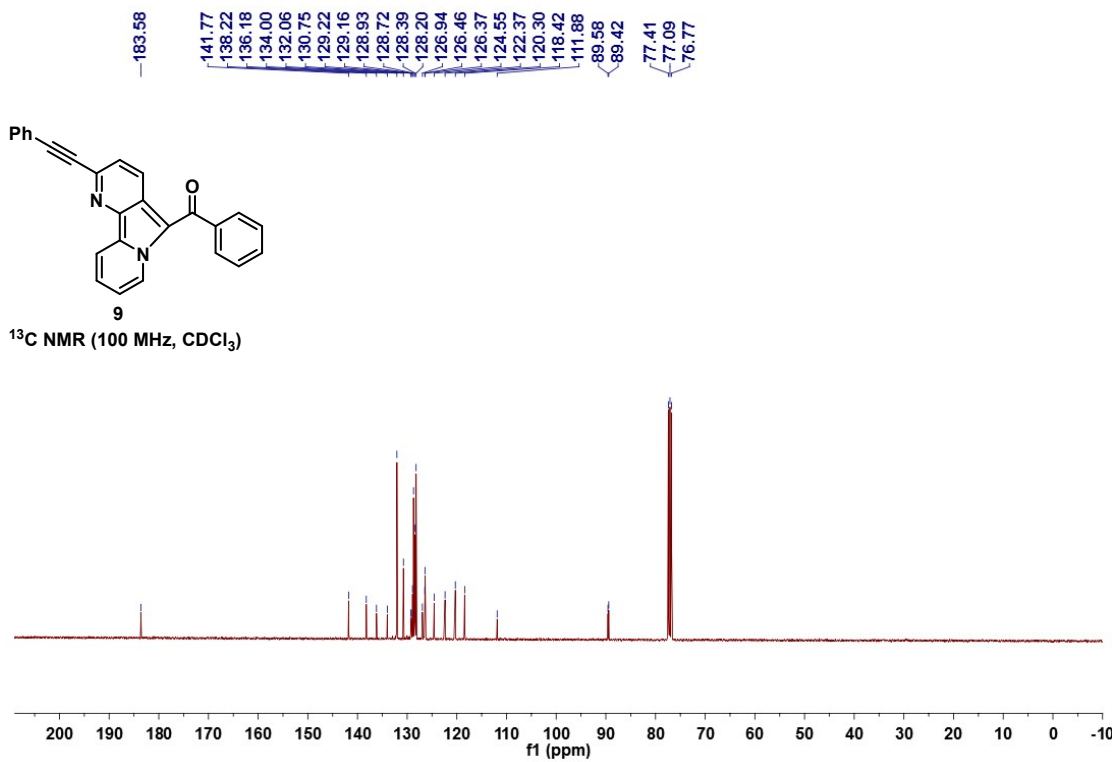

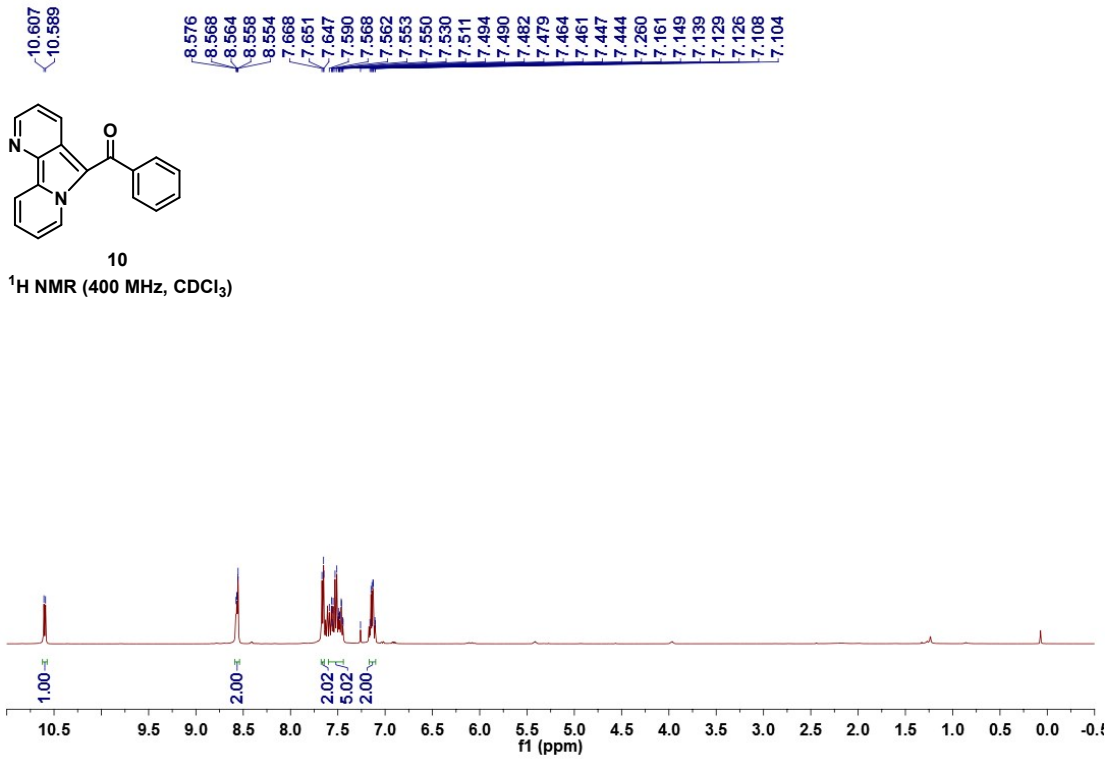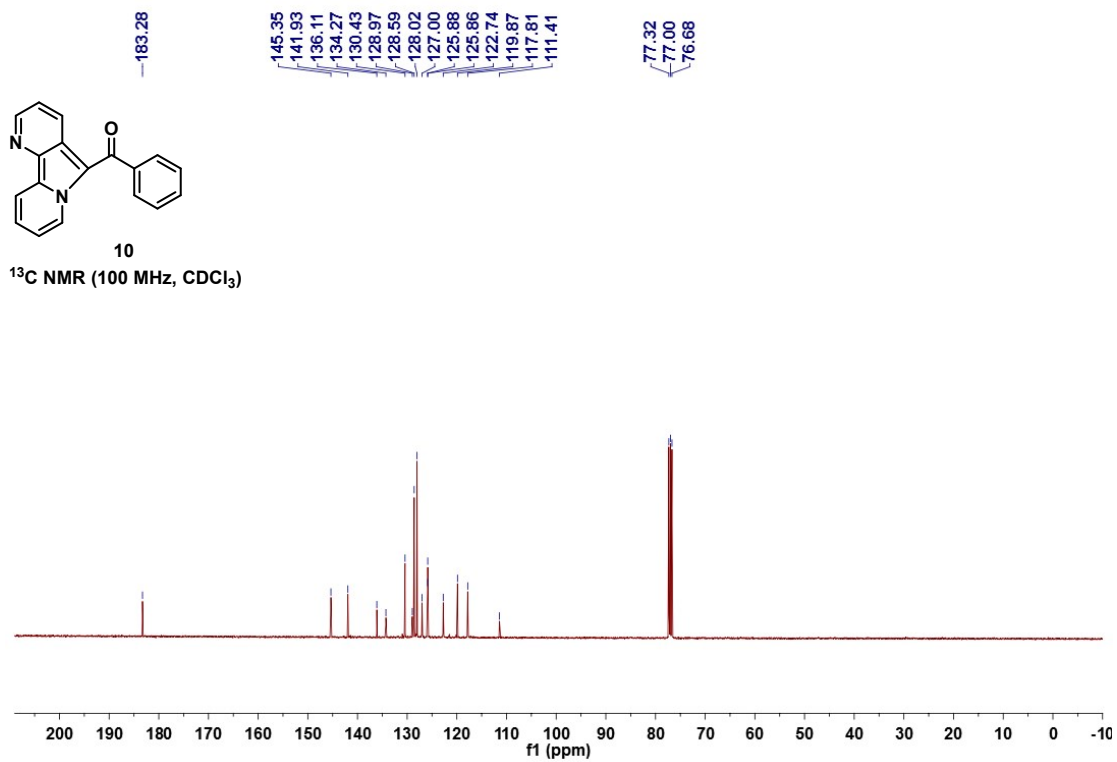

## Crystallography:

Single crystals of complexes **3ab** (CCDC reference number 2033676), **3ea** (CCDC reference number 2034526) and **4aa** (CCDC reference number 2034525) suitable for X-ray diffraction were obtained by crystallization from n-hexane/CH<sub>2</sub>Cl<sub>2</sub> (2:1). Data collection was performed on a Bruker SMART 1000, using graphite-monochromated Mo K $\alpha$  radiation ( $\omega$ -2 $\theta$  scans,  $\lambda = 0.71073$  Å). Semiempirical absorption corrections were applied for these complexes. The structures were solved by direct methods and refined by full-matrix least squares. All calculations were using the SHELXL-97 program system. The crystal data and summary of X-ray data collection are presented in Tables 1-14.

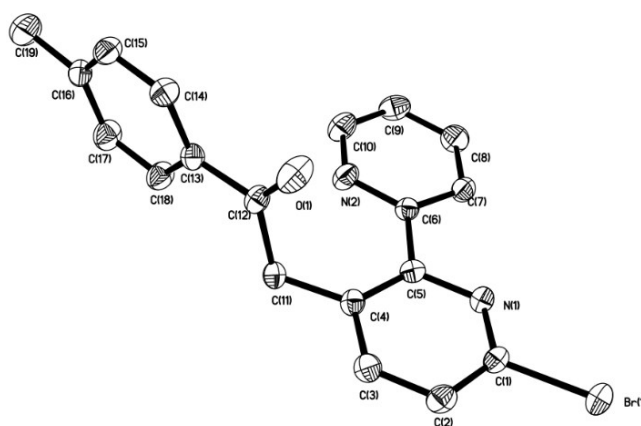

**Figure 1.** ORTEP drawing for the product **3ab**.

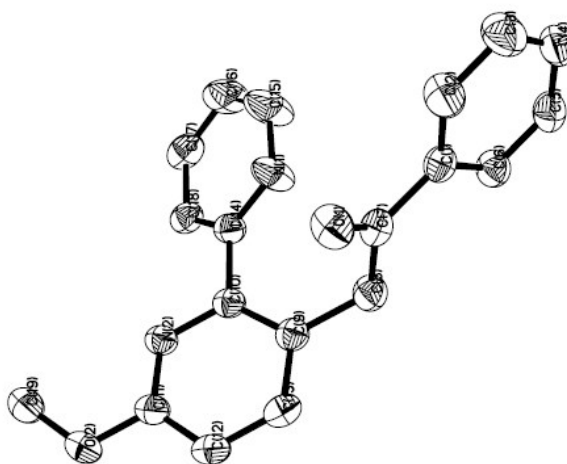

**Figure 2.** ORTEP drawing for the product **3ea**.

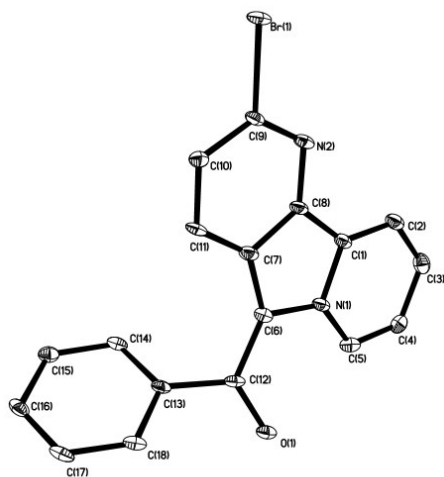

**Figure 3.** ORTEP drawing for the product **4aa**.

## X-Ray Crystallographic Data of 3ab, 3ea and 4aa:

X-Ray crystallographic data of **3ab**:

**Table 1. Crystal data and structure refinement for N191217A.**

|                                   |                                                                                                                     |
|-----------------------------------|---------------------------------------------------------------------------------------------------------------------|
| Identification code               | n191217a                                                                                                            |
| Empirical formula                 | C <sub>19</sub> H <sub>15</sub> Br N <sub>2</sub> O                                                                 |
| Formula weight                    | 367.24                                                                                                              |
| Temperature                       | 296(2) K                                                                                                            |
| Wavelength                        | 0.71073 Å                                                                                                           |
| Crystal system, space group       | Monoclinic, P 2 <sub>1</sub> /c                                                                                     |
| Unit cell dimensions              | a = 10.730(4) Å    alpha = 90 deg.<br>b = 9.218(3) Å    beta = 95.635(7) deg.<br>c = 16.091(6) Å    gamma = 90 deg. |
| Volume                            | 1583.9(10) Å <sup>3</sup>                                                                                           |
| Z, Calculated density             | 4, 1.540 Mg/m <sup>3</sup>                                                                                          |
| Absorption coefficient            | 2.601 mm <sup>-1</sup>                                                                                              |
| F(000)                            | 744                                                                                                                 |
| Crystal size                      | 0.220 x 0.210 x 0.180 mm                                                                                            |
| Theta range for data collection   | 1.907 to 26.499 deg.                                                                                                |
| Limiting indices                  | -13 ≤ h ≤ 13, -9 ≤ k ≤ 11, -20 ≤ l ≤ 18                                                                             |
| Reflections collected / unique    | 10044 / 3285 [R(int) = 0.0611]                                                                                      |
| Completeness to theta = 25.242    | 99.9 %                                                                                                              |
| Absorption correction             | Semi-empirical from equivalents                                                                                     |
| Refinement method                 | Full-matrix least-squares on F <sup>2</sup>                                                                         |
| Data / restraints / parameters    | 3285 / 0 / 208                                                                                                      |
| Goodness-of-fit on F <sup>2</sup> | 1.030                                                                                                               |
| Final R indices [I > 2σ(I)]       | R1 = 0.0416, wR2 = 0.0812                                                                                           |
| R indices (all data)              | R1 = 0.0737, wR2 = 0.0885                                                                                           |
| Extinction coefficient            | n/a                                                                                                                 |
| Largest diff. peak and hole       | 0.337 and -0.433 e.Å <sup>-3</sup>                                                                                  |

**Table 2. Atomic coordinates (  $\times 10^4$ ) and equivalent isotropic displacement parameters ( $\text{\AA}^2 \times 10^3$ ) for N191217A.  $U(\text{eq})$  is defined as one third of the trace of the orthogonalized  $U_{ij}$  tensor.**

|       | x       | y       | z       | $U(\text{eq})$ |
|-------|---------|---------|---------|----------------|
| Br(1) | 6298(1) | 5282(1) | 2119(1) | 46(1)          |
| N(1)  | 4741(2) | 5400(3) | 3364(2) | 35(1)          |
| N(2)  | 2626(2) | 5526(3) | 4947(2) | 44(1)          |
| O(1)  | 2653(2) | 8942(3) | 4460(2) | 61(1)          |
| C(1)  | 5677(3) | 6092(3) | 3081(2) | 34(1)          |
| C(2)  | 6232(3) | 7317(3) | 3439(2) | 42(1)          |
| C(3)  | 5760(3) | 7817(3) | 4142(2) | 40(1)          |
| C(4)  | 4760(3) | 7143(3) | 4477(2) | 33(1)          |
| C(5)  | 4264(2) | 5921(3) | 4054(2) | 32(1)          |
| C(6)  | 3205(3) | 5041(3) | 4313(2) | 33(1)          |
| C(7)  | 2850(3) | 3766(3) | 3900(2) | 43(1)          |
| C(8)  | 1884(3) | 2956(4) | 4168(2) | 53(1)          |
| C(9)  | 1291(3) | 3460(4) | 4822(2) | 53(1)          |
| C(10) | 1692(3) | 4731(4) | 5193(2) | 53(1)          |
| C(11) | 4314(3) | 7745(3) | 5254(2) | 38(1)          |
| C(12) | 3043(3) | 8460(3) | 5135(2) | 35(1)          |
| C(13) | 2327(3) | 8660(3) | 5870(2) | 34(1)          |
| C(14) | 1302(3) | 9578(3) | 5797(2) | 42(1)          |
| C(15) | 582(3)  | 9766(4) | 6446(2) | 49(1)          |
| C(16) | 849(3)  | 9054(4) | 7196(2) | 47(1)          |
| C(17) | 1889(3) | 8176(4) | 7269(2) | 53(1)          |
| C(18) | 2620(3) | 7979(4) | 6626(2) | 48(1)          |
| C(19) | 40(3)   | 9216(5) | 7891(2) | 73(1)          |

**Table 3. Bond lengths [Å] and angles [deg] for N191217A.**

---

|                 |          |
|-----------------|----------|
| Br(1)-C(1)      | 1.899(3) |
| N(1)-C(1)       | 1.309(4) |
| N(1)-C(5)       | 1.355(4) |
| N(2)-C(6)       | 1.324(4) |
| N(2)-C(10)      | 1.333(4) |
| O(1)-C(12)      | 1.210(3) |
| C(1)-C(2)       | 1.376(4) |
| C(2)-C(3)       | 1.365(4) |
| C(2)-H(2)       | 0.9300   |
| C(3)-C(4)       | 1.393(4) |
| C(3)-H(3)       | 0.9300   |
| C(4)-C(5)       | 1.394(4) |
| C(4)-C(11)      | 1.489(4) |
| C(5)-C(6)       | 1.489(4) |
| C(6)-C(7)       | 1.385(4) |
| C(7)-C(8)       | 1.381(4) |
| C(7)-H(7)       | 0.9300   |
| C(8)-C(9)       | 1.364(5) |
| C(8)-H(8)       | 0.9300   |
| C(9)-C(10)      | 1.365(5) |
| C(9)-H(9)       | 0.9300   |
| C(10)-H(10)     | 0.9300   |
| C(11)-C(12)     | 1.509(4) |
| C(11)-H(11A)    | 0.9700   |
| C(11)-H(11B)    | 0.9700   |
| C(12)-C(13)     | 1.483(4) |
| C(13)-C(18)     | 1.378(4) |
| C(13)-C(14)     | 1.384(4) |
| C(14)-C(15)     | 1.369(5) |
| C(14)-H(14)     | 0.9300   |
| C(15)-C(16)     | 1.379(5) |
| C(15)-H(15)     | 0.9300   |
| C(16)-C(17)     | 1.374(5) |
| C(16)-C(19)     | 1.489(5) |
| C(17)-C(18)     | 1.370(4) |
| C(17)-H(17)     | 0.9300   |
| C(18)-H(18)     | 0.9300   |
| C(19)-H(19A)    | 0.9600   |
| C(19)-H(19B)    | 0.9600   |
| C(19)-H(19C)    | 0.9600   |
| C(1)-N(1)-C(5)  | 118.4(3) |
| C(6)-N(2)-C(10) | 117.8(3) |



|                     |          |
|---------------------|----------|
| N(1)-C(1)-C(2)      | 124.8(3) |
| N(1)-C(1)-Br(1)     | 115.8(2) |
| C(2)-C(1)-Br(1)     | 119.4(2) |
| C(3)-C(2)-C(1)      | 116.3(3) |
| C(3)-C(2)-H(2)      | 121.8    |
| C(1)-C(2)-H(2)      | 121.8    |
| C(2)-C(3)-C(4)      | 122.2(3) |
| C(2)-C(3)-H(3)      | 118.9    |
| C(4)-C(3)-H(3)      | 118.9    |
| C(5)-C(4)-C(3)      | 116.3(3) |
| C(5)-C(4)-C(11)     | 124.9(3) |
| C(3)-C(4)-C(11)     | 118.8(3) |
| N(1)-C(5)-C(4)      | 122.0(3) |
| N(1)-C(5)-C(6)      | 113.3(2) |
| C(4)-C(5)-C(6)      | 124.7(3) |
| N(2)-C(6)-C(7)      | 121.9(3) |
| N(2)-C(6)-C(5)      | 117.4(3) |
| C(7)-C(6)-C(5)      | 120.6(3) |
| C(8)-C(7)-C(6)      | 119.3(3) |
| C(8)-C(7)-H(7)      | 120.4    |
| C(6)-C(7)-H(7)      | 120.4    |
| C(9)-C(8)-C(7)      | 118.5(3) |
| C(9)-C(8)-H(8)      | 120.7    |
| C(7)-C(8)-H(8)      | 120.7    |
| C(8)-C(9)-C(10)     | 118.6(3) |
| C(8)-C(9)-H(9)      | 120.7    |
| C(10)-C(9)-H(9)     | 120.7    |
| N(2)-C(10)-C(9)     | 123.8(3) |
| N(2)-C(10)-H(10)    | 118.1    |
| C(9)-C(10)-H(10)    | 118.1    |
| C(4)-C(11)-C(12)    | 114.7(2) |
| C(4)-C(11)-H(11A)   | 108.6    |
| C(12)-C(11)-H(11A)  | 108.6    |
| C(4)-C(11)-H(11B)   | 108.6    |
| C(12)-C(11)-H(11B)  | 108.6    |
| H(11A)-C(11)-H(11B) | 107.6    |
| O(1)-C(12)-C(13)    | 120.7(3) |
| O(1)-C(12)-C(11)    | 120.1(3) |
| C(13)-C(12)-C(11)   | 119.1(3) |
| C(18)-C(13)-C(14)   | 117.6(3) |
| C(18)-C(13)-C(12)   | 123.8(3) |
| C(14)-C(13)-C(12)   | 118.6(3) |
| C(15)-C(14)-C(13)   | 121.1(3) |
| C(15)-C(14)-H(14)   | 119.4    |

|                     |          |
|---------------------|----------|
| C(13)-C(14)-H(14)   | 119.4    |
| C(14)-C(15)-C(16)   | 121.5(3) |
| C(14)-C(15)-H(15)   | 119.3    |
| C(16)-C(15)-H(15)   | 119.3    |
| C(17)-C(16)-C(15)   | 116.9(3) |
| C(17)-C(16)-C(19)   | 121.6(3) |
| C(15)-C(16)-C(19)   | 121.5(3) |
| C(18)-C(17)-C(16)   | 122.3(3) |
| C(18)-C(17)-H(17)   | 118.8    |
| C(16)-C(17)-H(17)   | 118.8    |
| C(17)-C(18)-C(13)   | 120.5(3) |
| C(17)-C(18)-H(18)   | 119.7    |
| C(13)-C(18)-H(18)   | 119.7    |
| C(16)-C(19)-H(19A)  | 109.4    |
| C(16)-C(19)-H(19B)  | 109.6    |
| H(19A)-C(19)-H(19B) | 109.5    |
| C(16)-C(19)-H(19C)  | 109.5    |
| H(19A)-C(19)-H(19C) | 109.5    |
| H(19B)-C(19)-H(19C) | 109.5    |

---

Symmetry transformations used to generate equivalent atoms:

**Table 4. Anisotropic displacement parameters ( $\text{\AA}^2 \times 10^3$ ) for N191217A.****The anisotropic displacement factor exponent takes the form:**

$$-2 \pi^2 [ h^2 a^{*2} U_{11} + \dots + 2 h k a^* b^* U_{12} ]$$

|       | U11   | U22    | U33   | U23    | U13   | U12    |
|-------|-------|--------|-------|--------|-------|--------|
| Br(1) | 54(1) | 48(1)  | 39(1) | 2(1)   | 16(1) | 4(1)   |
| N(1)  | 38(1) | 33(1)  | 34(2) | 0(1)   | 7(1)  | 1(1)   |
| N(2)  | 44(2) | 39(2)  | 50(2) | -4(1)  | 18(1) | -3(1)  |
| O(1)  | 70(2) | 66(2)  | 48(2) | 22(1)  | 19(1) | 30(1)  |
| C(1)  | 37(2) | 33(2)  | 34(2) | 4(1)   | 9(1)  | 5(1)   |
| C(2)  | 44(2) | 38(2)  | 46(2) | 6(2)   | 14(2) | -6(2)  |
| C(3)  | 43(2) | 27(2)  | 49(2) | -4(2)  | 6(2)  | -2(1)  |
| C(4)  | 38(2) | 26(2)  | 36(2) | 0(1)   | 3(1)  | 5(1)   |
| C(5)  | 31(2) | 29(2)  | 35(2) | 6(1)   | 3(1)  | 2(1)   |
| C(6)  | 32(2) | 28(2)  | 38(2) | 0(1)   | 4(1)  | 1(1)   |
| C(7)  | 40(2) | 45(2)  | 45(2) | -9(2)  | 11(2) | -5(2)  |
| C(8)  | 51(2) | 44(2)  | 65(3) | -7(2)  | 10(2) | -15(2) |
| C(9)  | 43(2) | 49(2)  | 69(3) | 9(2)   | 15(2) | -7(2)  |
| C(10) | 55(2) | 52(2)  | 57(2) | 3(2)   | 23(2) | 0(2)   |
| C(11) | 41(2) | 34(2)  | 38(2) | -9(1)  | 4(2)  | 0(1)   |
| C(12) | 43(2) | 23(2)  | 41(2) | 0(1)   | 10(2) | 3(1)   |
| C(13) | 40(2) | 26(2)  | 38(2) | -2(1)  | 4(1)  | -1(1)  |
| C(14) | 44(2) | 40(2)  | 45(2) | 4(2)   | 6(2)  | 3(2)   |
| C(15) | 41(2) | 46(2)  | 62(3) | -10(2) | 10(2) | 5(2)   |
| C(16) | 42(2) | 52(2)  | 48(2) | -17(2) | 9(2)  | -5(2)  |
| C(17) | 59(2) | 62(3)  | 39(2) | 3(2)   | 9(2)  | 5(2)   |
| C(18) | 49(2) | 54(2)  | 41(2) | 3(2)   | 6(2)  | 13(2)  |
| C(19) | 60(2) | 102(4) | 61(3) | -14(2) | 22(2) | 2(2)   |

**Table 5. Hydrogen coordinates (  $\times 10^4$ ) and isotropic displacement parameters ( $\text{\AA}^2 \times 10^3$ ) for N191217A.**

|        | x    | y     | z    | U(eq) |
|--------|------|-------|------|-------|
| H(2)   | 6892 | 7779  | 3213 | 51    |
| H(3)   | 6118 | 8634  | 4407 | 48    |
| H(7)   | 3258 | 3460  | 3447 | 52    |
| H(8)   | 1642 | 2086  | 3907 | 63    |
| H(9)   | 628  | 2948  | 5011 | 64    |
| H(10)  | 1289 | 5061  | 5643 | 64    |
| H(11A) | 4920 | 8451  | 5489 | 45    |
| H(11B) | 4283 | 6965  | 5656 | 45    |
| H(14)  | 1099 | 10076 | 5299 | 51    |
| H(15)  | -103 | 10388 | 6379 | 59    |
| H(17)  | 2104 | 7700  | 7772 | 64    |
| H(18)  | 3320 | 7380  | 6701 | 57    |
| H(19A) | -316 | 10172 | 7875 | 110   |
| H(19B) | 533  | 9073  | 8415 | 110   |
| H(19C) | -619 | 8509  | 7830 | 110   |

**Table 6. Torsion angles [deg] for N191217A.**

---

|                         |           |
|-------------------------|-----------|
| C(5)-N(1)-C(1)-C(2)     | 0.6(4)    |
| C(5)-N(1)-C(1)-Br(1)    | 179.5(2)  |
| N(1)-C(1)-C(2)-C(3)     | 0.6(5)    |
| Br(1)-C(1)-C(2)-C(3)    | -178.2(2) |
| C(1)-C(2)-C(3)-C(4)     | -0.9(5)   |
| C(2)-C(3)-C(4)-C(5)     | 0.2(4)    |
| C(2)-C(3)-C(4)-C(11)    | 179.1(3)  |
| C(1)-N(1)-C(5)-C(4)     | -1.5(4)   |
| C(1)-N(1)-C(5)-C(6)     | 180.0(2)  |
| C(3)-C(4)-C(5)-N(1)     | 1.1(4)    |
| C(11)-C(4)-C(5)-N(1)    | -177.8(3) |
| C(3)-C(4)-C(5)-C(6)     | 179.4(3)  |
| C(11)-C(4)-C(5)-C(6)    | 0.5(4)    |
| C(10)-N(2)-C(6)-C(7)    | 1.2(5)    |
| C(10)-N(2)-C(6)-C(5)    | -178.8(3) |
| N(1)-C(5)-C(6)-N(2)     | -175.5(3) |
| C(4)-C(5)-C(6)-N(2)     | 6.0(4)    |
| N(1)-C(5)-C(6)-C(7)     | 4.6(4)    |
| C(4)-C(5)-C(6)-C(7)     | -173.9(3) |
| N(2)-C(6)-C(7)-C(8)     | -1.5(5)   |
| C(5)-C(6)-C(7)-C(8)     | 178.4(3)  |
| C(6)-C(7)-C(8)-C(9)     | 1.4(5)    |
| C(7)-C(8)-C(9)-C(10)    | -1.1(5)   |
| C(6)-N(2)-C(10)-C(9)    | -0.8(5)   |
| C(8)-C(9)-C(10)-N(2)    | 0.8(6)    |
| C(5)-C(4)-C(11)-C(12)   | -70.9(4)  |
| C(3)-C(4)-C(11)-C(12)   | 110.3(3)  |
| C(4)-C(11)-C(12)-O(1)   | -24.4(4)  |
| C(4)-C(11)-C(12)-C(13)  | 160.1(3)  |
| O(1)-C(12)-C(13)-C(18)  | 170.7(3)  |
| C(11)-C(12)-C(13)-C(18) | -13.8(4)  |
| O(1)-C(12)-C(13)-C(14)  | -9.1(4)   |
| C(11)-C(12)-C(13)-C(14) | 166.4(3)  |
| C(18)-C(13)-C(14)-C(15) | -2.0(5)   |
| C(12)-C(13)-C(14)-C(15) | 177.8(3)  |
| C(13)-C(14)-C(15)-C(16) | 0.2(5)    |
| C(14)-C(15)-C(16)-C(17) | 1.6(5)    |
| C(14)-C(15)-C(16)-C(19) | -177.8(3) |
| C(15)-C(16)-C(17)-C(18) | -1.5(5)   |
| C(19)-C(16)-C(17)-C(18) | 177.9(3)  |
| C(16)-C(17)-C(18)-C(13) | -0.4(6)   |
| C(14)-C(13)-C(18)-C(17) | 2.1(5)    |

C(12)-C(13)-C(18)-C(17)

-177.7(3)

---

**Symmetry transformations used to generate equivalent atoms:**

**Table 7. Hydrogen bonds for N191217A [A and deg.].**

---

| D-H...A | d(D-H) | d(H...A) | d(D...A) | <(DHA) |
|---------|--------|----------|----------|--------|
|---------|--------|----------|----------|--------|

---

X-Ray crystallographic data of **3ea**:

**Table 8 Crystal data and structure refinement for A200710A.**

|                                             |                                                               |
|---------------------------------------------|---------------------------------------------------------------|
| Identification code                         | A200710A                                                      |
| Empirical formula                           | C <sub>19</sub> H <sub>16</sub> N <sub>2</sub> O <sub>2</sub> |
| Formula weight                              | 304.34                                                        |
| Temperature/K                               | 293(2)                                                        |
| Crystal system                              | monoclinic                                                    |
| Space group                                 | P2 <sub>1</sub> /c                                            |
| a/Å                                         | 8.8361(10)                                                    |
| b/Å                                         | 8.2497(8)                                                     |
| c/Å                                         | 21.719(2)                                                     |
| α/°                                         | 90                                                            |
| β/°                                         | 96.488(11)                                                    |
| γ/°                                         | 90                                                            |
| Volume/Å <sup>3</sup>                       | 1573.1(3)                                                     |
| Z                                           | 4                                                             |
| ρ <sub>calc</sub> /cm <sup>3</sup>          | 1.285                                                         |
| μ/mm <sup>-1</sup>                          | 0.085                                                         |
| F(000)                                      | 640.0                                                         |
| Crystal size/mm <sup>3</sup>                | 0.2 × 0.15 × 0.14                                             |
| Radiation                                   | MoKα (λ = 0.71073)                                            |
| 2θ range for data collection/°              | 4.64 to 50.018                                                |
| Index ranges                                | -8 ≤ h ≤ 10, -9 ≤ k ≤ 9, -25 ≤ l ≤ 25                         |
| Reflections collected                       | 7217                                                          |
| Independent reflections                     | 2776 [R <sub>int</sub> = 0.0245, R <sub>sigma</sub> = 0.0281] |
| Data/restraints/parameters                  | 2776/0/209                                                    |
| Goodness-of-fit on F <sup>2</sup>           | 1.042                                                         |
| Final R indexes [I ≥ 2σ (I)]                | R <sub>1</sub> = 0.0485, wR <sub>2</sub> = 0.1378             |
| Final R indexes [all data]                  | R <sub>1</sub> = 0.0714, wR <sub>2</sub> = 0.1575             |
| Largest diff. peak/hole / e Å <sup>-3</sup> | 0.14/-0.17                                                    |



**Table 9 Fractional Atomic Coordinates ( $\times 10^4$ ) and Equivalent Isotropic Displacement Parameters ( $\text{\AA}^2 \times 10^3$ ) for A200710A.  $U_{\text{eq}}$  is defined as 1/3 of of the trace of the orthogonalised  $U_{\text{IJ}}$  tensor.**

| Atom | x          | y          | z          | $U(\text{eq})$ |
|------|------------|------------|------------|----------------|
| O1   | 9776.0(18) | 3251.5(18) | 3854.5(8)  | 77.0(5)        |
| O2   | 5445.4(18) | 8329.5(16) | 4676.5(7)  | 69.7(4)        |
| N1   | 6305(2)    | 2447(2)    | 3309.3(10) | 84.7(6)        |
| N2   | 5485.4(18) | 5884.0(18) | 4167.0(7)  | 53.3(4)        |
| C1   | 9489(2)    | 415(2)     | 3770.9(9)  | 55.5(5)        |
| C2   | 10431(3)   | 321(3)     | 3309.7(12) | 79.9(7)        |
| C3   | 10829(3)   | -1159(3)   | 3077.1(14) | 96.0(9)        |
| C4   | 10290(3)   | -2566(3)   | 3311.0(12) | 77.5(7)        |
| C5   | 9346(3)    | -2487(3)   | 3761.3(12) | 72.2(6)        |
| C6   | 8939(3)    | -1015(2)   | 3988.4(10) | 65.2(6)        |
| C7   | 9115(2)    | 2056(2)    | 4013.1(9)  | 57.3(5)        |
| C8   | 7995(2)    | 2170(2)    | 4484.4(10) | 64.5(6)        |
| C9   | 7299(2)    | 3823(2)    | 4534.2(9)  | 55.3(5)        |
| C10  | 6112(2)    | 4394(2)    | 4116.3(8)  | 50.4(5)        |
| C11  | 6031(2)    | 6823(2)    | 4627.7(9)  | 55.7(5)        |
| C12  | 7203(2)    | 6370(3)    | 5070.9(9)  | 61.2(6)        |
| C13  | 7833(2)    | 4868(3)    | 5018.3(9)  | 61.5(6)        |
| C14  | 5413(2)    | 3467(2)    | 3572.8(9)  | 54.6(5)        |
| C15  | 5719(4)    | 1700(4)    | 2791.6(16) | 112.5(11)      |
| C16  | 4247(4)    | 1892(4)    | 2532.2(14) | 102.3(10)      |
| C17  | 3322(3)    | 2911(3)    | 2809.1(11) | 77.8(7)        |
| C18  | 3909(3)    | 3716(2)    | 3342.3(10) | 61.5(6)        |
| C19  | 4282(3)    | 8815(3)    | 4201.2(12) | 80.1(7)        |

**Table 10 Anisotropic Displacement Parameters ( $\text{\AA}^2 \times 10^3$ ) for A200710A. The Anisotropic displacement factor exponent takes the form:  $-2\pi^2[h^2a^{*2}U_{11}+2hka^*b^*U_{12}+\dots]$ .**

| Atom | $U_{11}$ | $U_{22}$ | $U_{33}$ | $U_{23}$  | $U_{13}$ | $U_{12}$  |
|------|----------|----------|----------|-----------|----------|-----------|
| O1   | 75.7(10) | 62.3(9)  | 96.2(12) | 1.1(8)    | 23.4(9)  | -17.5(8)  |
| O2   | 83(1)    | 58.1(8)  | 67.6(10) | -15.9(7)  | 6.6(8)   | 1.5(7)    |
| N1   | 86.7(13) | 76.0(13) | 90.5(15) | -37.6(11) | 6.1(12)  | 0.3(11)   |
| N2   | 58.6(10) | 51.5(9)  | 50.1(9)  | -4.1(7)   | 8.1(8)   | -5.5(8)   |
| C1   | 47.1(11) | 60.3(12) | 58.0(12) | 7.6(9)    | 1.6(9)   | -1.1(9)   |
| C2   | 79.0(15) | 70.9(15) | 94.9(18) | 10.5(13)  | 31.5(14) | -0.5(12)  |
| C3   | 97(2)    | 96(2)    | 103(2)   | 0.9(16)   | 42.0(17) | 15.4(16)  |
| C4   | 75.4(15) | 70.2(15) | 84.9(17) | -3.7(13)  | 0.0(14)  | 18.4(13)  |
| C5   | 77.7(15) | 57.2(13) | 80.0(16) | 9.1(11)   | 2.0(13)  | 4.2(11)   |
| C6   | 69.9(13) | 58.2(12) | 68.9(14) | 7.3(10)   | 13.3(11) | -1.3(10)  |
| C7   | 53.8(11) | 57.2(11) | 59.8(13) | 9.5(10)   | 1.8(10)  | -2.9(10)  |
| C8   | 70.2(13) | 60.8(12) | 63.8(14) | 7.6(10)   | 13.4(11) | 0(1)      |
| C9   | 59.8(12) | 55.1(11) | 52.4(12) | 3.6(9)    | 11.9(10) | -5.2(9)   |
| C10  | 55.4(11) | 50.4(11) | 46.8(11) | -0.8(8)   | 12.0(9)  | -8.9(9)   |
| C11  | 63.0(12) | 55.1(11) | 50.3(12) | -6.6(9)   | 12.6(10) | -8.4(10)  |
| C12  | 69.1(13) | 67.1(13) | 47.7(12) | -8.9(10)  | 7.9(10)  | -12.2(11) |
| C13  | 63.6(13) | 74.5(14) | 46.2(11) | 3.3(10)   | 5.3(10)  | -6.1(11)  |
| C14  | 66.0(13) | 47.5(10) | 51.4(12) | -2.3(9)   | 11.5(10) | -9.6(9)   |
| C15  | 121(2)   | 103(2)   | 111(2)   | -61.1(19) | 1(2)     | 0.1(18)   |
| C16  | 133(3)   | 87.8(18) | 82.4(19) | -37.3(15) | -4.3(19) | -28.6(18) |
| C17  | 87.3(16) | 77.1(15) | 65.2(15) | 4.5(12)   | -8.3(13) | -29.0(13) |
| C18  | 68.9(14) | 61.9(12) | 53.2(12) | 2.7(10)   | 4.7(11)  | -11.2(10) |
| C19  | 93.8(18) | 66.7(14) | 77.7(17) | -10.5(12) | 0.7(14)  | 12.7(12)  |

**Table 11 Bond Lengths for A200710A.**

| Atom | Atom | Length/Å | Atom | Atom | Length/Å |
|------|------|----------|------|------|----------|
| O1   | C7   | 1.216(2) | C5   | C6   | 1.374(3) |
| O2   | C11  | 1.355(2) | C7   | C8   | 1.505(3) |
| O2   | C19  | 1.429(3) | C8   | C9   | 1.505(3) |
| N1   | C14  | 1.326(3) | C9   | C10  | 1.390(3) |
| N1   | C15  | 1.335(3) | C9   | C13  | 1.400(3) |
| N2   | C10  | 1.357(2) | C10  | C14  | 1.481(3) |
| N2   | C11  | 1.313(2) | C11  | C12  | 1.384(3) |
| C1   | C2   | 1.375(3) | C12  | C13  | 1.368(3) |
| C1   | C6   | 1.379(3) | C14  | C18  | 1.382(3) |
| C1   | C7   | 1.502(3) | C15  | C16  | 1.367(4) |
| C2   | C3   | 1.382(4) | C16  | C17  | 1.359(4) |
| C3   | C4   | 1.374(4) | C17  | C18  | 1.384(3) |
| C4   | C5   | 1.357(3) |      |      |          |

**Table 12 Bond Angles for A200710A.**

| Atom | Atom | Atom | Angle/°    | Atom | Atom | Atom | Angle/°    |
|------|------|------|------------|------|------|------|------------|
| C11  | O2   | C19  | 116.76(16) | C13  | C9   | C8   | 120.45(19) |
| C14  | N1   | C15  | 117.6(2)   | N2   | C10  | C9   | 122.60(17) |
| C11  | N2   | C10  | 118.57(18) | N2   | C10  | C14  | 113.28(17) |
| C2   | C1   | C6   | 117.8(2)   | C9   | C10  | C14  | 124.12(17) |
| C2   | C1   | C7   | 118.74(18) | O2   | C11  | C12  | 117.12(17) |
| C6   | C1   | C7   | 123.41(18) | N2   | C11  | O2   | 119.36(19) |
| C1   | C2   | C3   | 121.1(2)   | N2   | C11  | C12  | 123.51(18) |
| C4   | C3   | C2   | 119.9(2)   | C13  | C12  | C11  | 117.78(18) |
| C5   | C4   | C3   | 119.5(2)   | C12  | C13  | C9   | 121.0(2)   |
| C4   | C5   | C6   | 120.5(2)   | N1   | C14  | C10  | 117.20(18) |
| C5   | C6   | C1   | 121.1(2)   | N1   | C14  | C18  | 122.16(19) |
| O1   | C7   | C1   | 120.03(18) | C18  | C14  | C10  | 120.59(18) |
| O1   | C7   | C8   | 121.04(19) | N1   | C15  | C16  | 123.6(3)   |
| C1   | C7   | C8   | 118.80(17) | C17  | C16  | C15  | 118.8(2)   |
| C9   | C8   | C7   | 114.26(16) | C16  | C17  | C18  | 118.7(2)   |
| C10  | C9   | C8   | 123.01(18) | C14  | C18  | C17  | 119.1(2)   |
| C10  | C9   | C13  | 116.53(18) |      |      |      |            |

**Table 13 Torsion Angles for A200710A.**

| A  | B   | C   | D   | Angle/°     | A   | B   | C   | D   | Angle/°     |
|----|-----|-----|-----|-------------|-----|-----|-----|-----|-------------|
| O1 | C7  | C8  | C9  | 24.0(3)     | C8  | C9  | C10 | N2  | 179.61(17)  |
| O2 | C11 | C12 | C13 | -178.34(17) | C8  | C9  | C10 | C14 | -1.0(3)     |
| N1 | C14 | C18 | C17 | -1.8(3)     | C8  | C9  | C13 | C12 | -179.60(18) |
| N1 | C15 | C16 | C17 | 0.7(5)      | C9  | C10 | C14 | N1  | -31.0(3)    |
| N2 | C10 | C14 | N1  | 148.47(19)  | C9  | C10 | C14 | C18 | 151.44(19)  |
| N2 | C10 | C14 | C18 | -29.1(2)    | C10 | N2  | C11 | O2  | 178.34(16)  |
| N2 | C11 | C12 | C13 | 0.8(3)      | C10 | N2  | C11 | C12 | -0.7(3)     |
| C1 | C2  | C3  | C4  | -0.5(4)     | C10 | C9  | C13 | C12 | 0.1(3)      |
| C1 | C7  | C8  | C9  | -160.15(18) | C10 | C14 | C18 | C17 | 175.65(17)  |
| C2 | C1  | C6  | C5  | 1.4(3)      | C11 | N2  | C10 | C9  | 0.4(3)      |
| C2 | C1  | C7  | O1  | -8.5(3)     | C11 | N2  | C10 | C14 | -179.07(16) |
| C2 | C1  | C7  | C8  | 175.6(2)    | C11 | C12 | C13 | C9  | -0.4(3)     |
| C2 | C3  | C4  | C5  | 1.2(4)      | C13 | C9  | C10 | N2  | 0.0(3)      |
| C3 | C4  | C5  | C6  | -0.6(4)     | C13 | C9  | C10 | C14 | 179.34(17)  |
| C4 | C5  | C6  | C1  | -0.7(4)     | C14 | N1  | C15 | C16 | -2.0(5)     |
| C6 | C1  | C2  | C3  | -0.8(4)     | C15 | N1  | C14 | C10 | -175.0(2)   |
| C6 | C1  | C7  | O1  | 171.3(2)    | C15 | N1  | C14 | C18 | 2.6(3)      |
| C6 | C1  | C7  | C8  | -4.6(3)     | C15 | C16 | C17 | C18 | 0.2(4)      |
| C7 | C1  | C2  | C3  | 179.0(2)    | C16 | C17 | C18 | C14 | 0.4(3)      |
| C7 | C1  | C6  | C5  | -178.39(19) | C19 | O2  | C11 | N2  | -1.9(3)     |
| C7 | C8  | C9  | C10 | 79.4(2)     | C19 | O2  | C11 | C12 | 177.26(19)  |
| C7 | C8  | C9  | C13 | -101.0(2)   |     |     |     |     |             |

**Table 14 Hydrogen Atom Coordinates ( $\text{\AA} \times 10^4$ ) and Isotropic Displacement Parameters ( $\text{\AA}^2 \times 10^3$ ) for A200710A.**

| Atom | x     | y     | z    | U(eq) |
|------|-------|-------|------|-------|
| H2   | 10806 | 1269  | 3152 | 96    |
| H3   | 11461 | -1202 | 2763 | 115   |
| H4   | 10571 | -3566 | 3162 | 93    |
| H5   | 8971  | -3438 | 3918 | 87    |
| H6   | 8282  | -982  | 4294 | 78    |
| H8A  | 7185  | 1391  | 4378 | 77    |
| H8B  | 8508  | 1868  | 4887 | 77    |
| H12  | 7552  | 7064  | 5394 | 73    |
| H13  | 8627  | 4537  | 5309 | 74    |
| H15  | 6347  | 1009  | 2597 | 135   |
| H16  | 3886  | 1336  | 2173 | 123   |
| H17  | 2315  | 3063  | 2644 | 93    |

|      |      |      |      |     |
|------|------|------|------|-----|
| H18  | 3299 | 4415 | 3543 | 74  |
| H19A | 4674 | 8780 | 3807 | 120 |
| H19B | 3961 | 9899 | 4281 | 120 |
| H19C | 3429 | 8091 | 4196 | 120 |

X-Ray crystallographic data of **4aa**:

**Table 15 Crystal data and structure refinement for A200108A.**

|                                             |                                                               |
|---------------------------------------------|---------------------------------------------------------------|
| Identification code                         | A200108A                                                      |
| Empirical formula                           | C <sub>18</sub> H <sub>11</sub> BrN <sub>2</sub> O            |
| Formula weight                              | 351.20                                                        |
| Temperature/K                               | 293(2)                                                        |
| Crystal system                              | monoclinic                                                    |
| Space group                                 | P2 <sub>1</sub> /c                                            |
| a/Å                                         | 11.7732(5)                                                    |
| b/Å                                         | 7.7539(3)                                                     |
| c/Å                                         | 15.9751(7)                                                    |
| α/°                                         | 90                                                            |
| β/°                                         | 104.728(4)                                                    |
| γ/°                                         | 90                                                            |
| Volume/Å <sup>3</sup>                       | 1410.43(10)                                                   |
| Z                                           | 4                                                             |
| ρ <sub>calc</sub> /cm <sup>3</sup>          | 1.654                                                         |
| μ/mm <sup>-1</sup>                          | 3.992                                                         |
| F(000)                                      | 704.0                                                         |
| Crystal size/mm <sup>3</sup>                | 0.18 × 0.17 × 0.16                                            |
| Radiation                                   | CuKα (λ = 1.54184)                                            |
| 2θ range for data collection/°              | 7.764 to 134.09                                               |
| Index ranges                                | -13 ≤ h ≤ 14, -6 ≤ k ≤ 9, -19 ≤ l ≤ 18                        |
| Reflections collected                       | 4725                                                          |
| Independent reflections                     | 2512 [R <sub>int</sub> = 0.0850, R <sub>sigma</sub> = 0.0876] |
| Data/restraints/parameters                  | 2512/0/199                                                    |
| Goodness-of-fit on F <sup>2</sup>           | 1.045                                                         |
| Final R indexes [I >= 2σ (I)]               | R <sub>1</sub> = 0.0845, wR <sub>2</sub> = 0.2077             |
| Final R indexes [all data]                  | R <sub>1</sub> = 0.0943, wR <sub>2</sub> = 0.2305             |
| Largest diff. peak/hole / e Å <sup>-3</sup> | 1.57/-1.71                                                    |

**Table 16 Fractional Atomic Coordinates ( $\times 10^4$ ) and Equivalent Isotropic Displacement Parameters ( $\text{\AA}^2 \times 10^3$ ) for A200108A.  $U_{\text{eq}}$  is defined as 1/3 of the trace of the orthogonalised  $U_{ij}$  tensor.**

| Atom | x         | y         | z         | U(eq)    |
|------|-----------|-----------|-----------|----------|
| Br1  | 2333.8(4) | 8755.3(7) | 4567.1(4) | 25.8(3)  |
| O1   | 9377(3)   | 6370(5)   | 5591(3)   | 25.3(9)  |
| N1   | 7156(4)   | 5626(6)   | 4390(3)   | 18.9(9)  |
| N2   | 4273(4)   | 7214(5)   | 4237(3)   | 20.5(9)  |
| C1   | 5998(5)   | 5851(7)   | 3908(3)   | 20.3(11) |
| C2   | 5643(5)   | 5199(7)   | 3064(4)   | 24.8(11) |
| C3   | 6431(5)   | 4343(7)   | 2716(3)   | 27.0(12) |
| C4   | 7593(5)   | 4112(7)   | 3221(4)   | 24.2(11) |
| C5   | 7942(4)   | 4764(7)   | 4048(4)   | 23.8(11) |
| C6   | 7308(5)   | 6284(6)   | 5233(4)   | 19.0(11) |
| C7   | 6210(4)   | 6945(7)   | 5269(4)   | 21.1(11) |
| C8   | 5411(4)   | 6698(7)   | 4462(3)   | 19.4(10) |
| C9   | 3933(4)   | 8006(6)   | 4853(3)   | 20.2(10) |
| C10  | 4645(5)   | 8400(7)   | 5687(3)   | 20.3(10) |
| C11  | 5795(4)   | 7860(6)   | 5898(3)   | 20.2(10) |
| C12  | 8467(5)   | 6383(6)   | 5826(4)   | 19.0(12) |
| C13  | 8531(5)   | 6499(7)   | 6769(4)   | 20.1(11) |
| C14  | 7830(4)   | 5458(6)   | 7148(3)   | 20.9(11) |
| C15  | 8005(4)   | 5463(7)   | 8044(4)   | 23.1(11) |
| C16  | 8850(5)   | 6487(8)   | 8567(4)   | 24.8(12) |
| C17  | 9537(5)   | 7558(7)   | 8190(4)   | 26.4(11) |
| C18  | 9389(4)   | 7539(7)   | 7296(4)   | 24.1(11) |

**Table 17 Anisotropic Displacement Parameters ( $\text{\AA}^2 \times 10^3$ ) for A200108A. The Anisotropic displacement factor exponent takes the form:  $-2\pi^2[h^2a^{*2}U_{11}+2hka^*b^*U_{12}+\dots]$ .**

| Atom | $U_{11}$ | $U_{22}$ | $U_{33}$ | $U_{23}$ | $U_{13}$ | $U_{12}$ |
|------|----------|----------|----------|----------|----------|----------|
| Br1  | 10.1(5)  | 28.4(5)  | 35.0(5)  | 3.5(2)   | -1.3(3)  | 1.54(17) |
| O1   | 12.0(19) | 35(2)    | 27(2)    | 0.2(16)  | 0.5(16)  | 1.6(14)  |
| N1   | 13.1(19) | 19(2)    | 21.7(19) | 1.9(18)  | -1.2(16) | -2.2(17) |
| N2   | 13.3(19) | 18(2)    | 26(2)    | 1.3(17)  | -3.3(17) | -2.8(16) |
| C1   | 16(3)    | 19(2)    | 22(3)    | 6(2)     | -2(2)    | -4(2)    |
| C2   | 20(2)    | 26(3)    | 24(2)    | 1(2)     | -2(2)    | -3(2)    |
| C3   | 35(3)    | 24(3)    | 20(2)    | -3(2)    | 4(2)     | -3(2)    |
| C4   | 28(3)    | 21(2)    | 27(3)    | 1(2)     | 13(2)    | 0(2)     |
| C5   | 16(2)    | 21(2)    | 33(3)    | -1(2)    | 4(2)     | -1(2)    |
| C6   | 16(3)    | 16(3)    | 22(3)    | -0.2(18) | 0(2)     | 0.1(18)  |
| C7   | 14(2)    | 21(2)    | 25(2)    | 4(2)     | -1(2)    | -5(2)    |
| C8   | 12(2)    | 20(2)    | 22(2)    | 2(2)     | -2(2)    | -4(2)    |
| C9   | 13(2)    | 21(2)    | 23(2)    | 8(2)     | -2.2(19) | -0.4(19) |
| C10  | 16(2)    | 21(2)    | 24(3)    | 0(2)     | 4(2)     | -2(2)    |
| C11  | 11(2)    | 20(2)    | 25(2)    | 0(2)     | -5.2(19) | -1.9(18) |
| C12  | 9(3)     | 15(2)    | 30(3)    | 3.6(18)  | 1(2)     | 0.0(16)  |
| C13  | 11(2)    | 23(2)    | 24(3)    | 3(2)     | -1(2)    | 3.5(19)  |
| C14  | 13(2)    | 21(2)    | 25(3)    | -1(2)    | -3(2)    | 0.2(19)  |
| C15  | 17(2)    | 22(3)    | 29(3)    | 3(2)     | 4(2)     | 3.0(19)  |
| C16  | 19(3)    | 29(3)    | 21(3)    | 0(2)     | -4(2)    | 7(2)     |
| C17  | 15(2)    | 25(2)    | 31(3)    | -5(2)    | -8(2)    | 1(2)     |
| C18  | 13(2)    | 24(2)    | 32(3)    | -1(2)    | -1(2)    | -2(2)    |



**Table 18 Bond Lengths for A200108A.**

| <b>Atom Atom</b> | <b>Length/Å</b> | <b>Atom Atom</b> | <b>Length/Å</b> |
|------------------|-----------------|------------------|-----------------|
| Br1 C9           | 1.912(5)        | C6 C12           | 1.452(7)        |
| O1 C12           | 1.223(7)        | C7 C8            | 1.402(8)        |
| N1 C1            | 1.396(7)        | C7 C11           | 1.414(8)        |
| N1 C5            | 1.364(7)        | C9 C10           | 1.415(8)        |
| N1 C6            | 1.408(7)        | C10 C11          | 1.374(7)        |
| N2 C8            | 1.356(7)        | C12 C13          | 1.491(8)        |
| N2 C9            | 1.306(7)        | C13 C14          | 1.398(8)        |
| C1 C2            | 1.401(8)        | C13 C18          | 1.395(8)        |
| C1 C8            | 1.415(8)        | C14 C15          | 1.393(7)        |
| C2 C3            | 1.369(9)        | C15 C16          | 1.377(8)        |
| C3 C4            | 1.413(8)        | C16 C17          | 1.398(9)        |
| C4 C5            | 1.375(8)        | C17 C18          | 1.394(8)        |
| C6 C7            | 1.405(8)        |                  |                 |

**Table 19 Bond Angles for A200108A.**

| <b>Atom Atom Atom</b> | <b>Angle/°</b> | <b>Atom Atom Atom</b> | <b>Angle/°</b> |
|-----------------------|----------------|-----------------------|----------------|
| C1 N1 C6              | 110.5(4)       | N2 C8 C7              | 126.1(5)       |
| C5 N1 C1              | 120.5(5)       | C7 C8 C1              | 108.6(5)       |
| C5 N1 C6              | 128.8(5)       | N2 C9 Br1             | 115.8(4)       |
| C9 N2 C8              | 114.2(4)       | N2 C9 C10             | 126.1(5)       |
| N1 C1 C2              | 119.7(5)       | C10 C9 Br1            | 118.1(4)       |
| N1 C1 C8              | 106.1(4)       | C11 C10 C9            | 118.4(5)       |
| C2 C1 C8              | 134.1(5)       | C10 C11 C7            | 118.4(5)       |
| C3 C2 C1              | 120.0(5)       | O1 C12 C6             | 123.4(6)       |
| C2 C3 C4              | 119.2(5)       | O1 C12 C13            | 119.2(5)       |
| C5 C4 C3              | 120.8(5)       | C6 C12 C13            | 117.4(5)       |
| N1 C5 C4              | 119.9(5)       | C14 C13 C12           | 121.3(5)       |
| N1 C6 C12             | 120.9(5)       | C18 C13 C12           | 119.2(5)       |
| C7 C6 N1              | 106.1(5)       | C18 C13 C14           | 119.2(5)       |
| C7 C6 C12             | 132.4(5)       | C15 C14 C13           | 119.6(5)       |
| C6 C7 C11             | 134.4(5)       | C16 C15 C14           | 121.3(5)       |
| C8 C7 C6              | 108.7(5)       | C15 C16 C17           | 119.3(5)       |
| C8 C7 C11             | 116.7(5)       | C18 C17 C16           | 120.0(5)       |
| N2 C8 C1              | 125.3(5)       | C17 C18 C13           | 120.5(5)       |

**Table 20 Torsion Angles for A200108A.**

| <b>A</b> | <b>B</b> | <b>C</b> | <b>D</b> | <b>Angle/°</b> | <b>A</b> | <b>B</b> | <b>C</b> | <b>D</b> | <b>Angle/°</b> |
|----------|----------|----------|----------|----------------|----------|----------|----------|----------|----------------|
| Br1      | C9       | C10      | C11      | 179.8(4)       | C6       | C7       | C8       | N2       | -177.8(5)      |
| O1       | C12      | C13      | C14      | -135.8(5)      | C6       | C7       | C8       | C1       | 0.8(6)         |
| O1       | C12      | C13      | C18      | 37.6(7)        | C6       | C7       | C11      | C10      | 176.3(6)       |
| N1       | C1       | C2       | C3       | 0.0(8)         | C6       | C12      | C13      | C14      | 43.9(7)        |
| N1       | C1       | C8       | N2       | 177.6(5)       | C6       | C12      | C13      | C18      | -142.7(5)      |
| N1       | C1       | C8       | C7       | -1.0(6)        | C7       | C6       | C12      | O1       | -149.7(6)      |
| N1       | C6       | C7       | C8       | -0.3(6)        | C7       | C6       | C12      | C13      | 30.6(8)        |
| N1       | C6       | C7       | C11      | -175.3(5)      | C8       | N2       | C9       | Br1      | -179.9(3)      |
| N1       | C6       | C12      | O1       | 20.4(7)        | C8       | N2       | C9       | C10      | 2.4(7)         |
| N1       | C6       | C12      | C13      | -159.3(4)      | C8       | C1       | C2       | C3       | -176.4(6)      |
| N2       | C9       | C10      | C11      | -2.6(8)        | C8       | C7       | C11      | C10      | 1.6(7)         |
| C1       | N1       | C5       | C4       | 0.0(8)         | C9       | N2       | C8       | C1       | -178.5(5)      |
| C1       | N1       | C6       | C7       | -0.3(5)        | C9       | N2       | C8       | C7       | -0.2(7)        |
| C1       | N1       | C6       | C12      | -172.8(4)      | C9       | C10      | C11      | C7       | 0.3(7)         |
| C1       | C2       | C3       | C4       | 0.8(8)         | C11      | C7       | C8       | N2       | -1.8(8)        |
| C2       | C1       | C8       | N2       | -5.7(10)       | C11      | C7       | C8       | C1       | 176.8(4)       |
| C2       | C1       | C8       | C7       | 175.8(6)       | C12      | C6       | C7       | C8       | 170.9(5)       |
| C2       | C3       | C4       | C5       | -1.3(9)        | C12      | C6       | C7       | C11      | -4.1(10)       |
| C3       | C4       | C5       | N1       | 0.8(8)         | C12      | C13      | C14      | C15      | 172.9(5)       |
| C5       | N1       | C1       | C2       | -0.5(7)        | C12      | C13      | C18      | C17      | -174.4(5)      |
| C5       | N1       | C1       | C8       | 176.8(5)       | C13      | C14      | C15      | C16      | 0.6(8)         |
| C5       | N1       | C6       | C7       | -175.9(5)      | C14      | C13      | C18      | C17      | -0.9(8)        |
| C5       | N1       | C6       | C12      | 11.6(8)        | C14      | C15      | C16      | C17      | 0.7(8)         |
| C6       | N1       | C1       | C2       | -176.5(5)      | C15      | C16      | C17      | C18      | -2.1(8)        |
| C6       | N1       | C1       | C8       | 0.8(6)         | C16      | C17      | C18      | C13      | 2.2(8)         |
| C6       | N1       | C5       | C4       | 175.3(5)       | C18      | C13      | C14      | C15      | -0.6(7)        |

**Table 21 Hydrogen Atom Coordinates ( $\text{\AA}\times 10^4$ ) and Isotropic Displacement Parameters ( $\text{\AA}^2\times 10^3$ ) for A200108A.**

| <b>Atom</b> | <b>x</b> | <b>y</b> | <b>z</b> | <b>U(eq)</b> |
|-------------|----------|----------|----------|--------------|
| H2          | 4872     | 5346     | 2741     | 30           |
| H3          | 6204     | 3919     | 2153     | 32           |
| H4          | 8129     | 3512     | 2992     | 29           |
| H5          | 8712     | 4617     | 4372     | 29           |
| H10         | 4343     | 9010     | 6083     | 24           |
| H11         | 6288     | 8090     | 6441     | 24           |
| H14         | 7250     | 4766     | 6805     | 25           |
| H15         | 7542     | 4759     | 8295     | 28           |
| H16         | 8963     | 6468     | 9165     | 30           |
| H17         | 10093    | 8283     | 8535     | 32           |
| H18         | 9866     | 8223     | 7049     | 29           |
